# Supplementary material for: The genomic landscape of recurrent ovarian high grade serous carcinoma: the BriTROC-1 study
Source: bioRxiv or medRxiv preprint supplement (doi:10.1101/2022.10.21.22280992), 2022-10-25

BRITROC-1

stage: 3C  
 platinum status: resistant  
 prior lines: 1

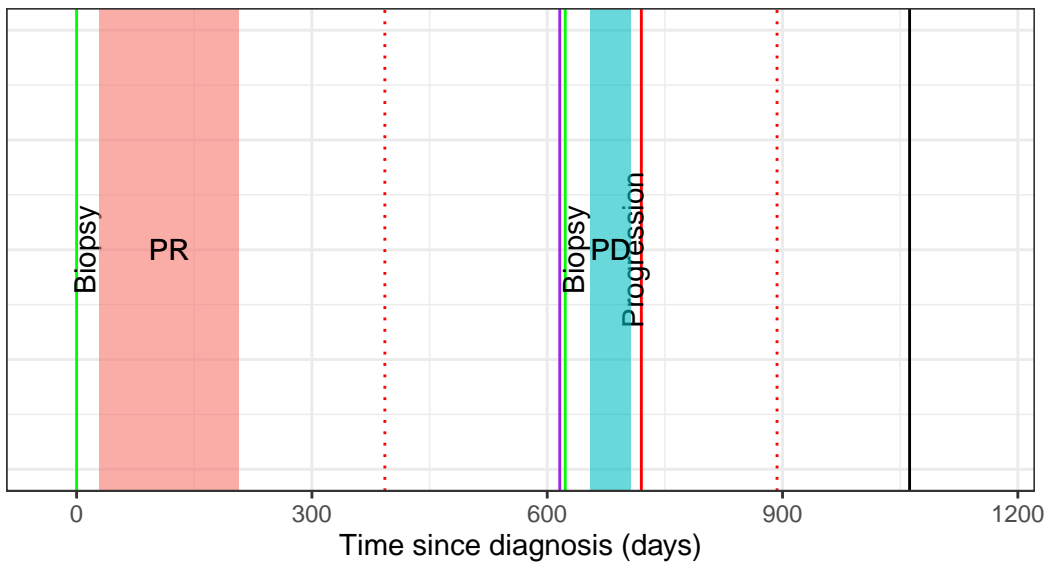

drug ■ Carboplatin ■ PLD

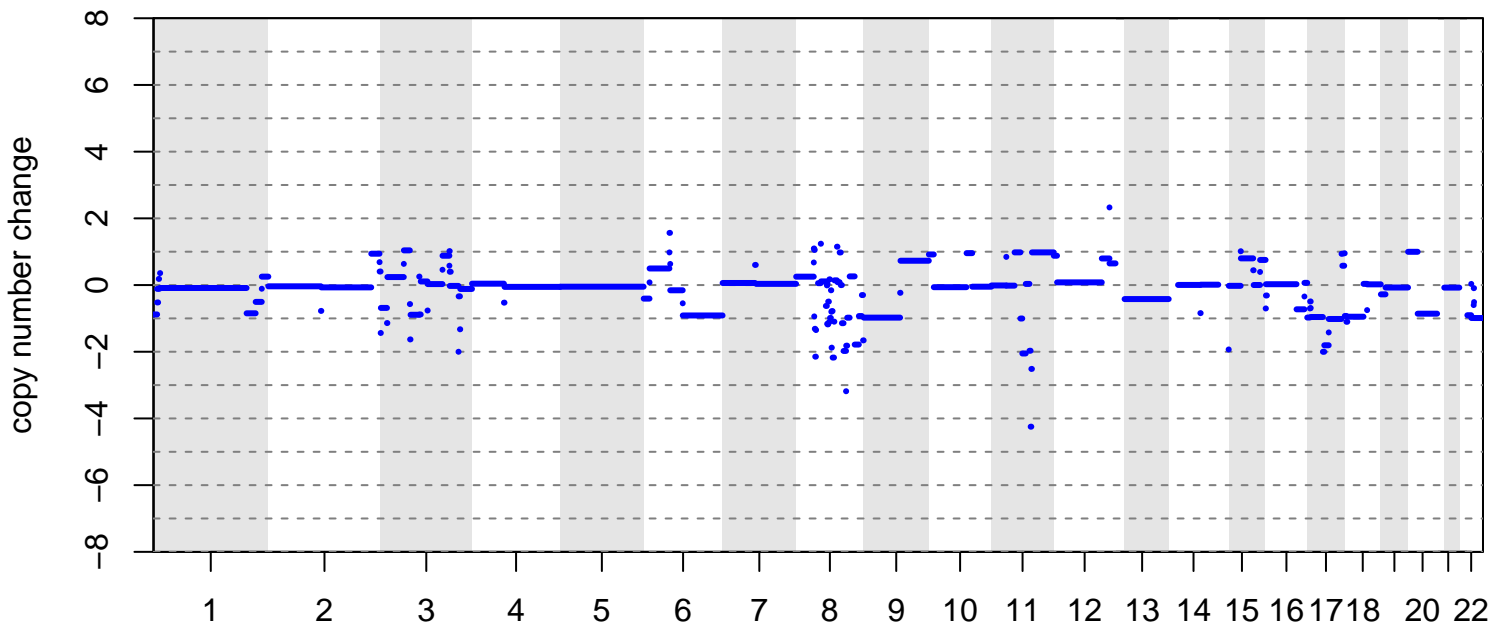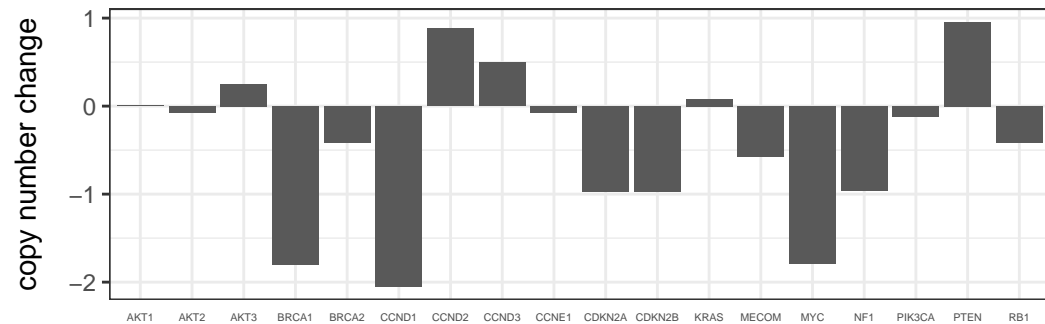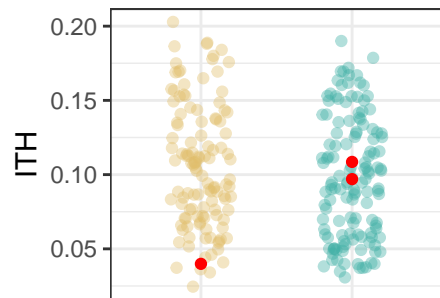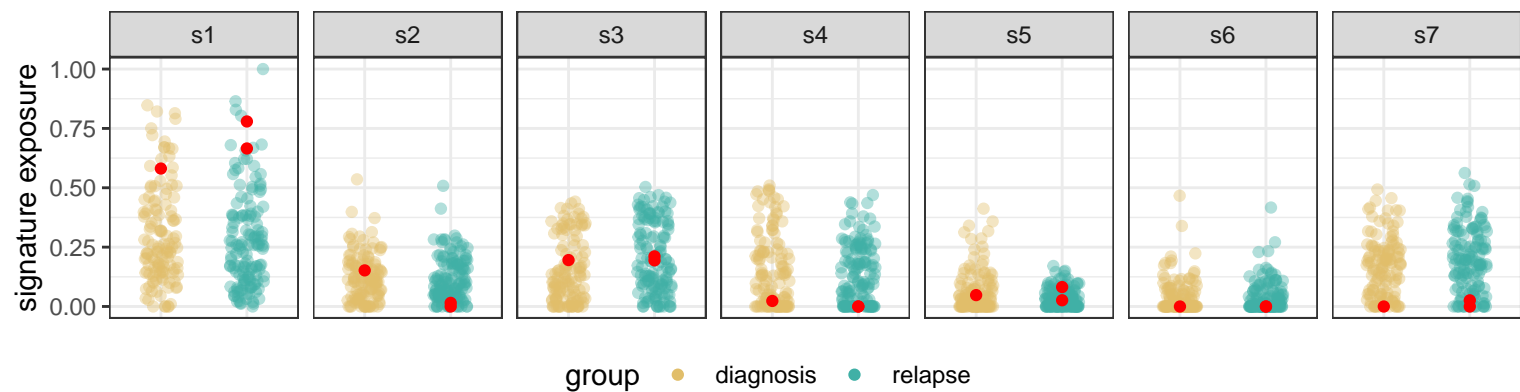

BRITROC-106

stage: 3C  
 platinum status: sensitive  
 prior lines: 2

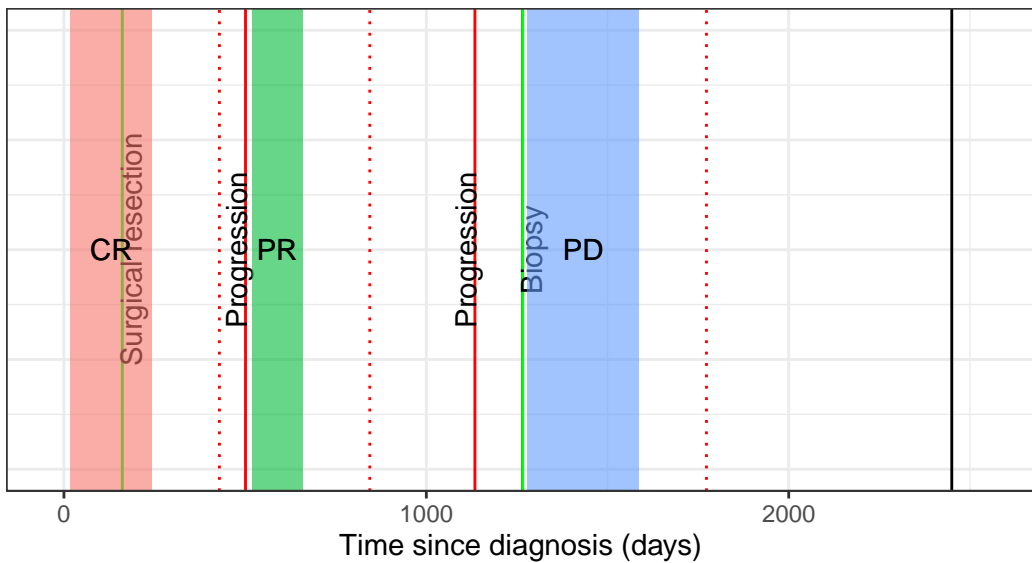

drug ■ Carboplatin + Paclitaxel ■ Carboplatin + PLD ■ Rucaparib

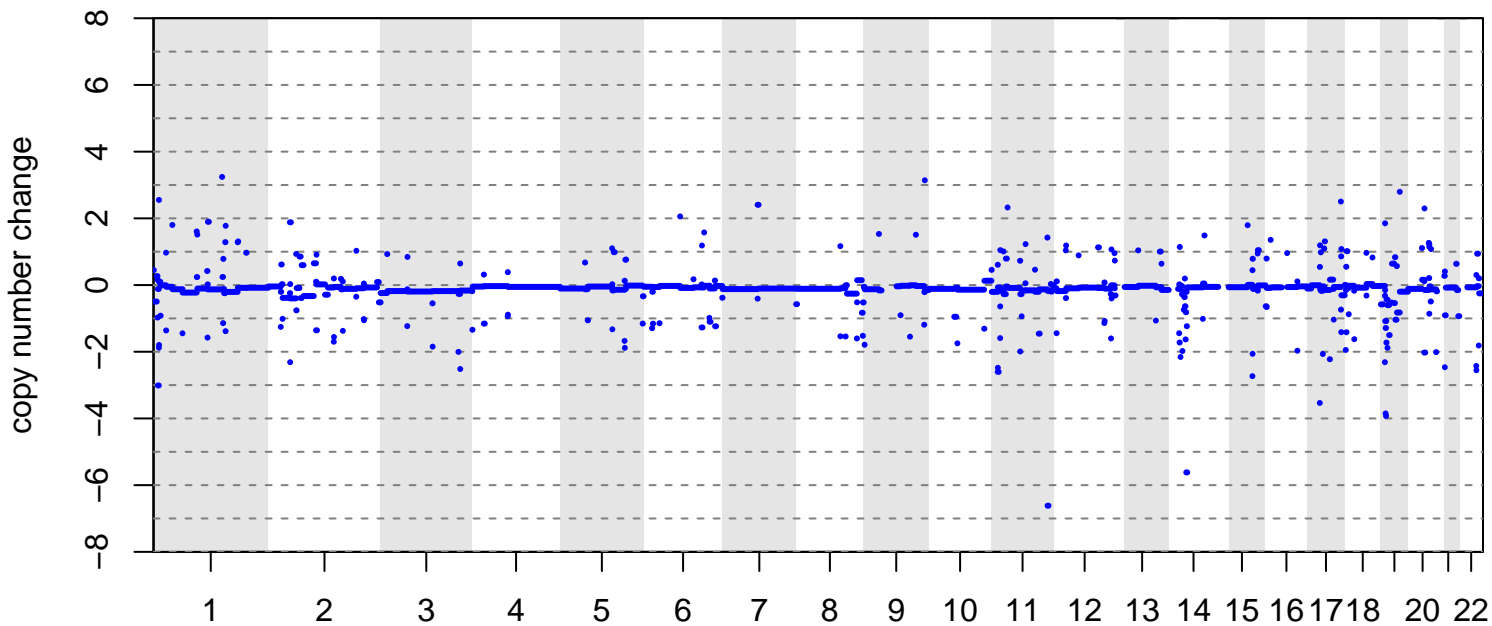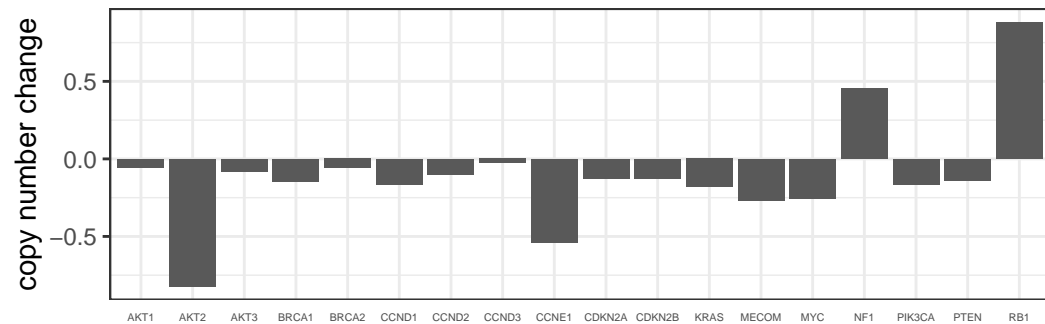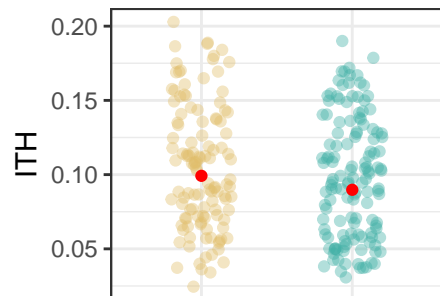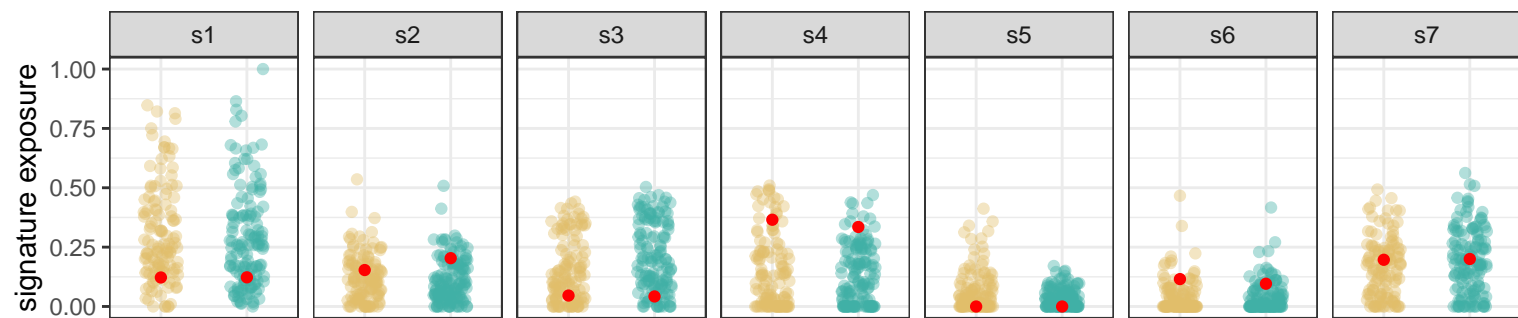

group ● diagnosis ● relapse

BRITROC-11

stage: 3C  
 platinum status: sensitive  
 prior lines: 1

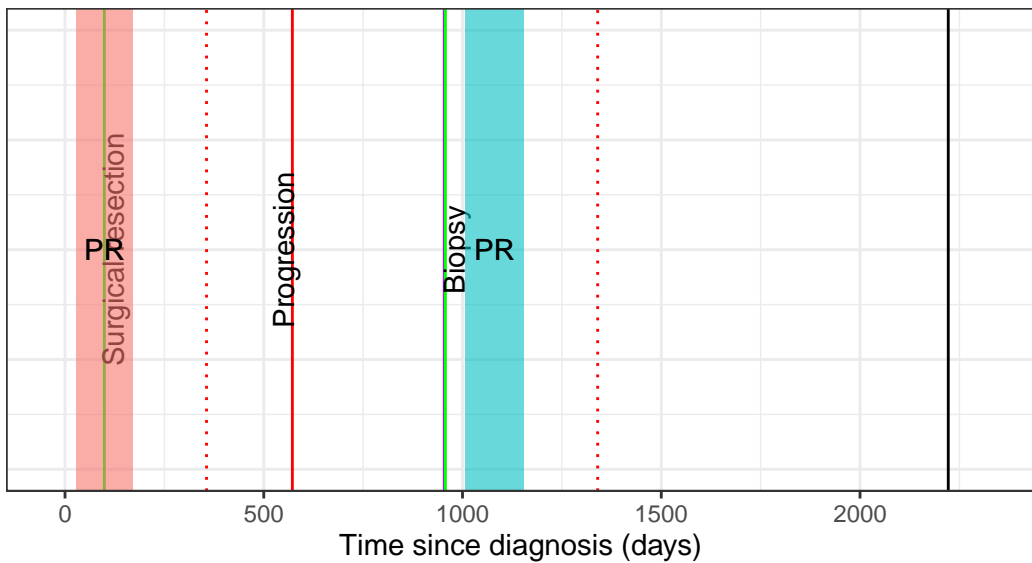

drug ■ Carboplatin + Paclitaxel ■ Carboplatin + PLD

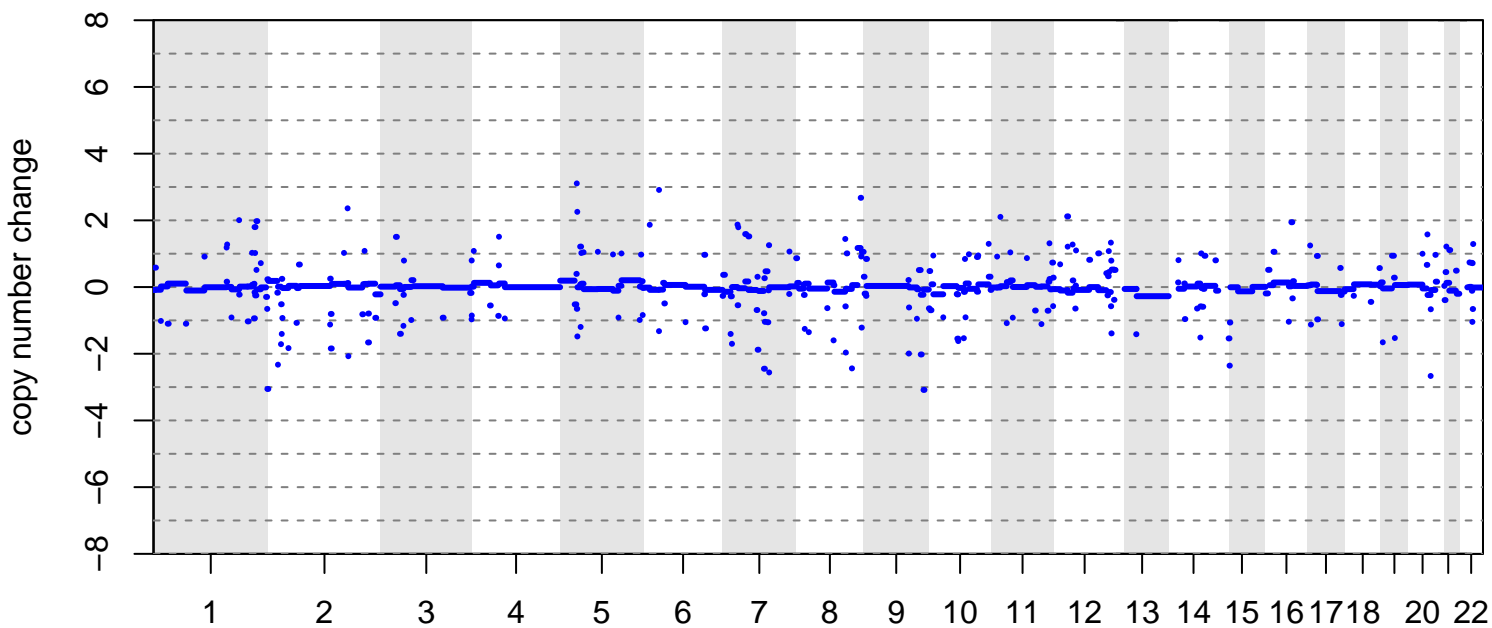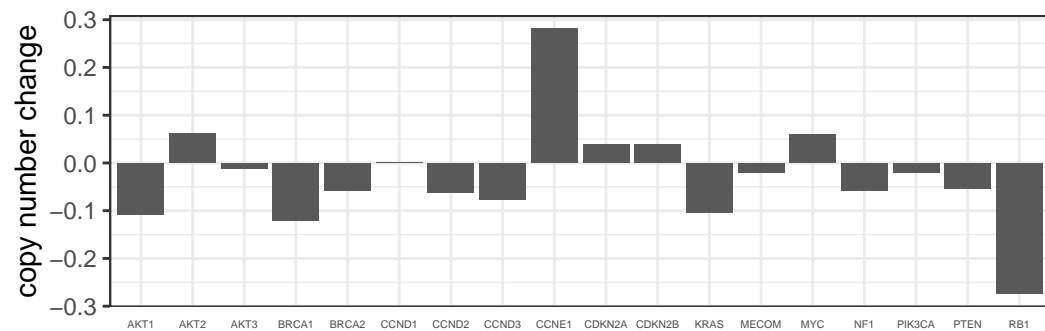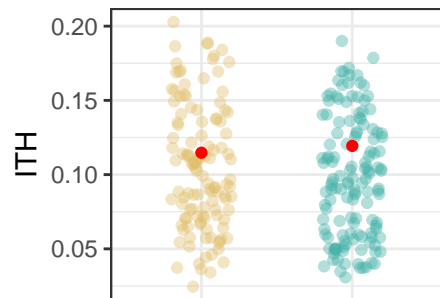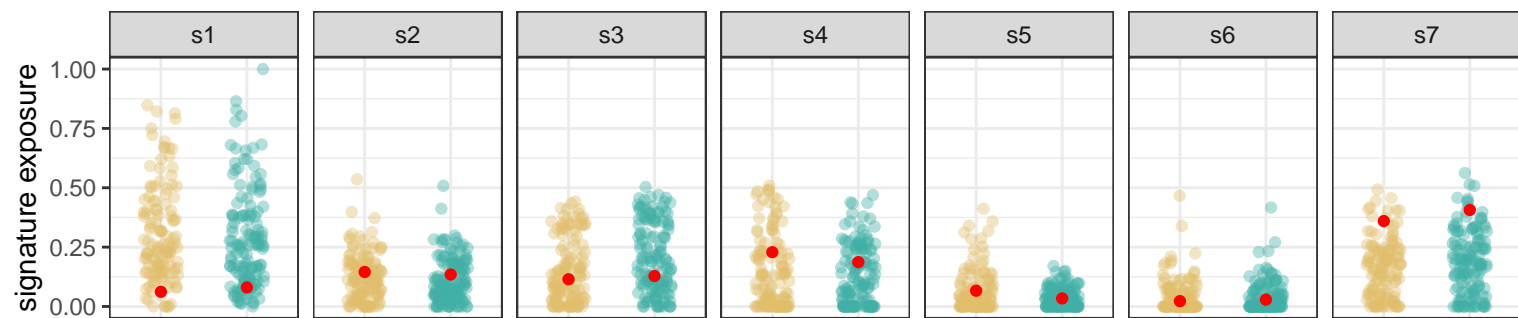

group ● diagnosis ● relapse

# BRITROC-124

stage: 3C  
platinum status: sensitive  
prior lines: 1

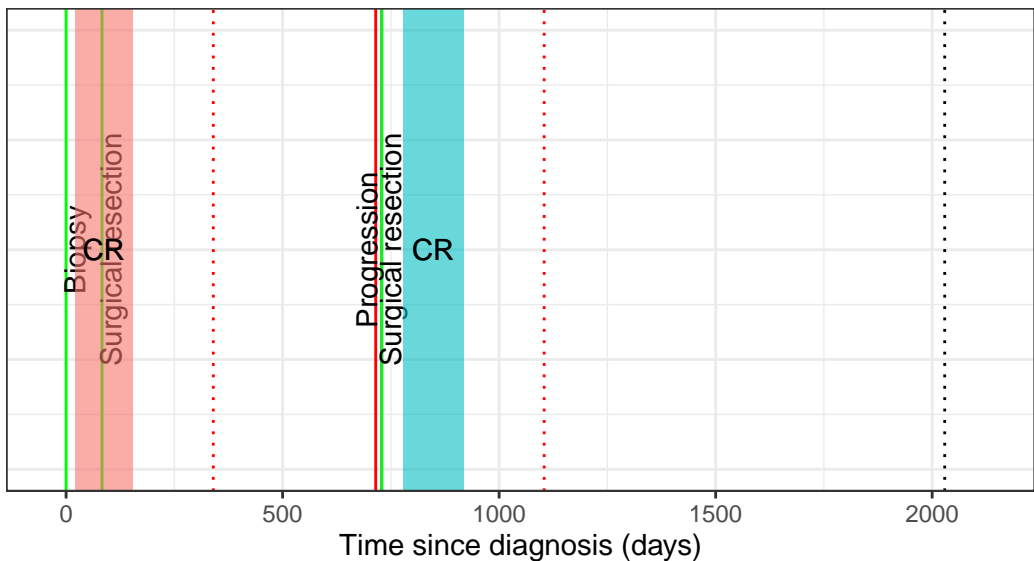

drug Carboplatin + Paclitaxel Carboplatin + PLD

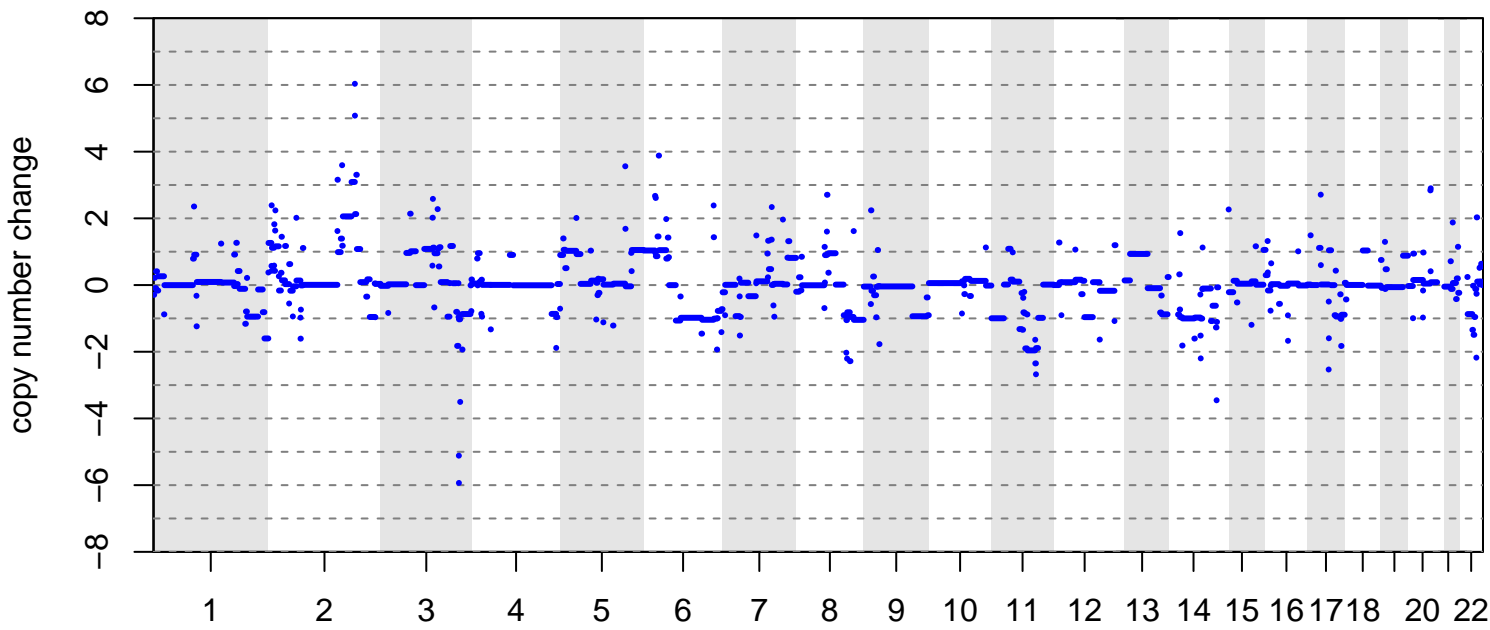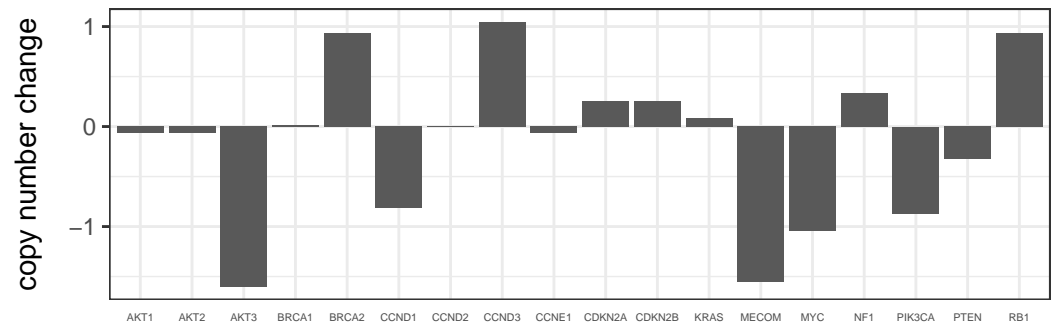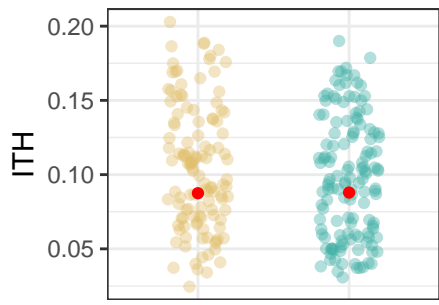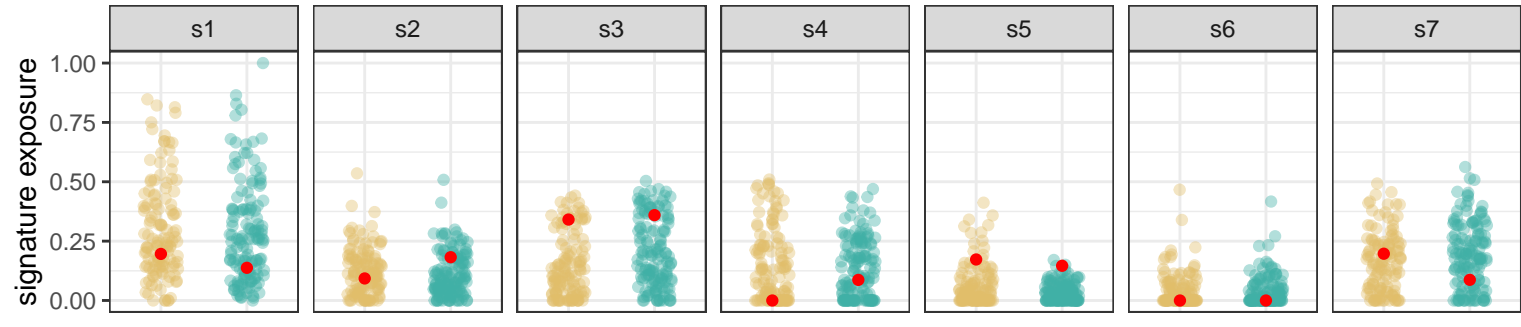

group diagnosis relapse

BRITROC-132

stage: 3B

platinum status: sensitive

prior lines: 1

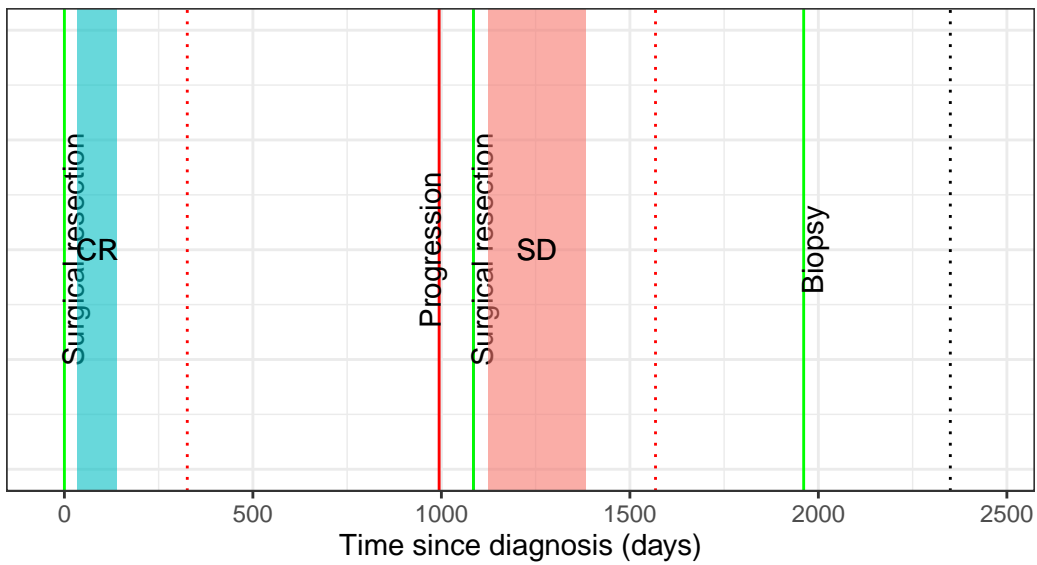

drug ■ Carboplatin + Paclitaxel ■ Bevacizumab + Carboplatin + Gemcitabine

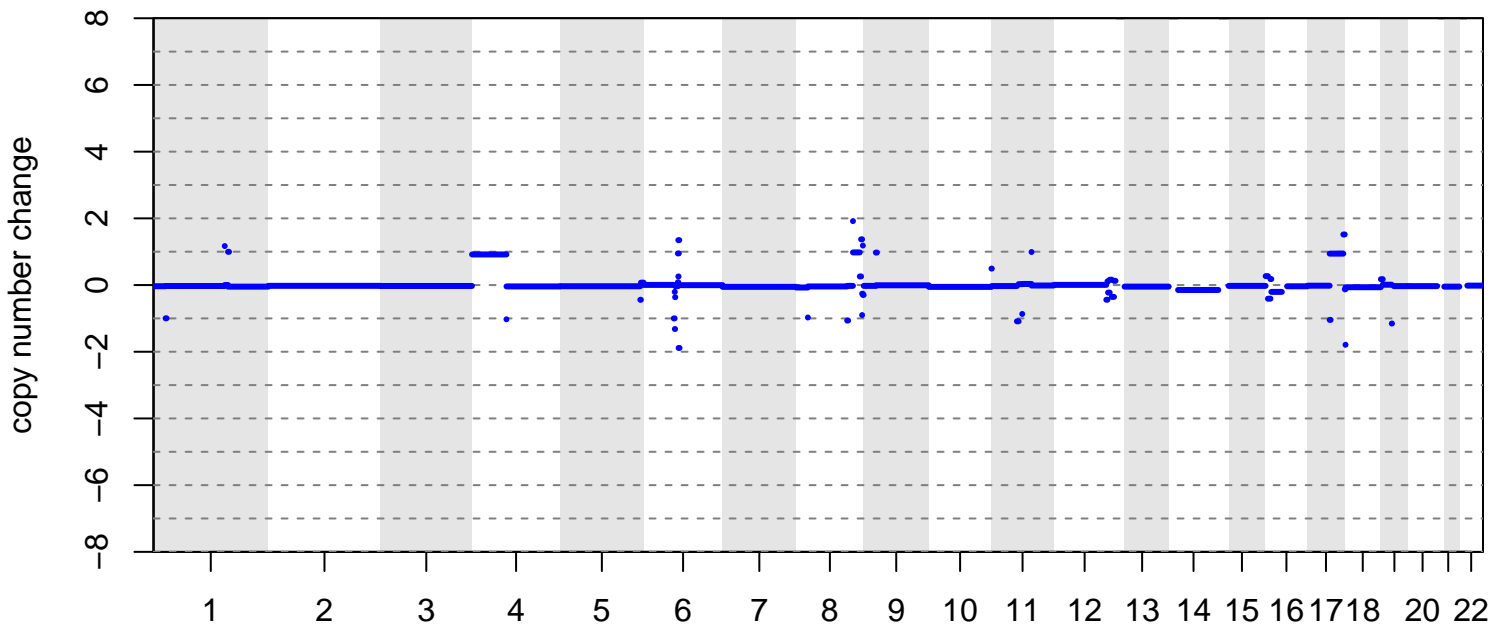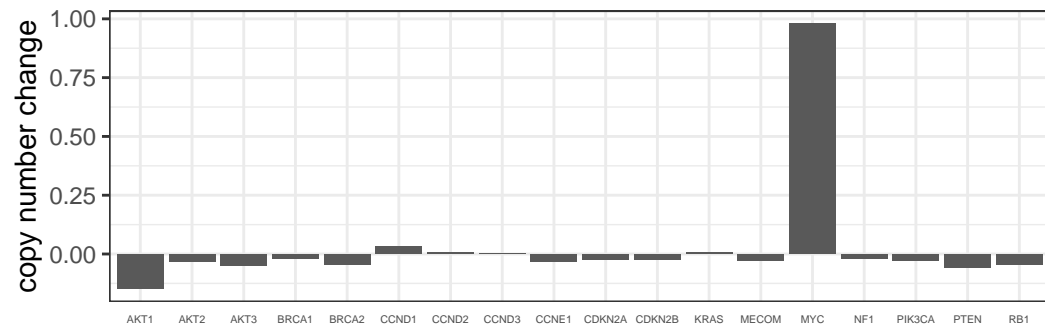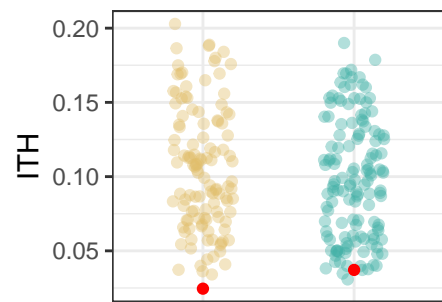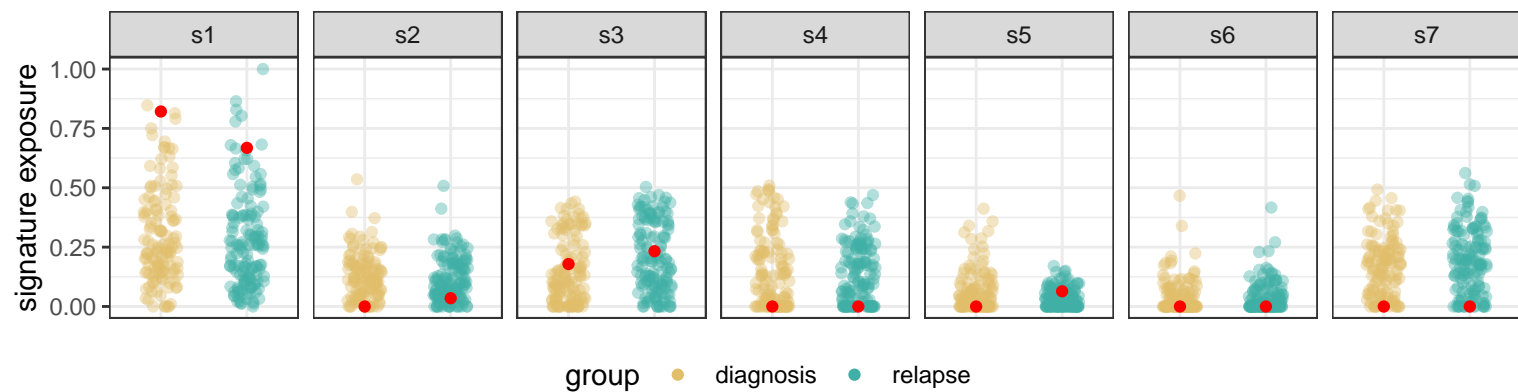

group ● diagnosis ● relapse

BRITROC-147

stage: 4NA  
 platinum status: resistant  
 prior lines: 1

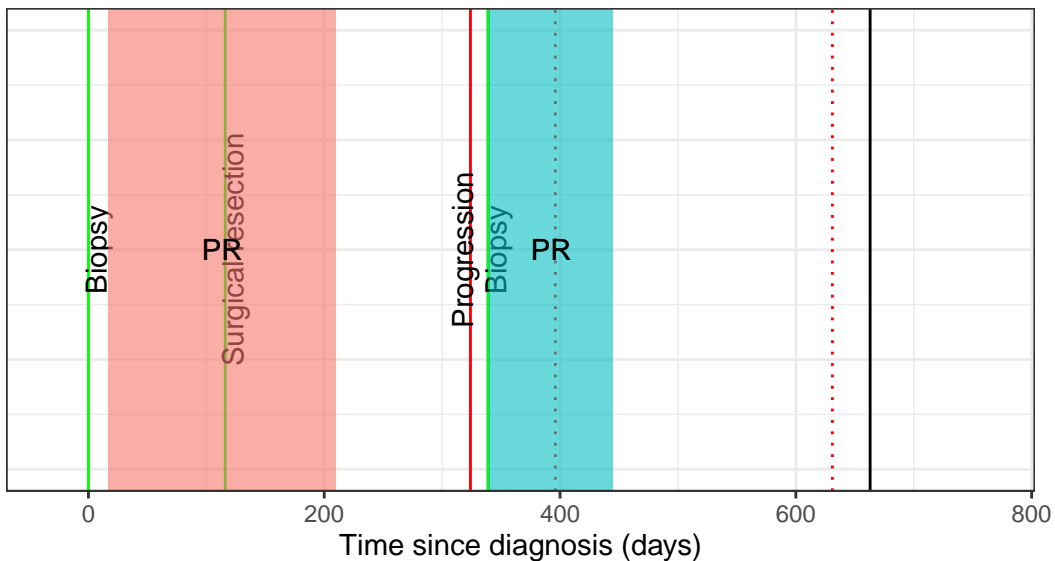

drug ■ Carboplatin ■ Carboplatin + Paclitaxel

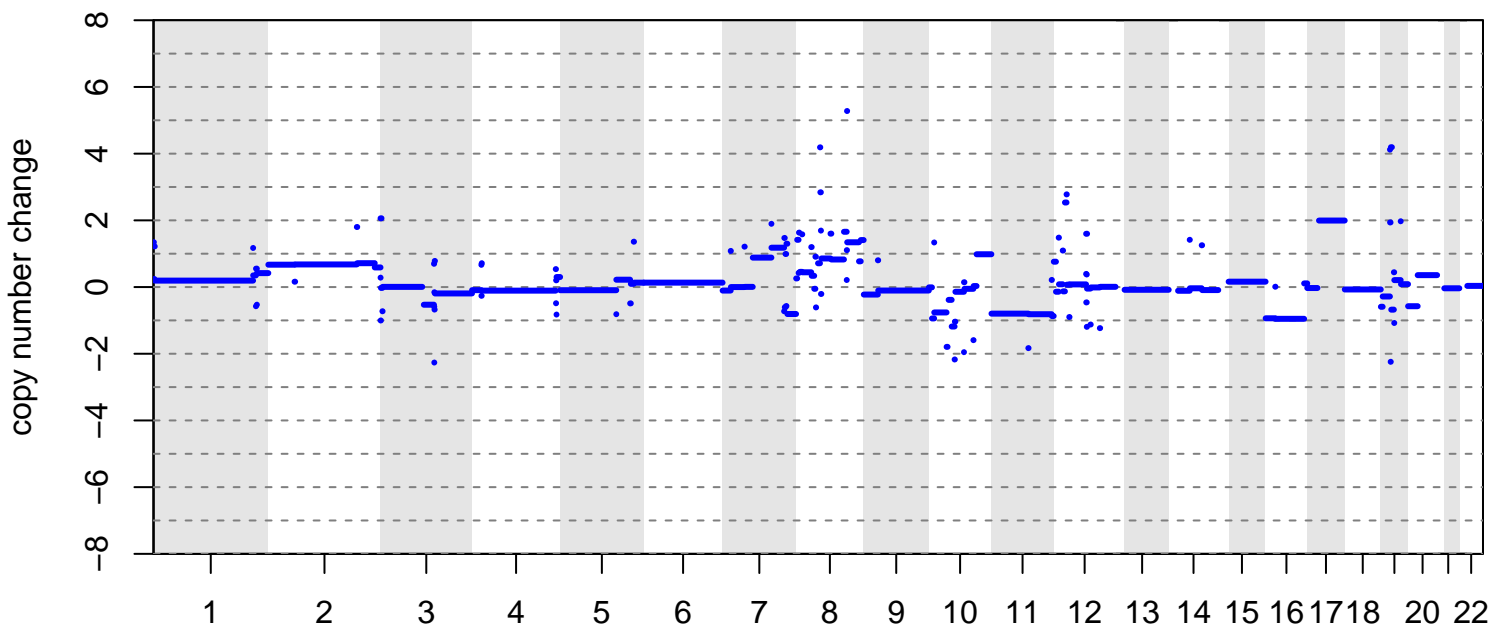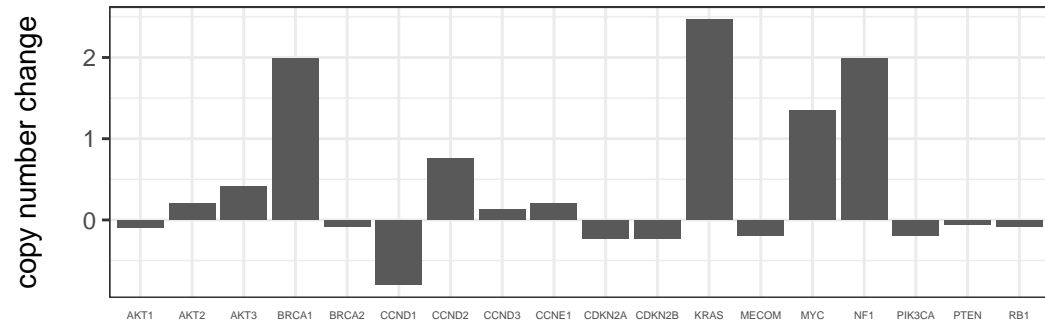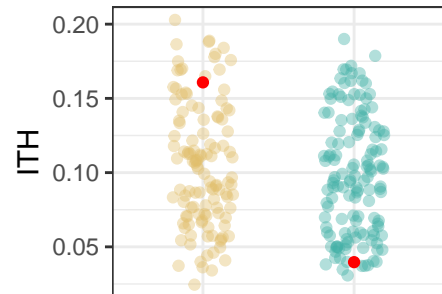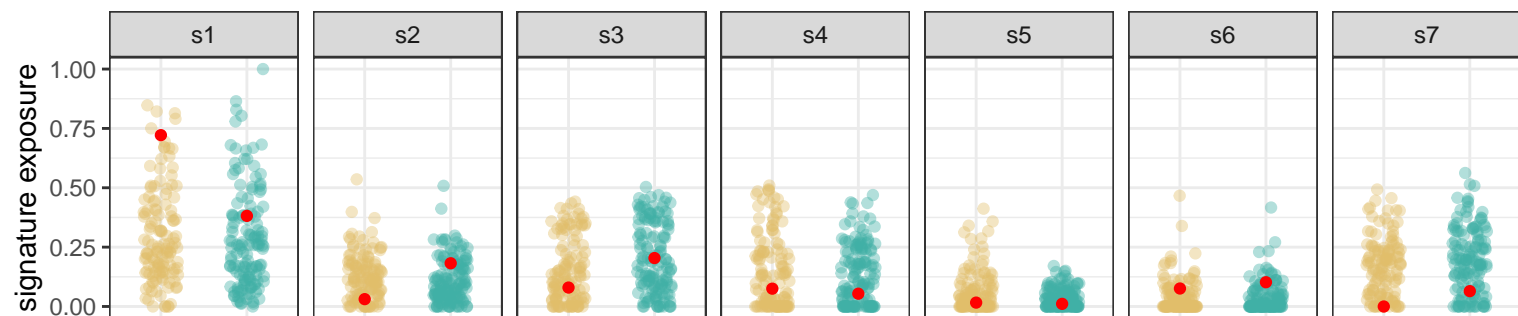

group ● diagnosis ● relapse

BRITROC-148

stage: 4NA  
 platinum status: resistant  
 prior lines: 2

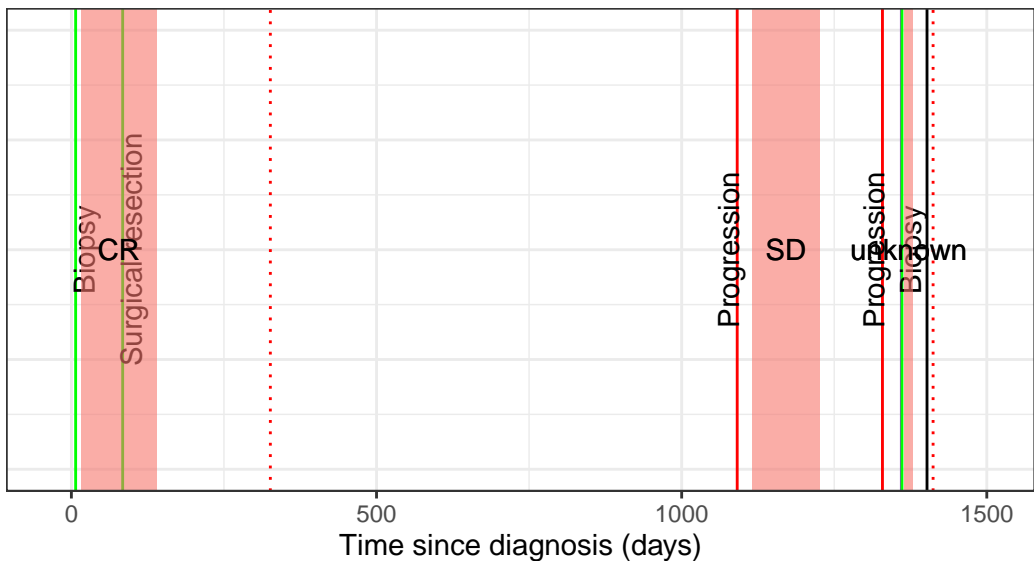

drug Carboplatin + Paclitaxel

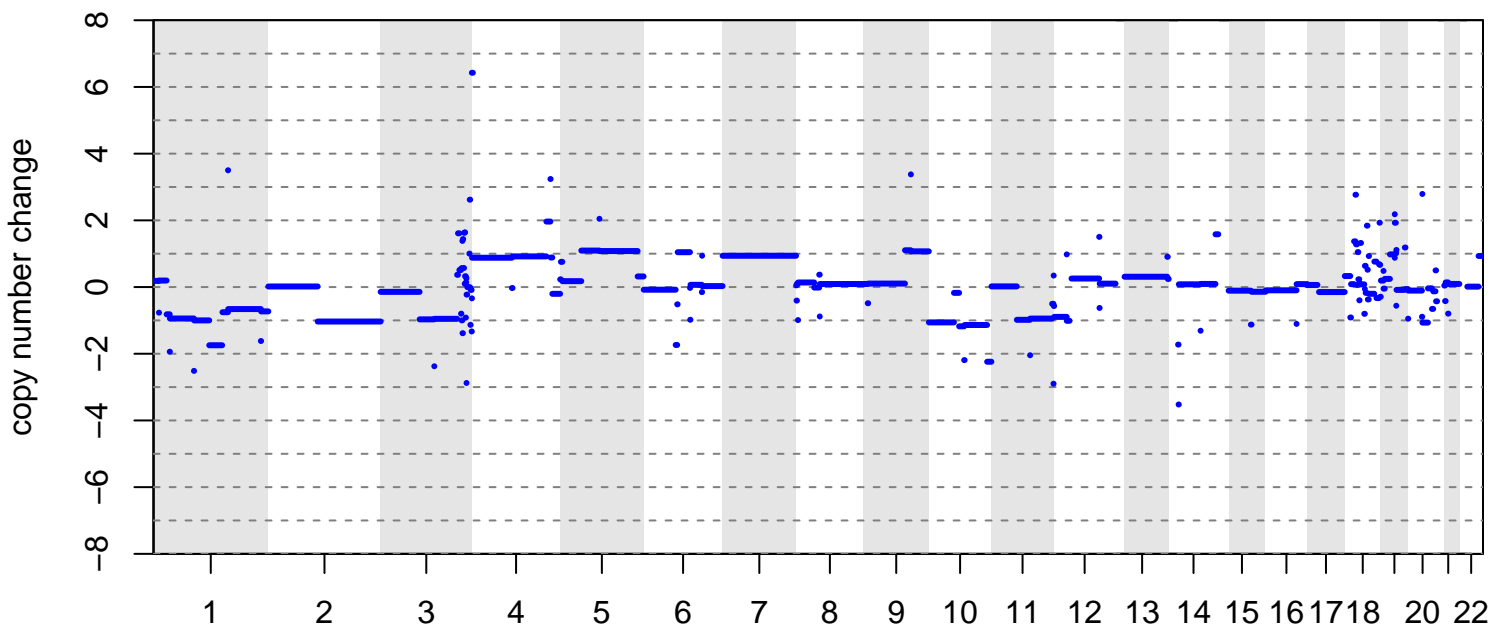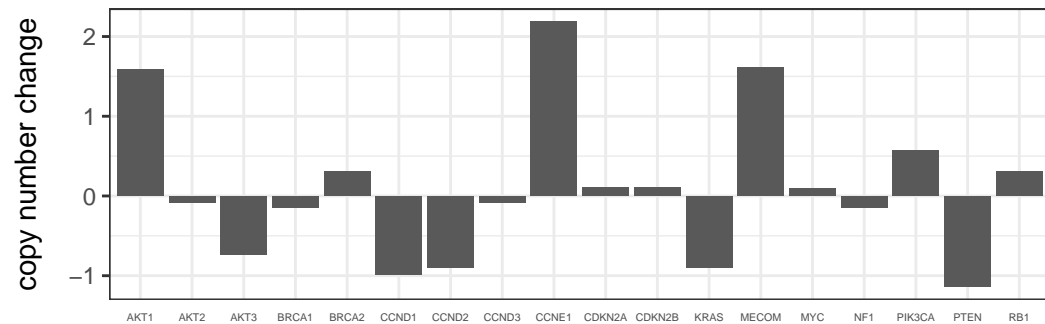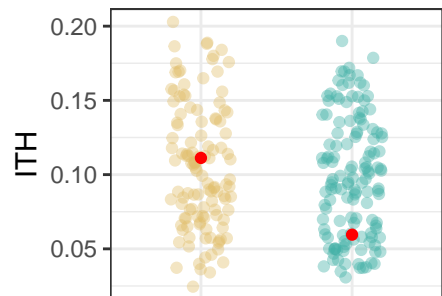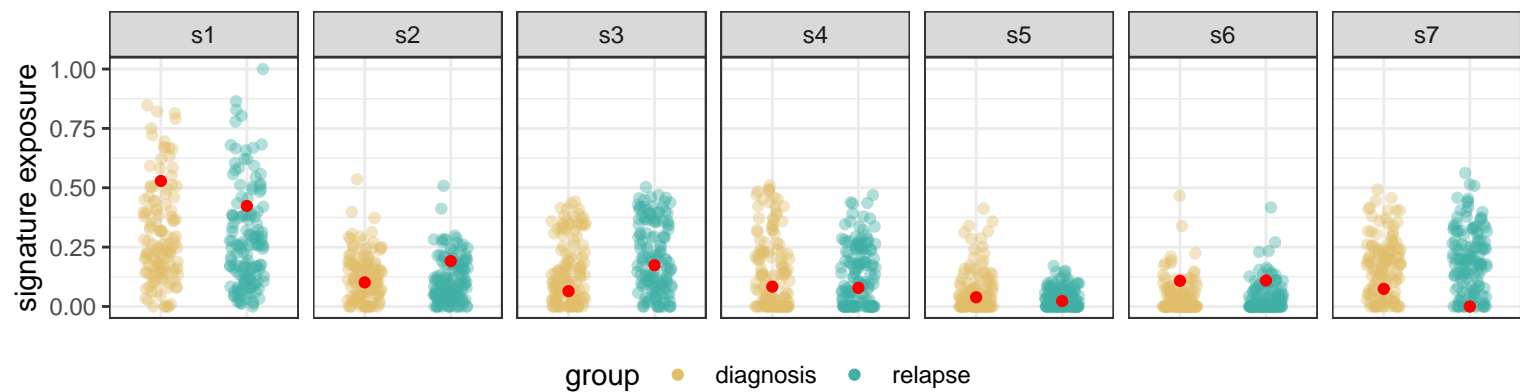

group diagnosis relapse

BRITROC-157

stage: 4NA  
 platinum status: sensitive  
 prior lines: 1

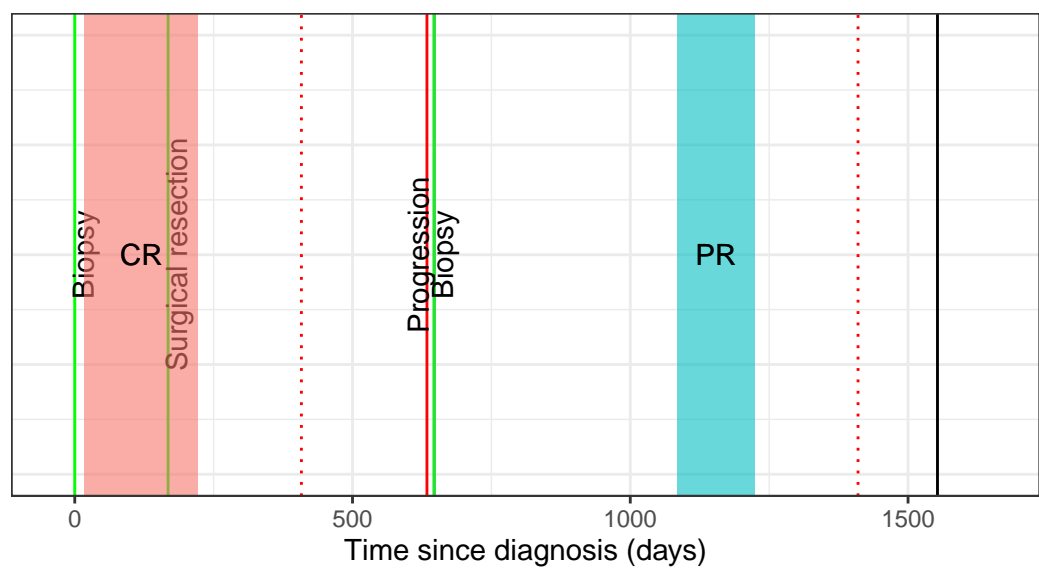

drug ■ Carboplatin ■ Carboplatin + PLD

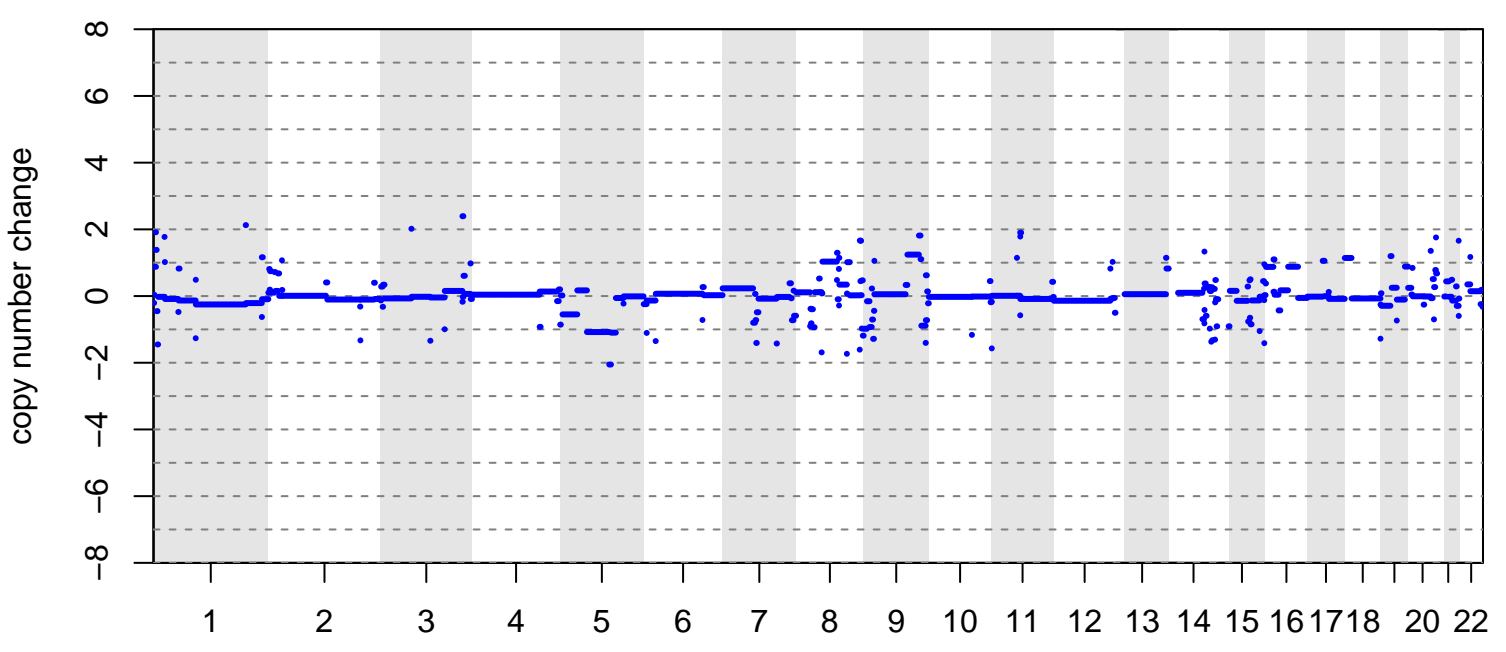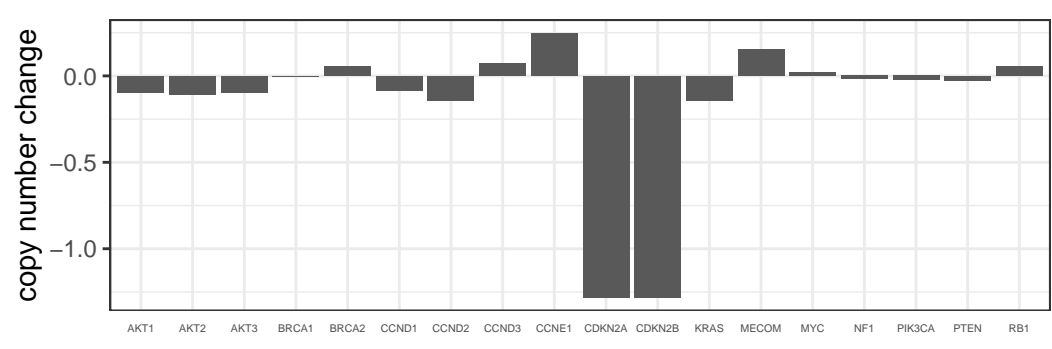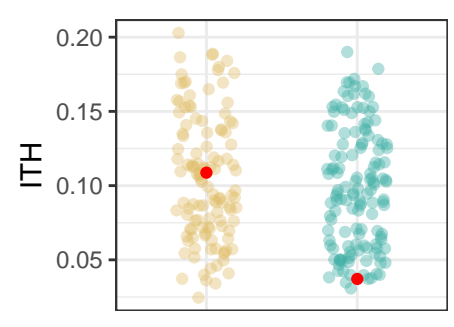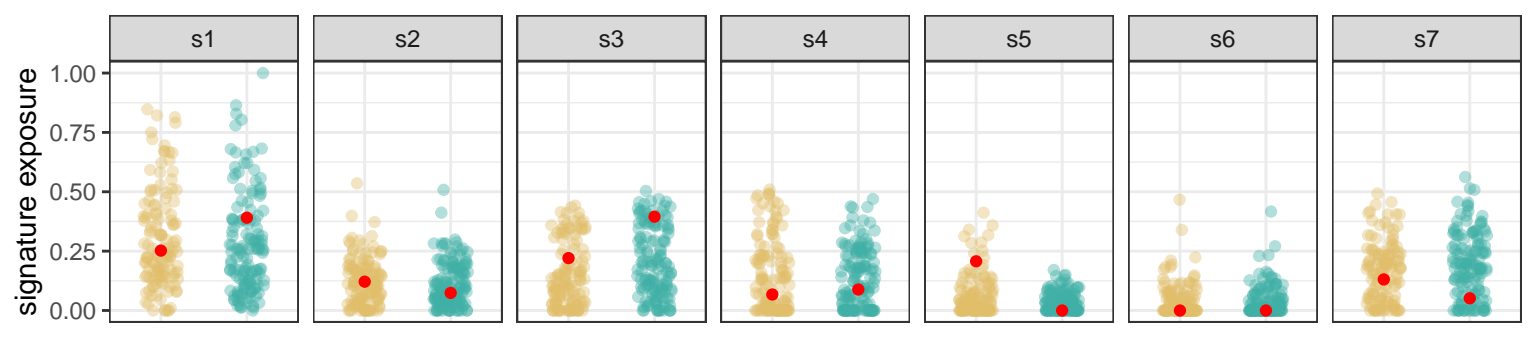

group ● diagnosis ● relapse



# BRITROC-187

stage: 1A  
platinum status: sensitive  
prior lines: 1

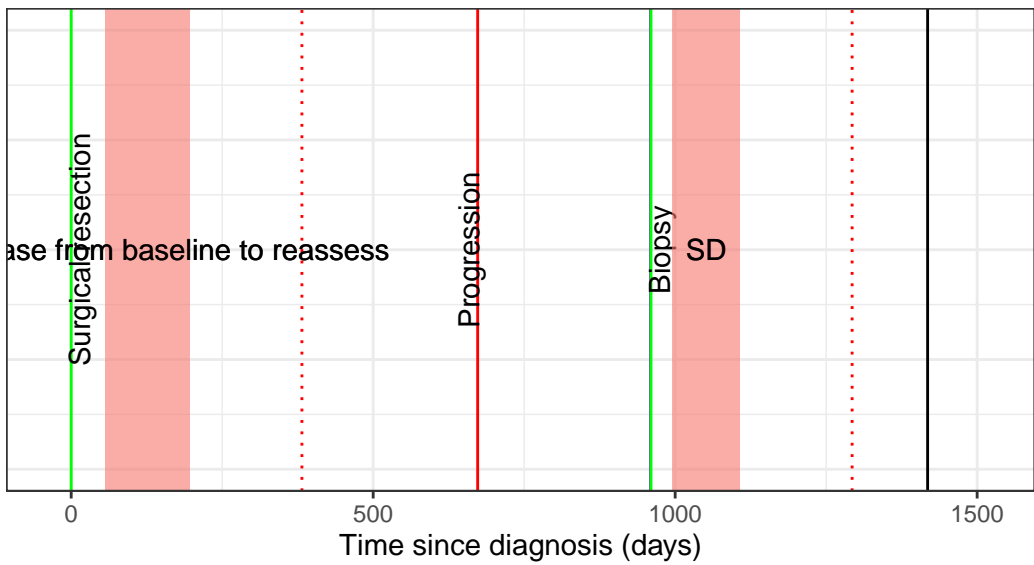

drug ■ Carboplatin

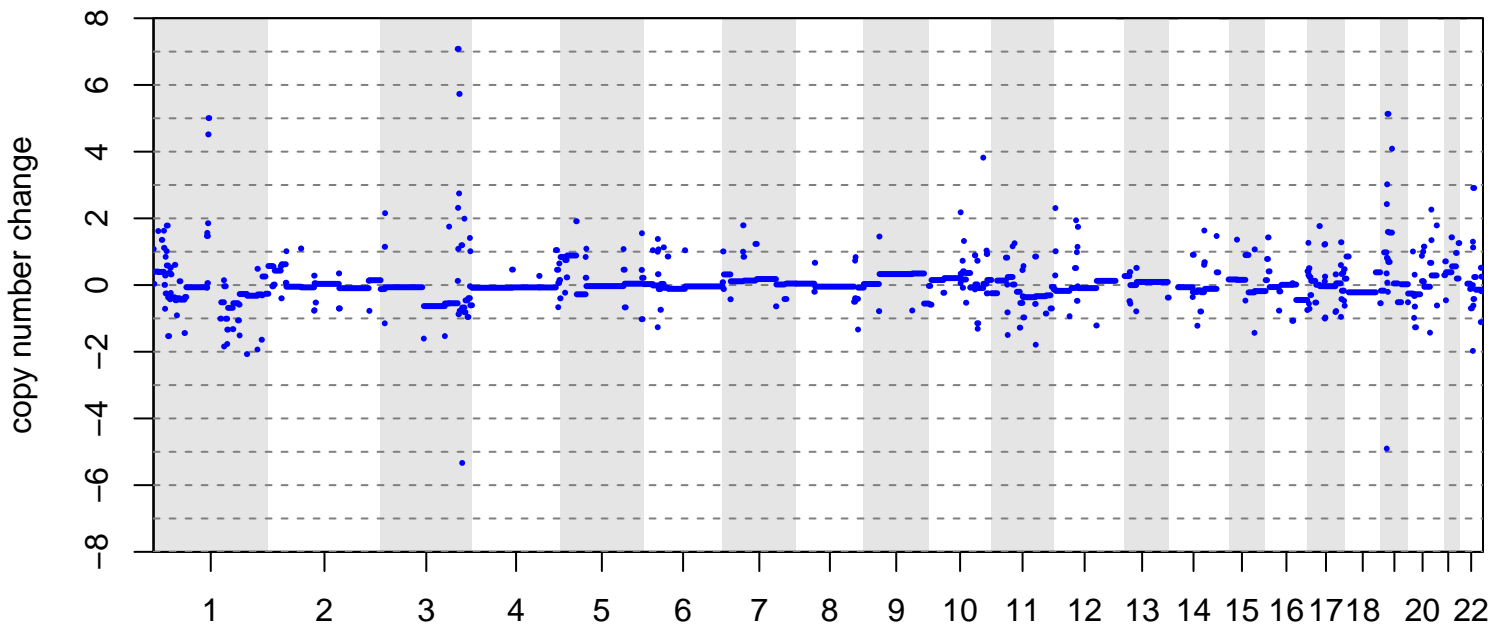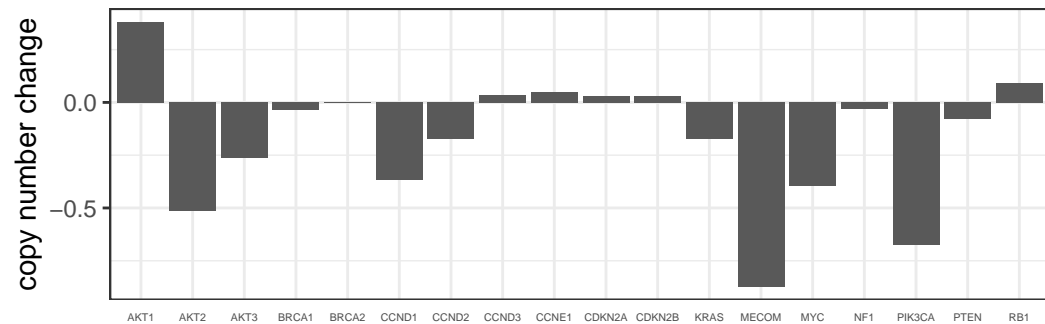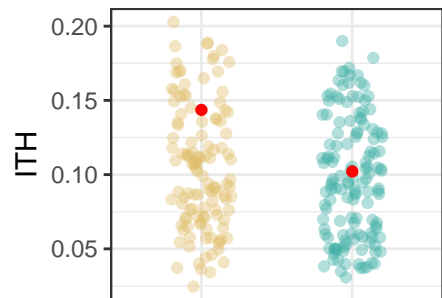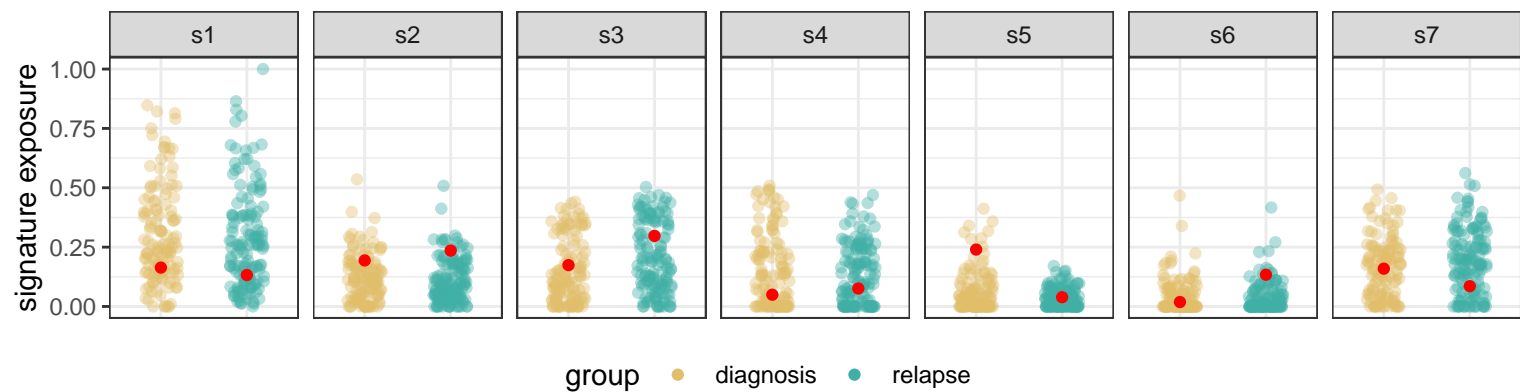

BRITROC-192

stage: 3C

platinum status: sensitive

prior lines: 1

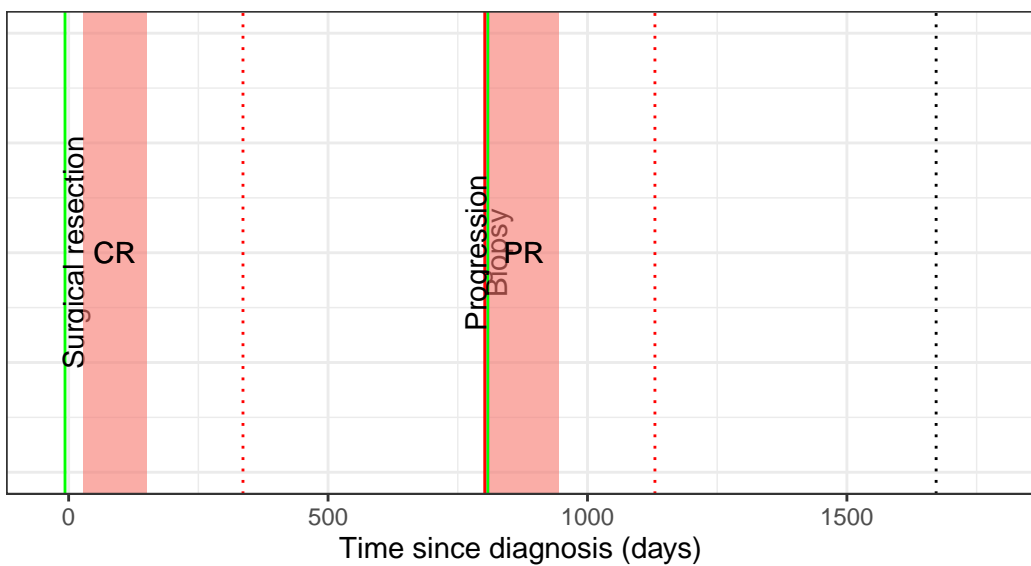

drug ■ Carboplatin + Paclitaxel

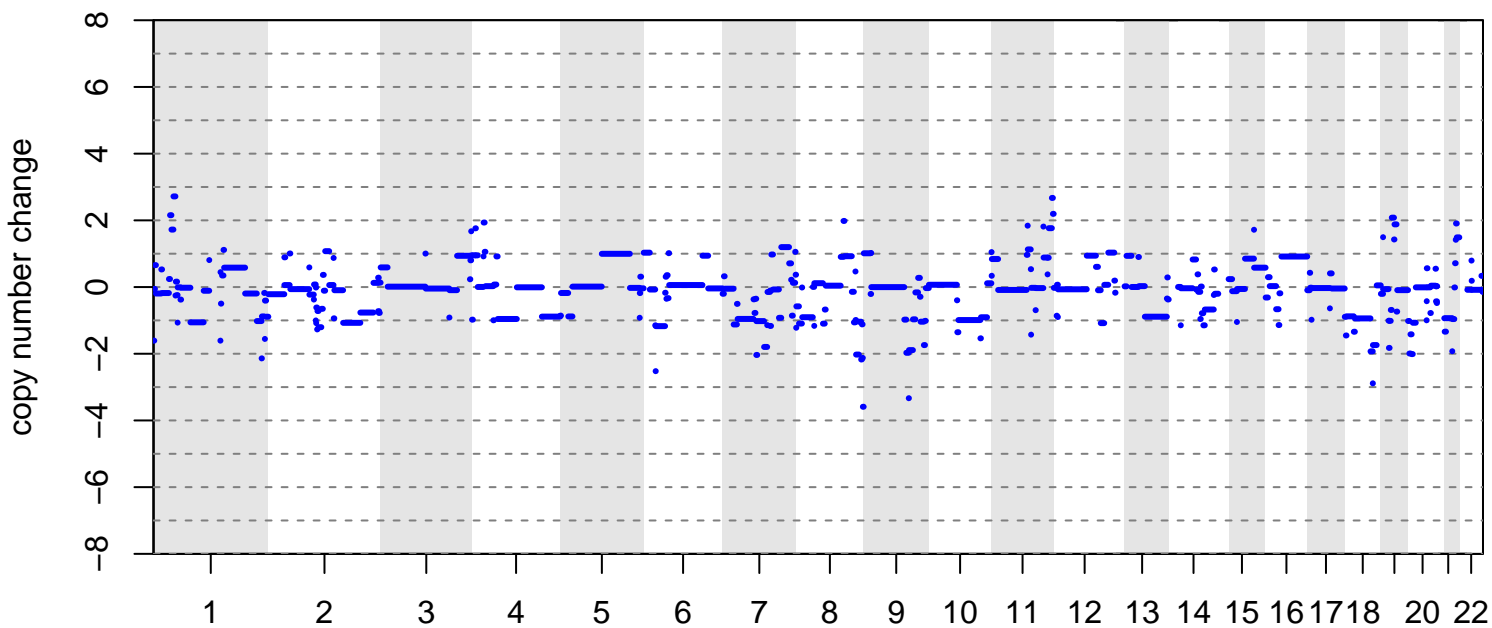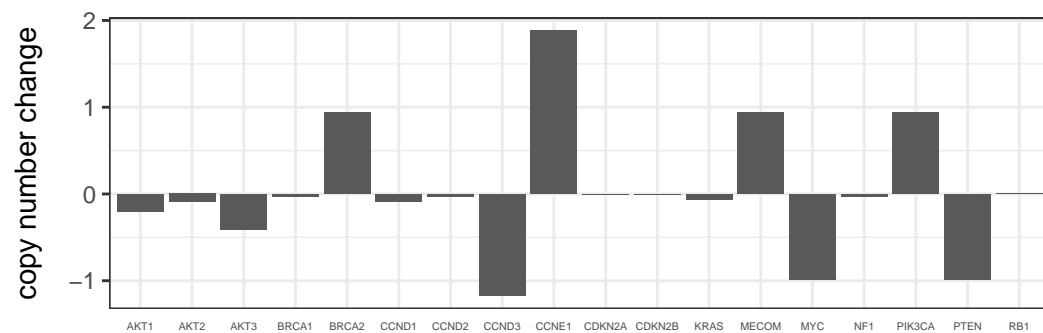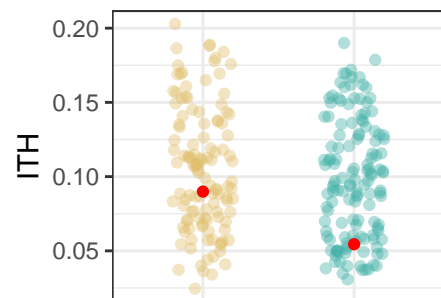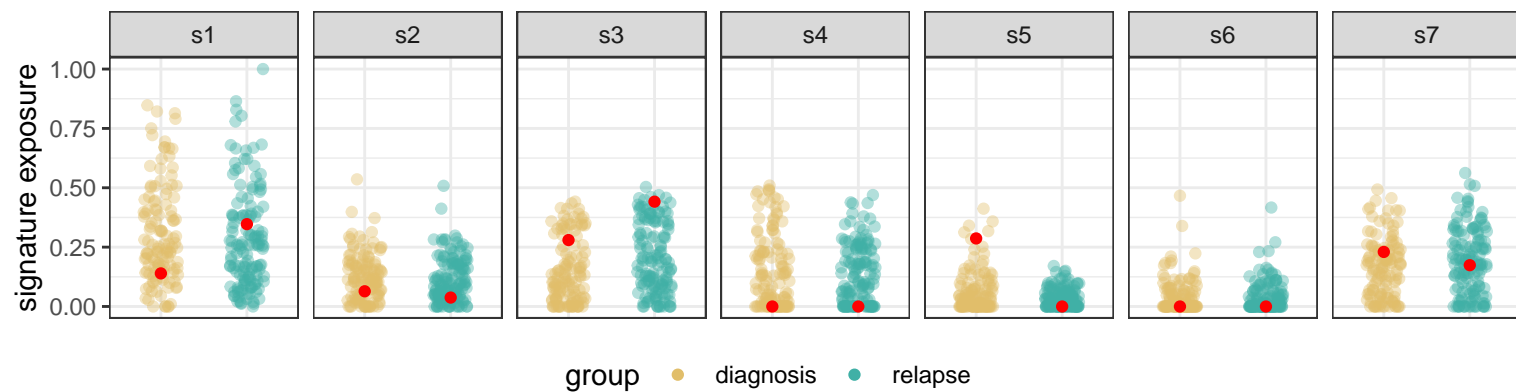

# BRITROC-2

stage: 3C  
platinum status: resistant  
prior lines: 1

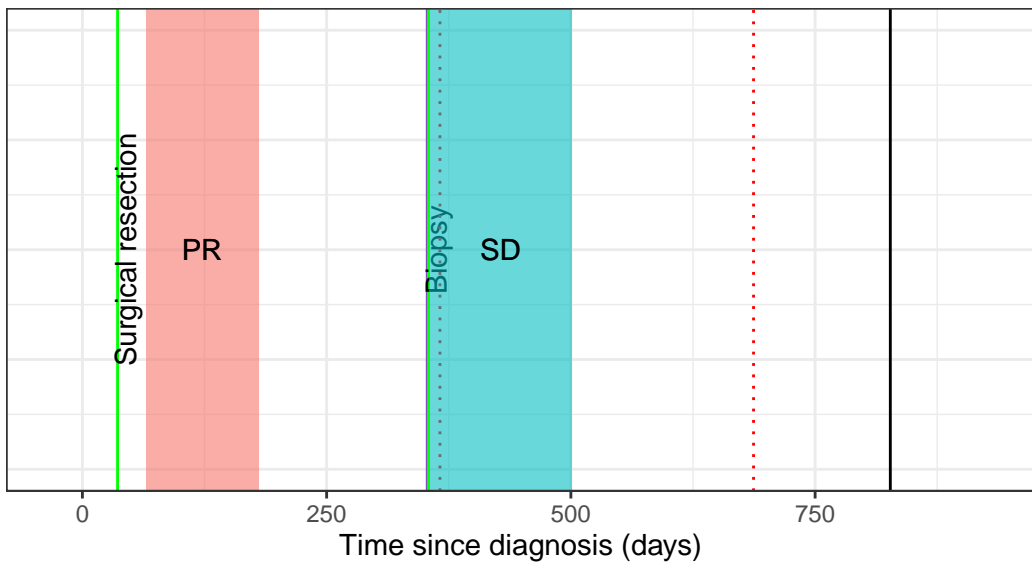

drug ■ Carboplatin + Paclitaxel ■ PLD

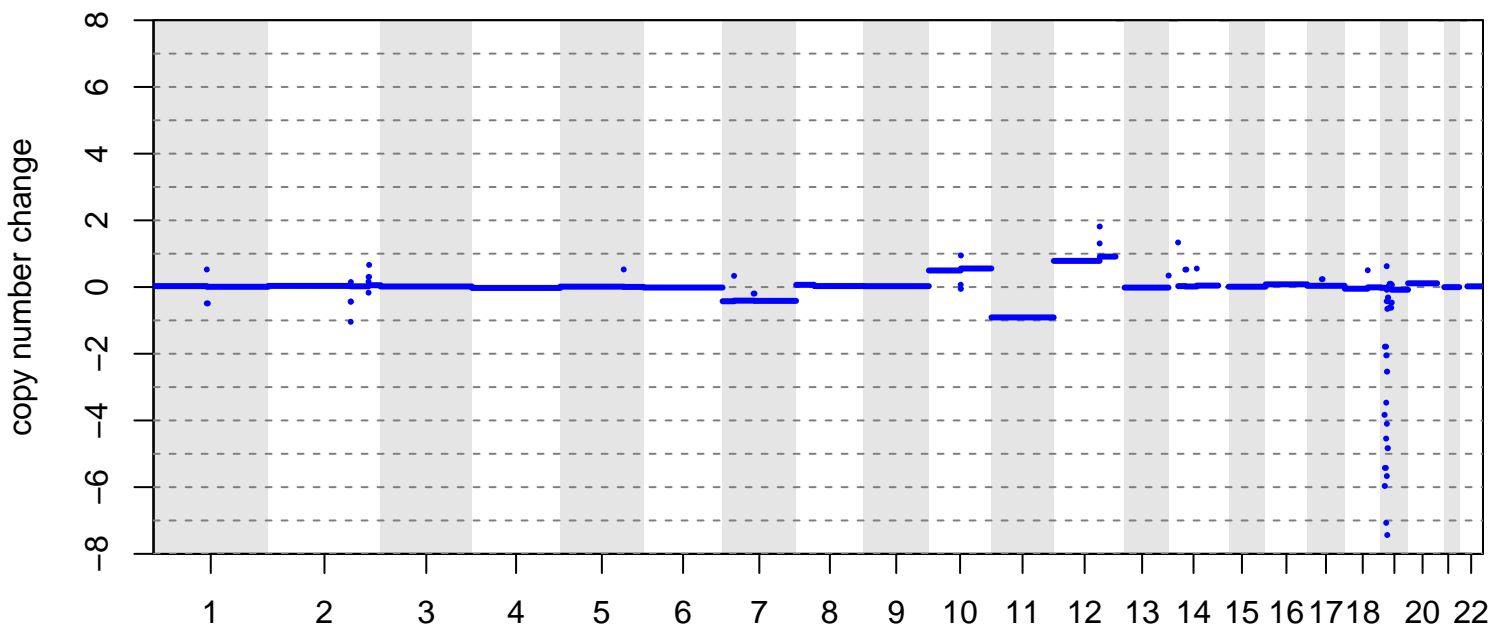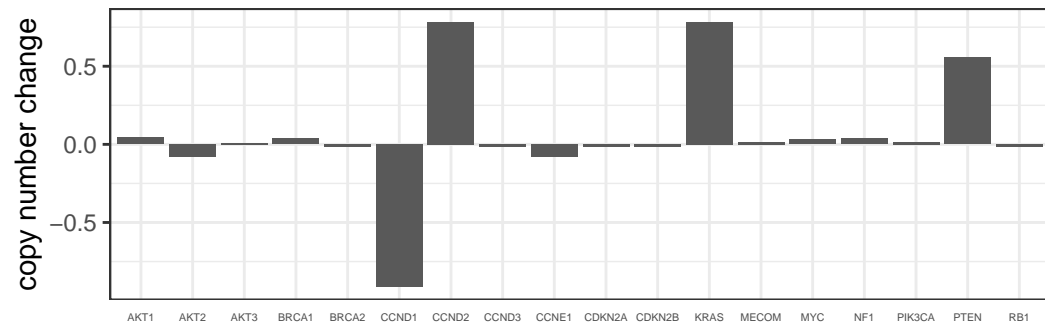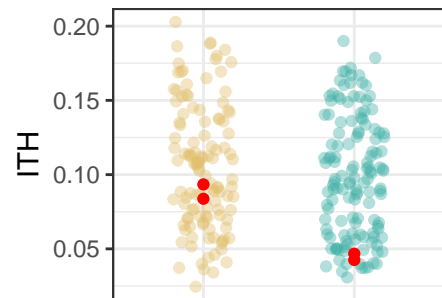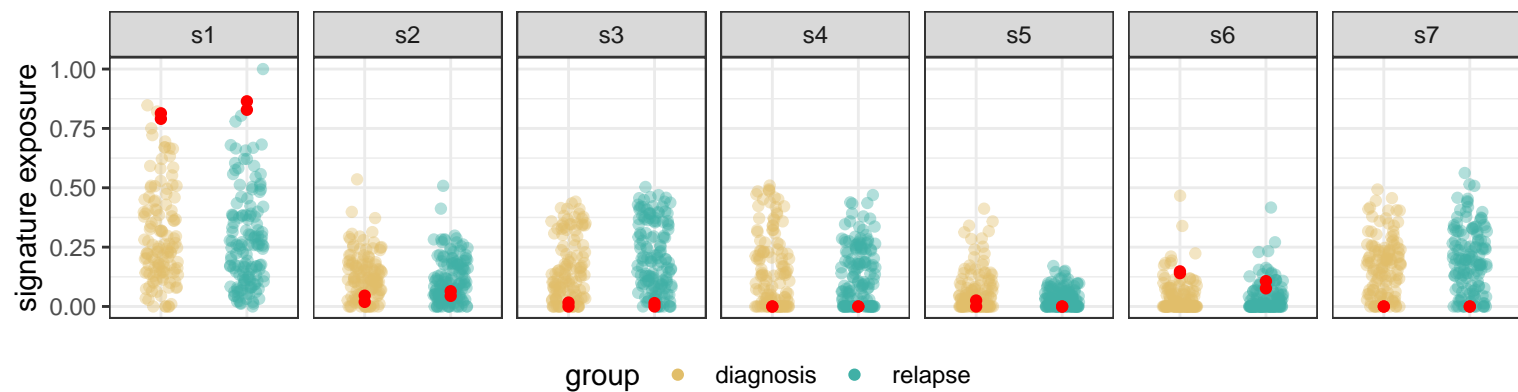

group ● diagnosis ● relapse

BRITROC-204

stage: 2B  
 platinum status: sensitive  
 prior lines: 1

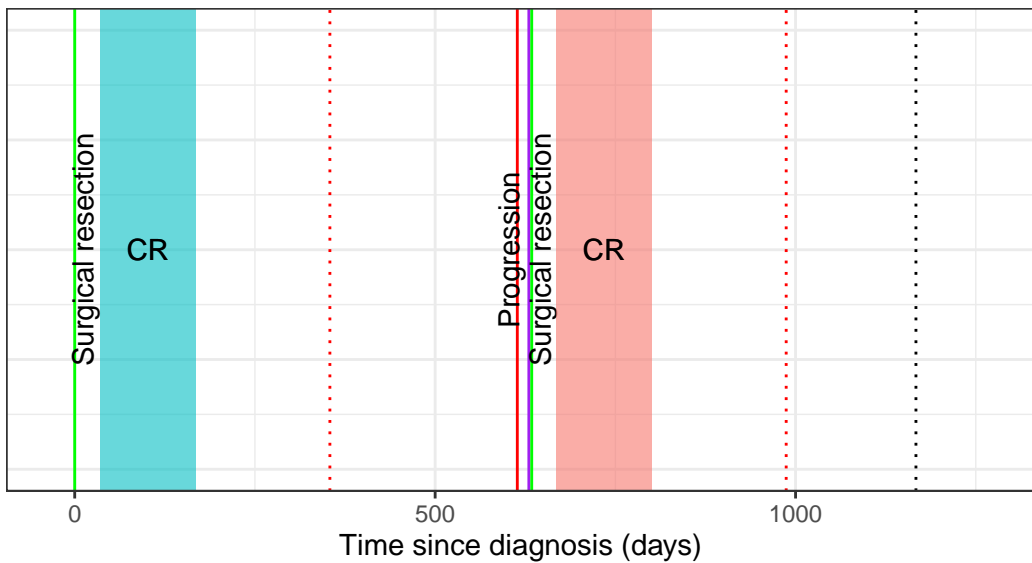

drug ■ Carboplatin + Paclitaxel ■ Carboplatin

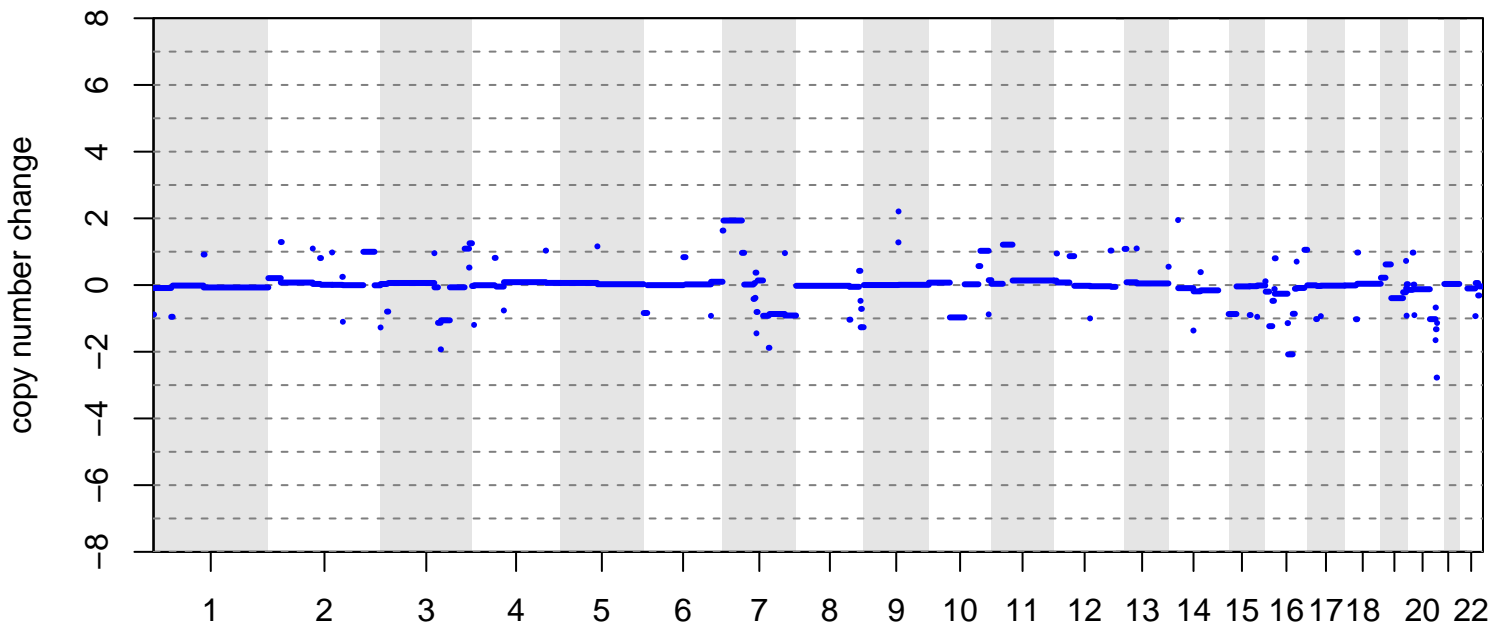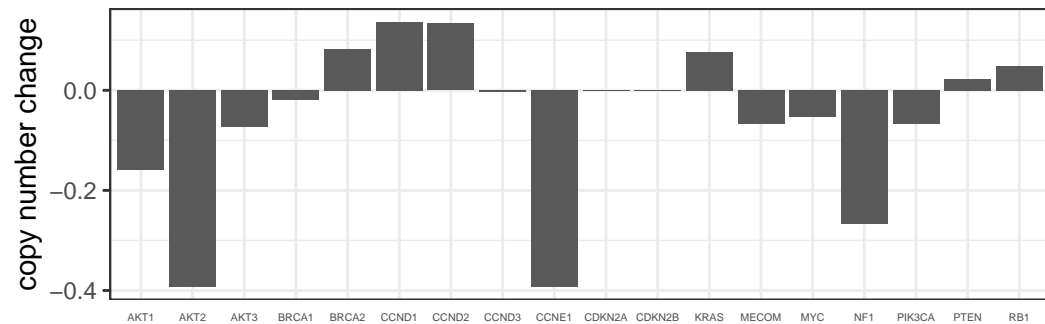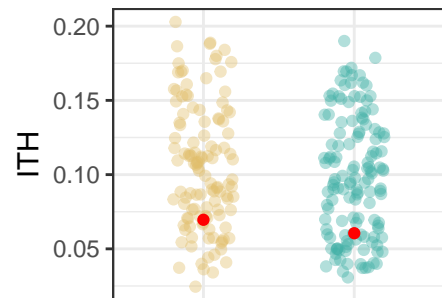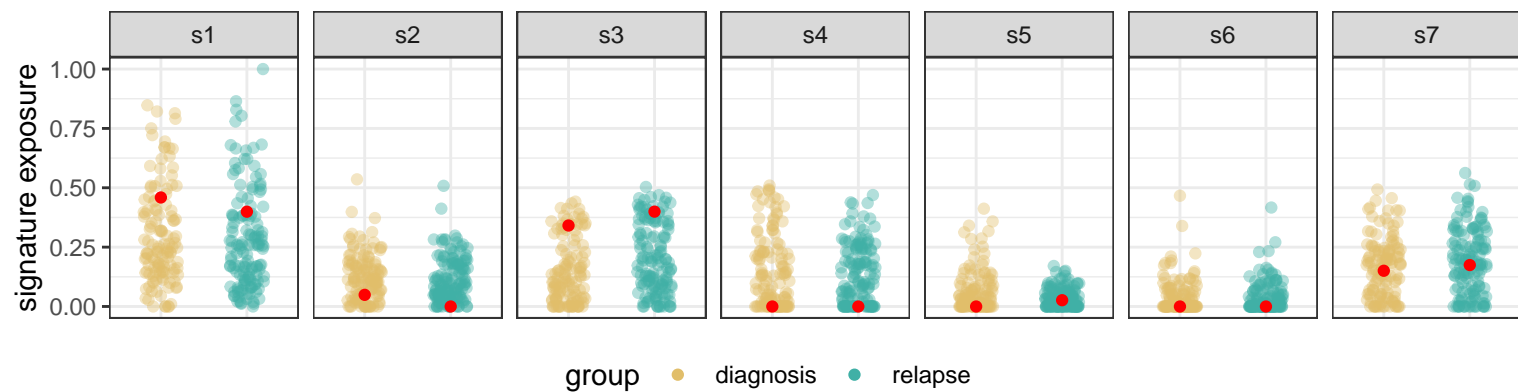

group ● diagnosis ● relapse

# BRITROC-205

stage: 3C  
platinum status: sensitive  
prior lines: 1

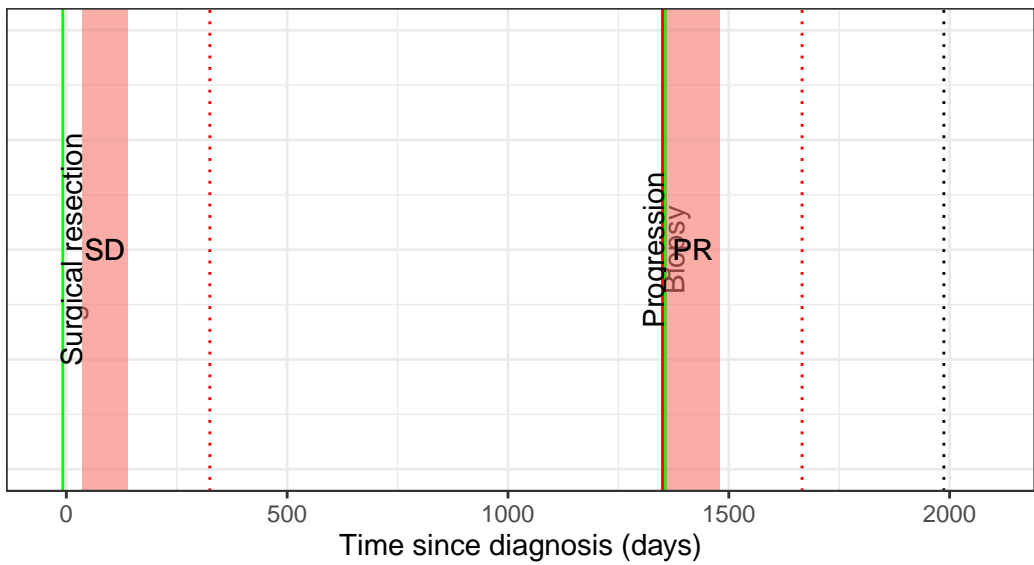

drug ■ Carboplatin + Paclitaxel

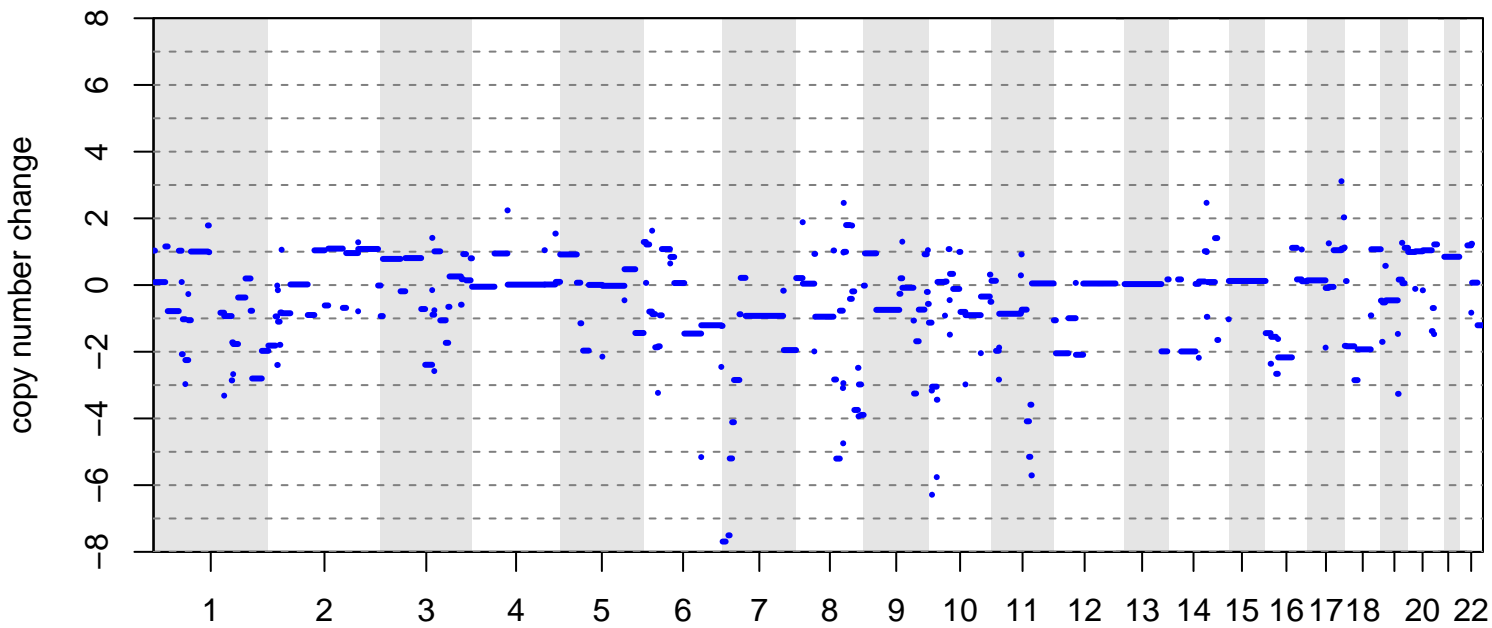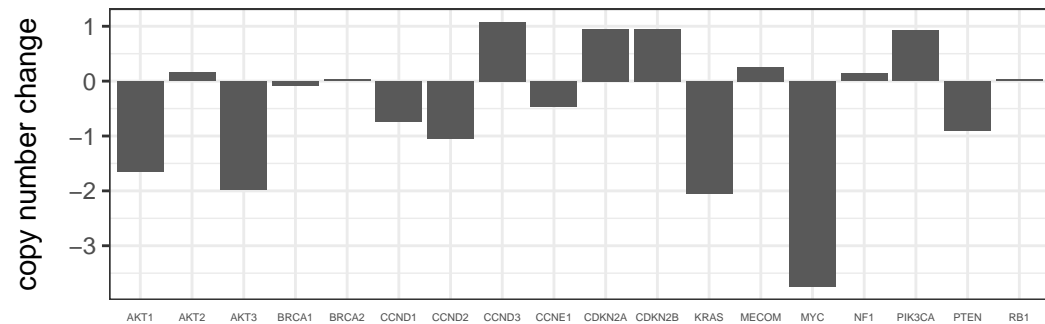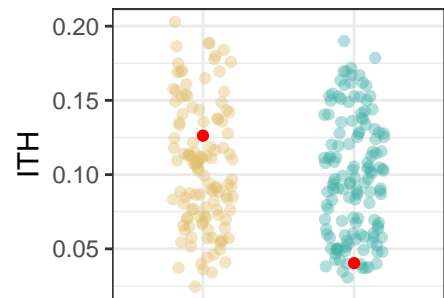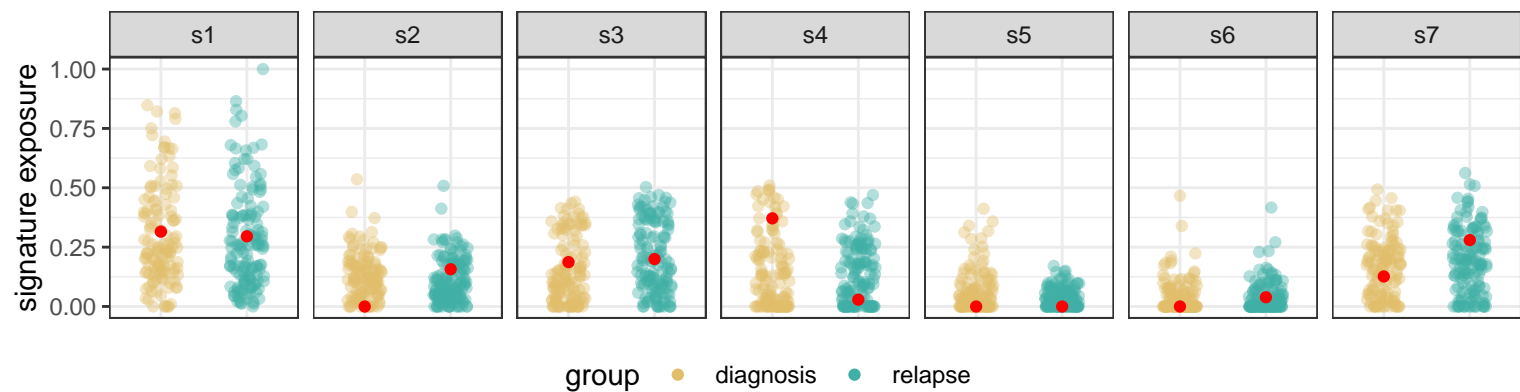

BRITROC-209

stage: 3C  
 platinum status: sensitive  
 prior lines: 1

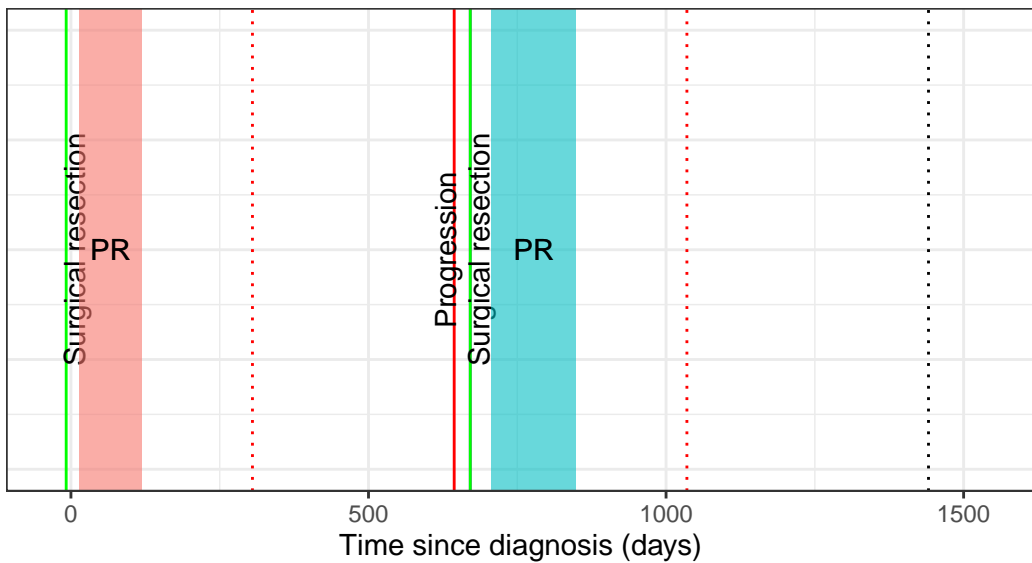

drug ■ Carboplatin + Paclitaxel ■ Carboplatin + PLD

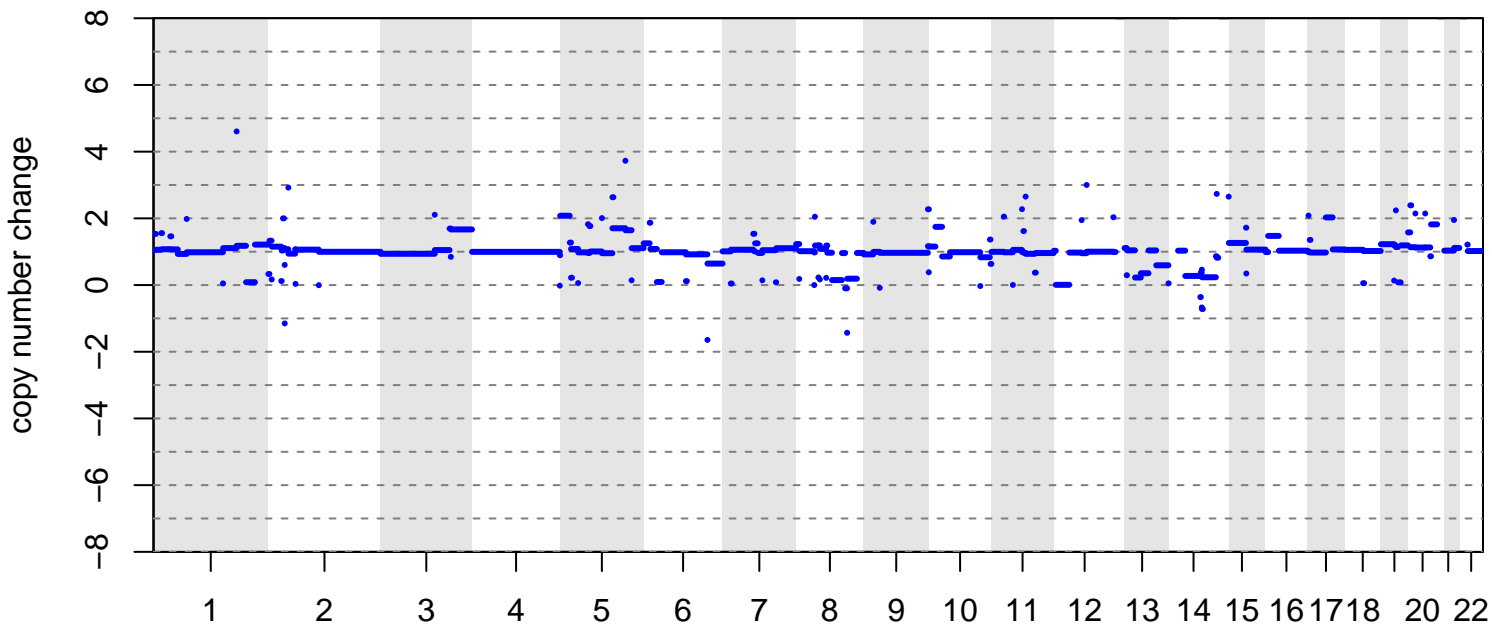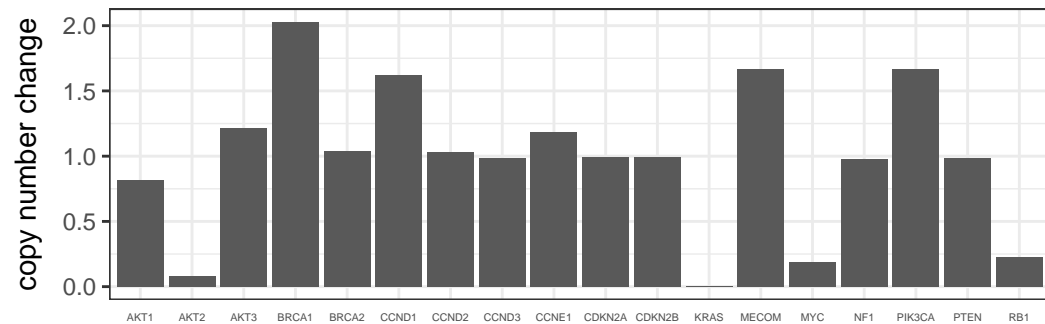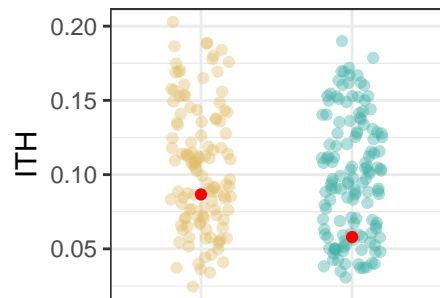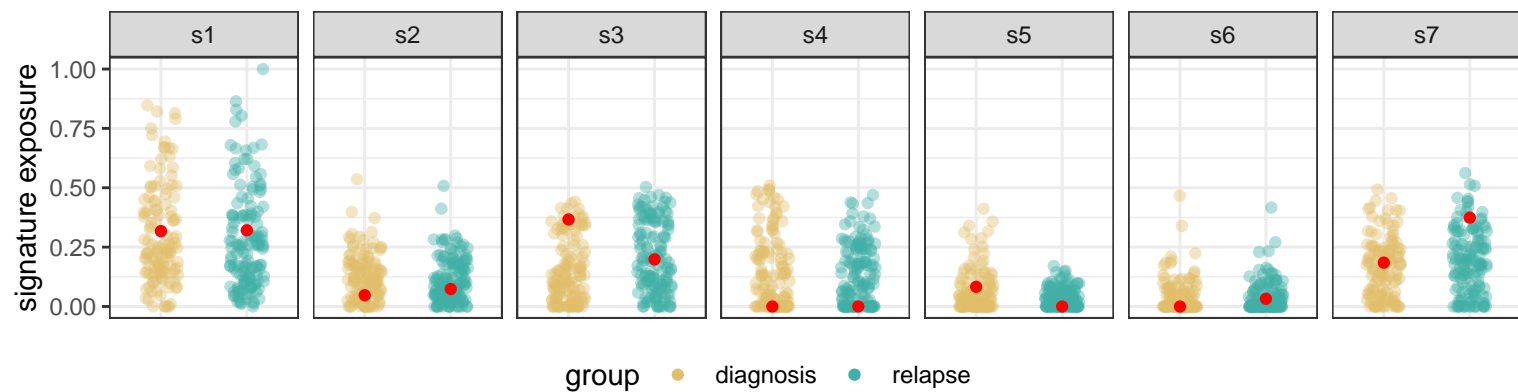

BRITROC-216

stage: 3B

platinum status: sensitive

prior lines: 1

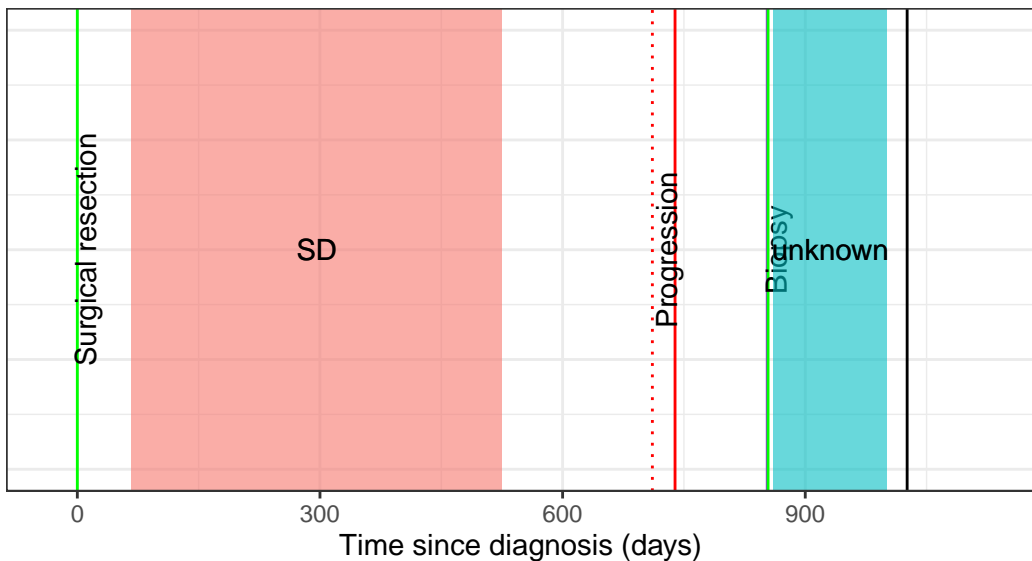

drug ■ Bevacizumab + Carboplatin + Paclitaxel ■ Carboplatin + PLD

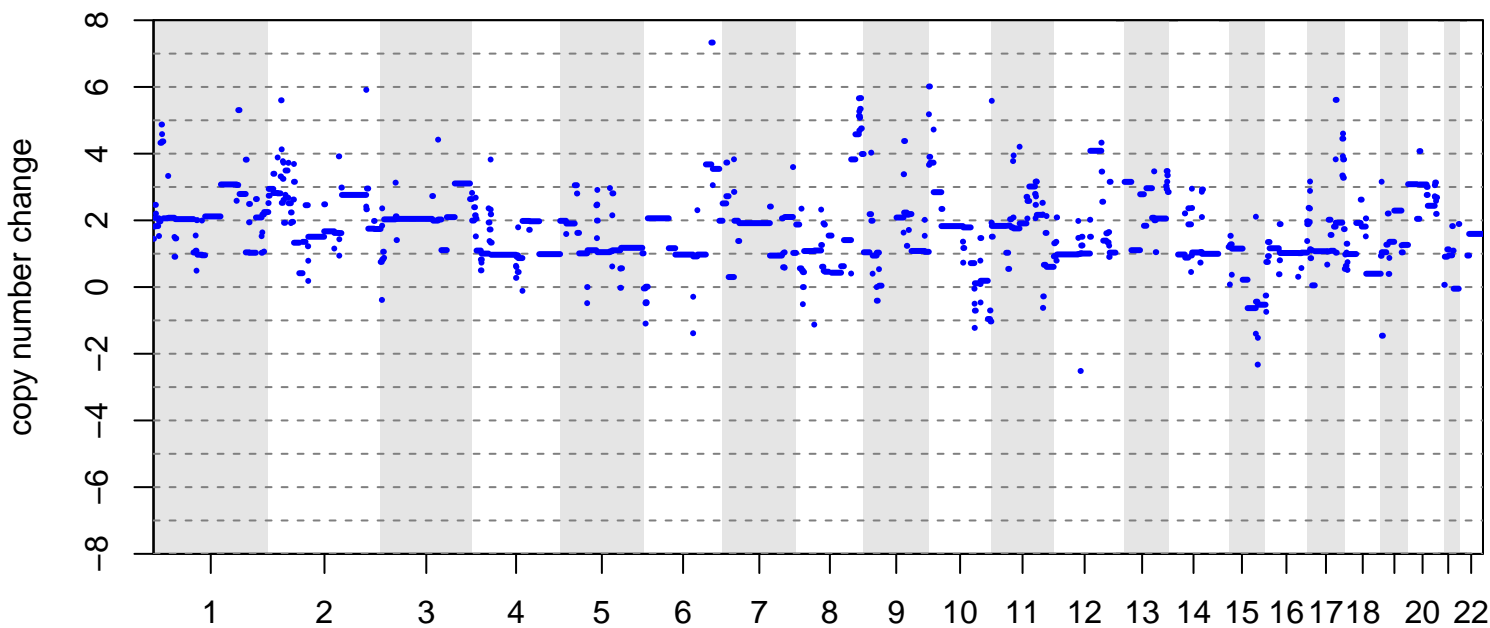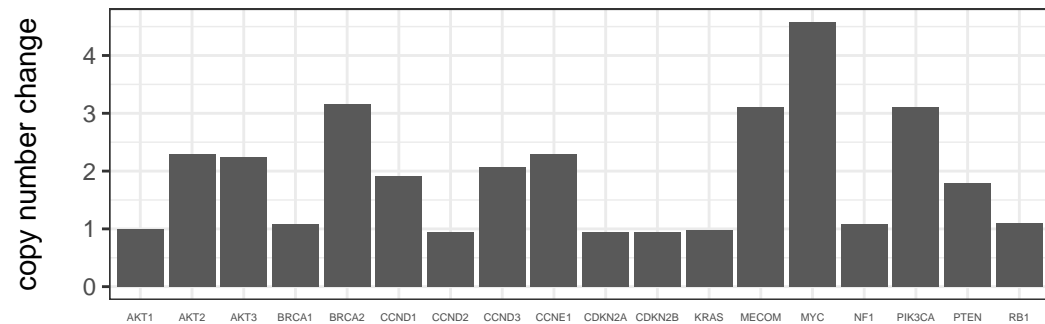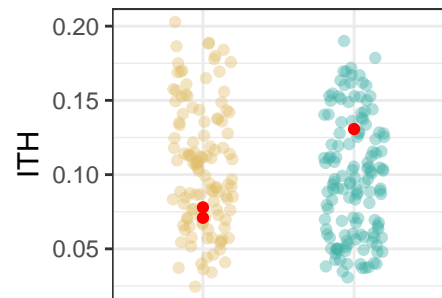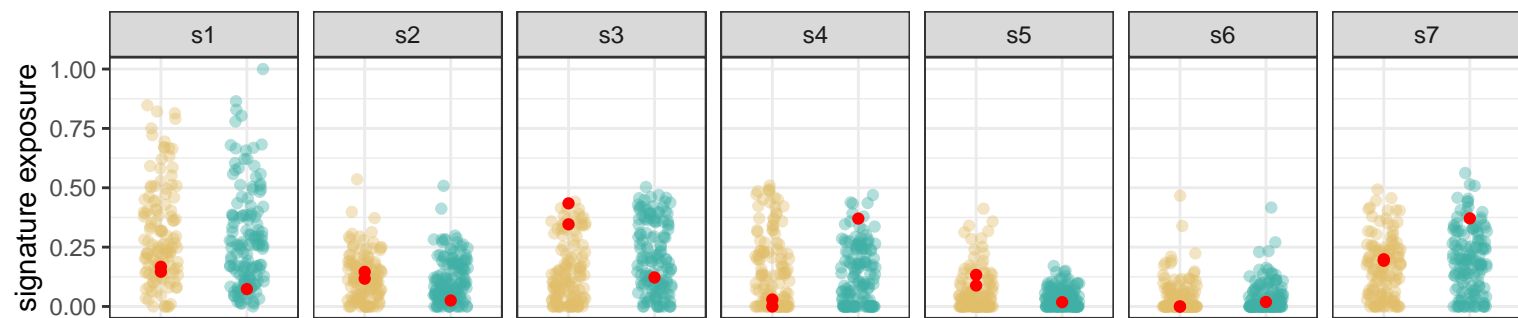

group ● diagnosis ● relapse

# BRITROC-225

stage: 3C  
platinum status: sensitive  
prior lines: 1

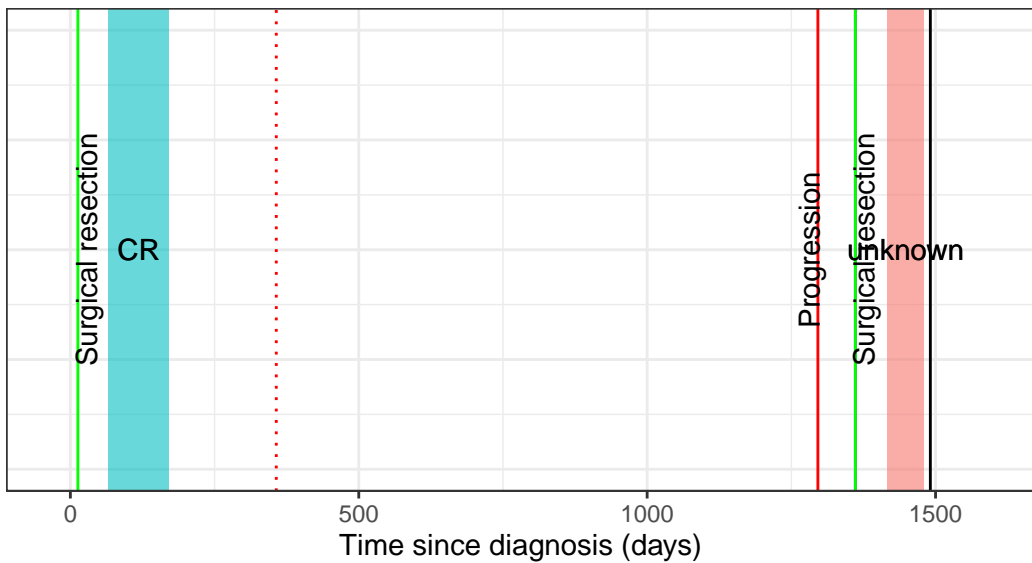

drug ■ Carboplatin + Paclitaxel ■ Carboplatin

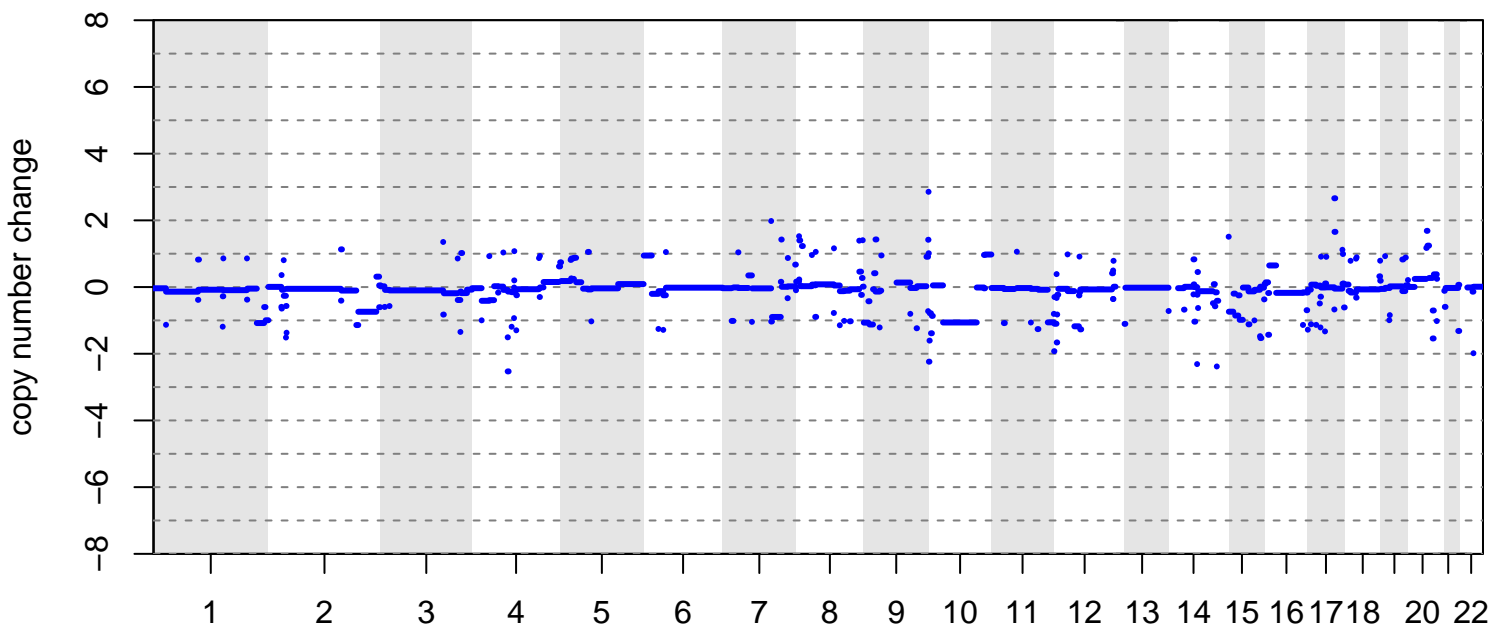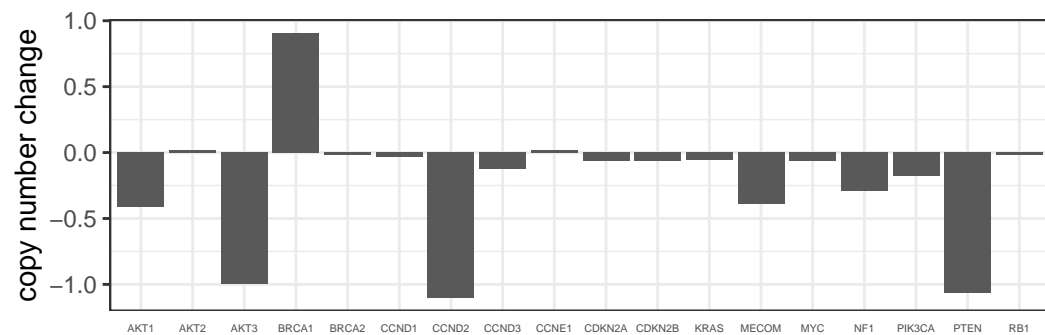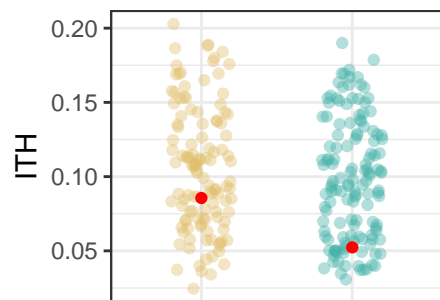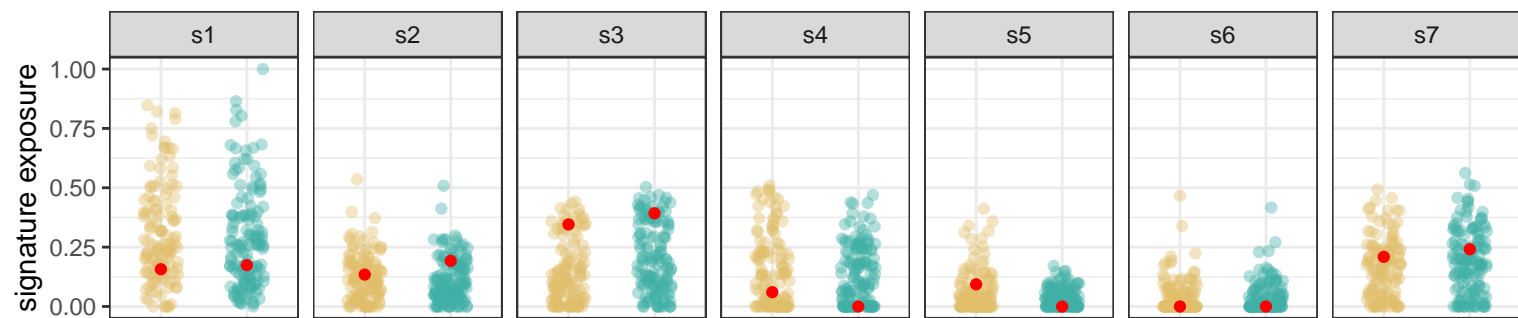

group ● diagnosis ● relapse



# BRITROC-226

stage: 3B

platinum status: sensitive

prior lines: 1

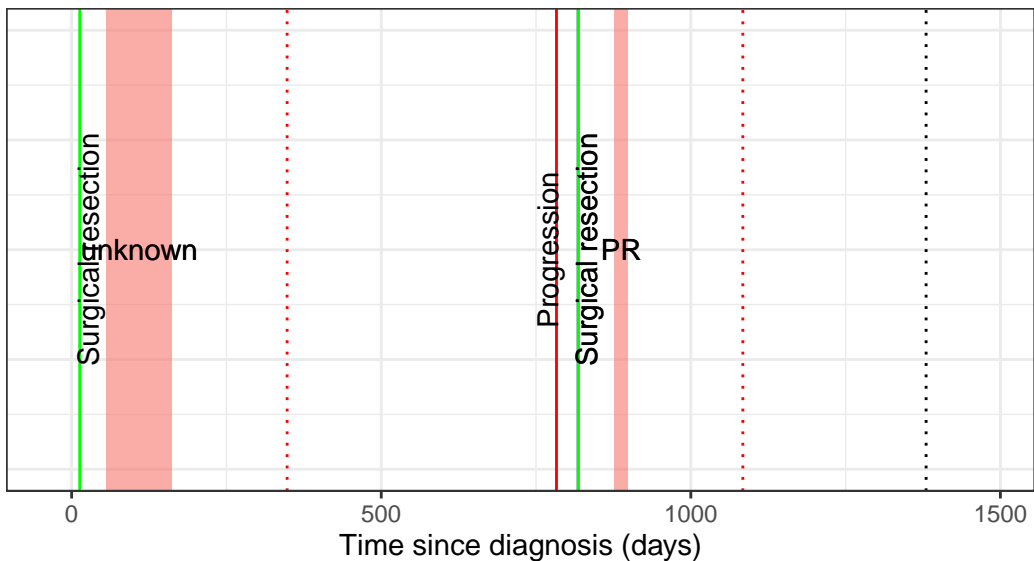

drug ■ Carboplatin + Paclitaxel

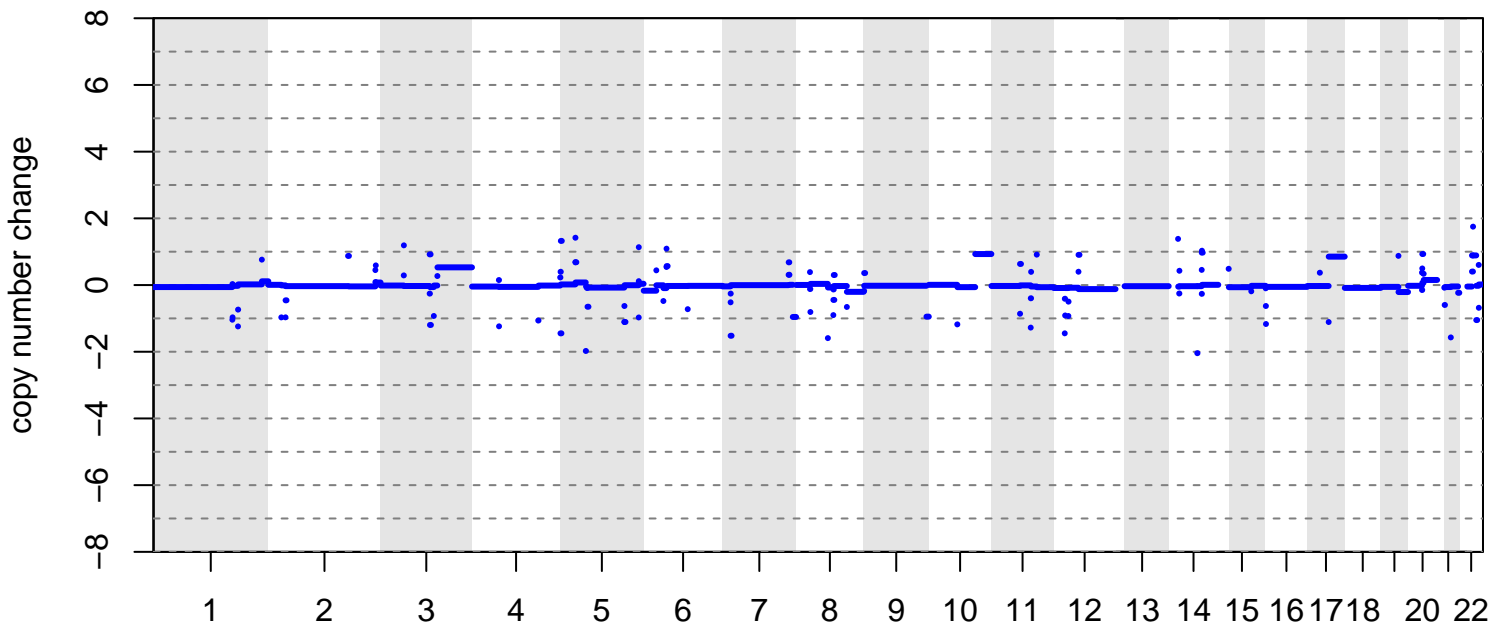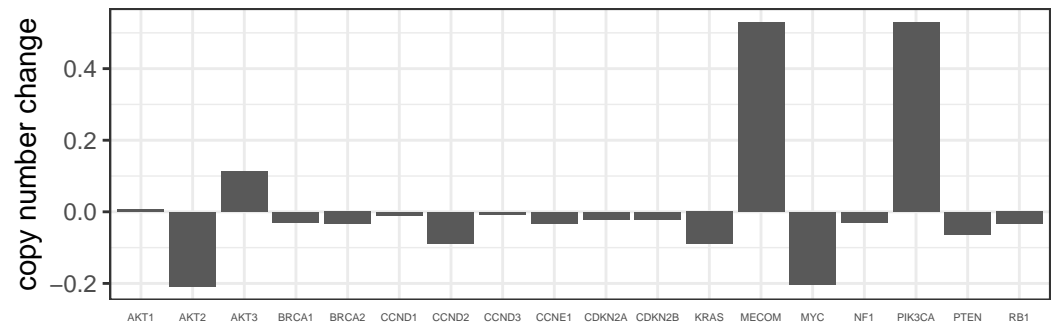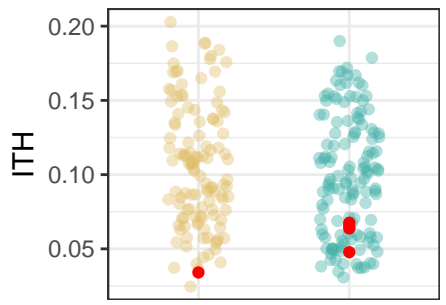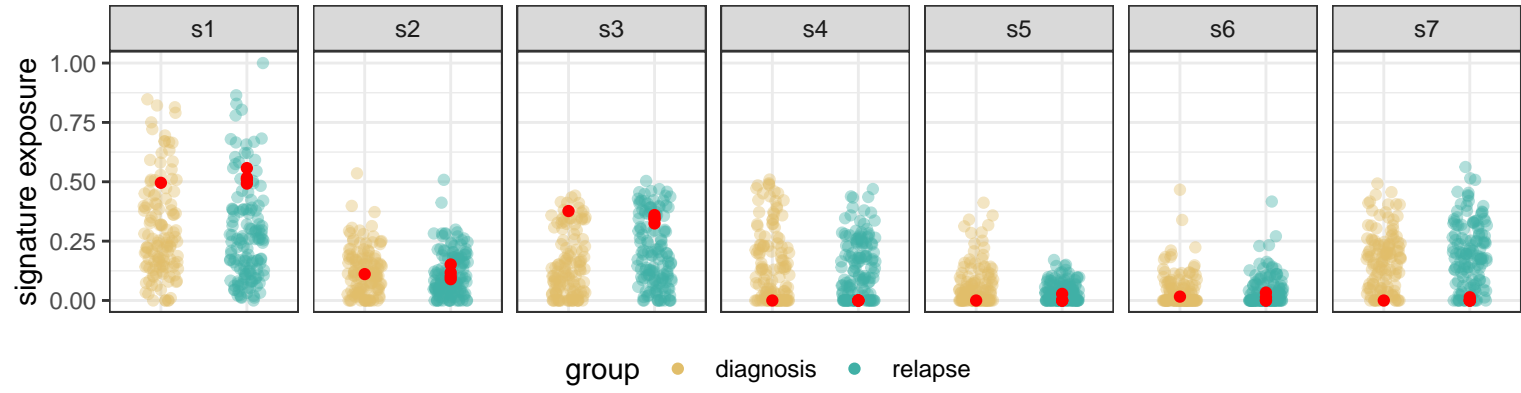

# BRITROC-229

stage: 3C  
platinum status: resistant  
prior lines: 1

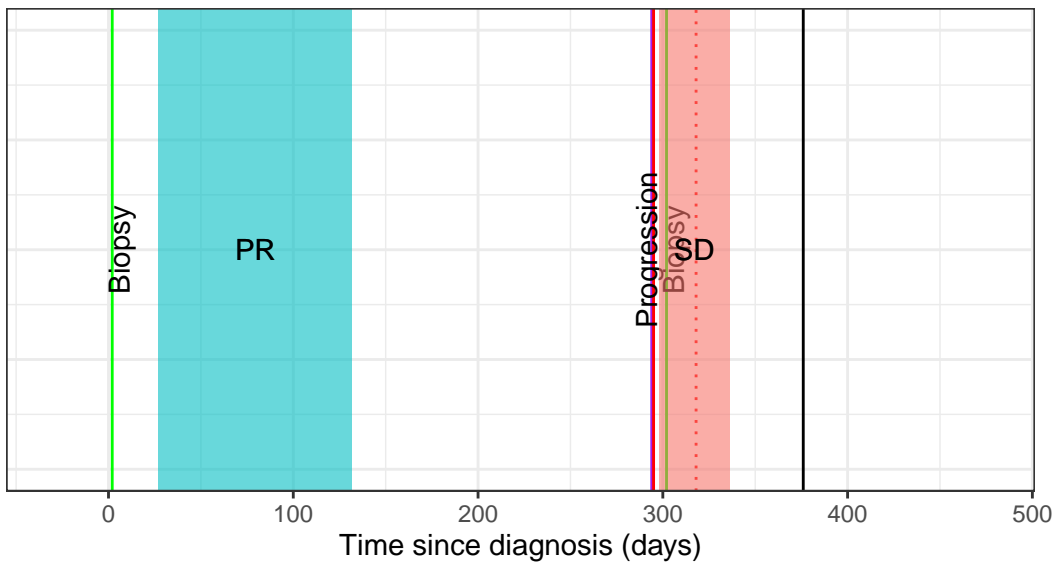

drug ■ Carboplatin ■ Avelumab

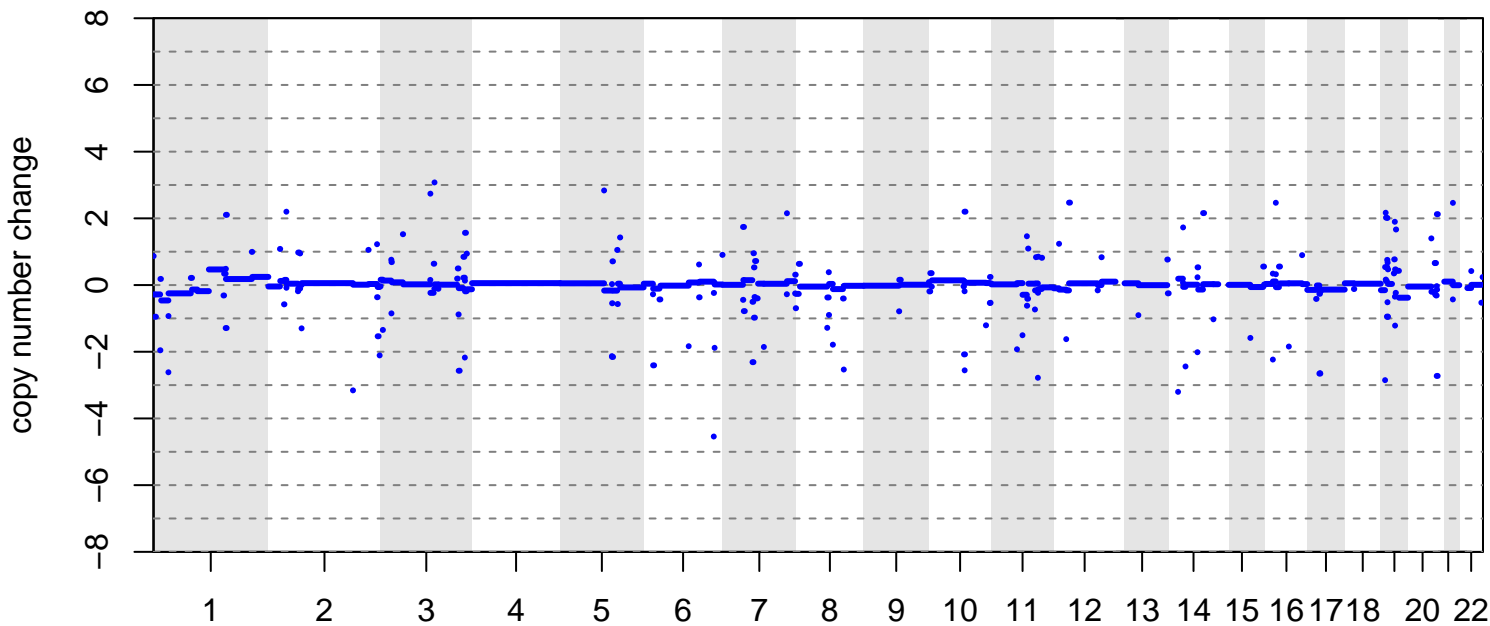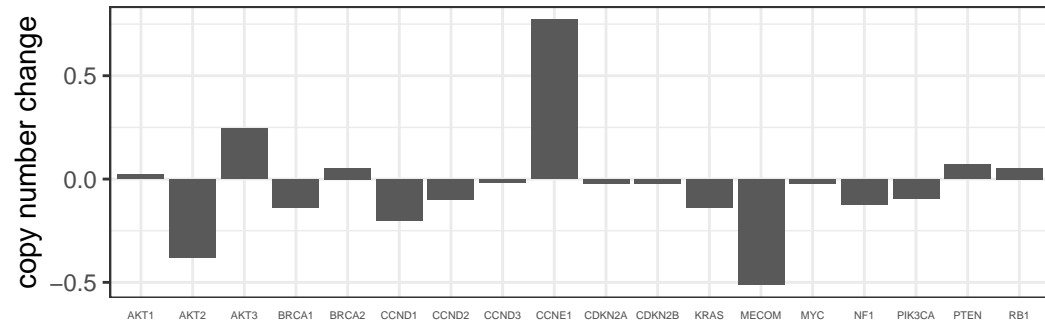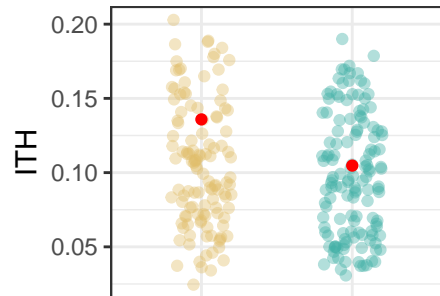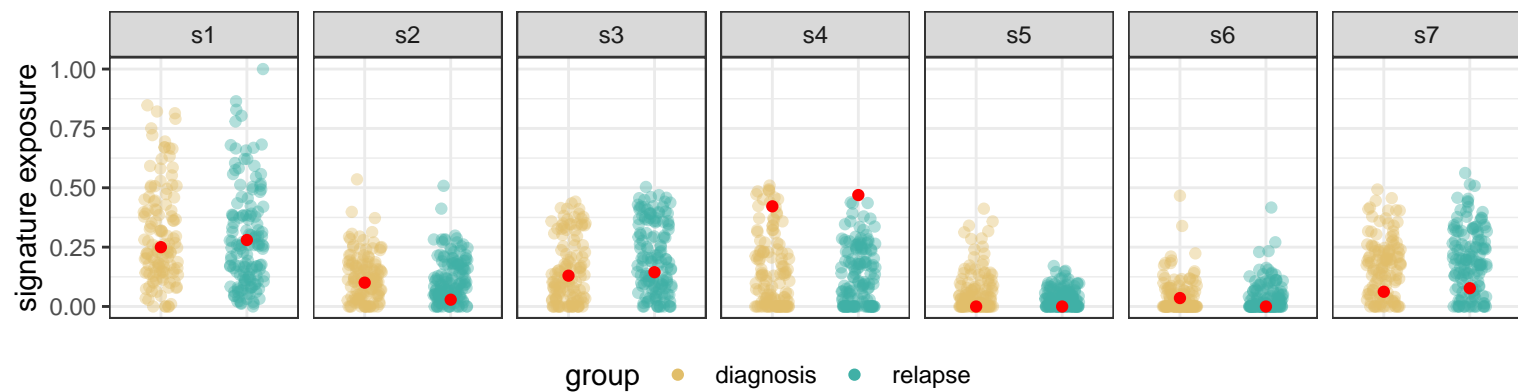

# BRITROC-23

stage: 3C  
platinum status: sensitive  
prior lines: 2

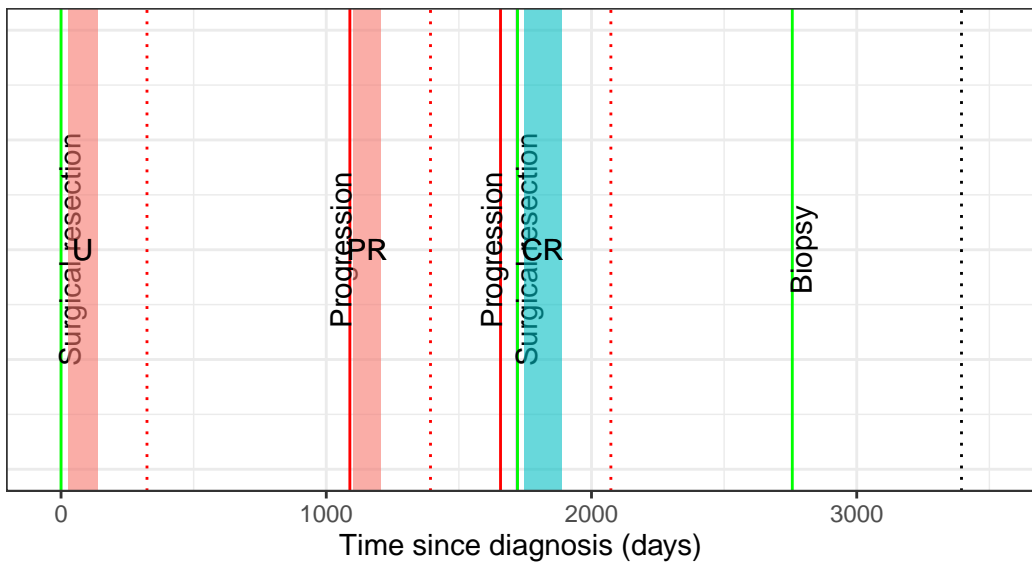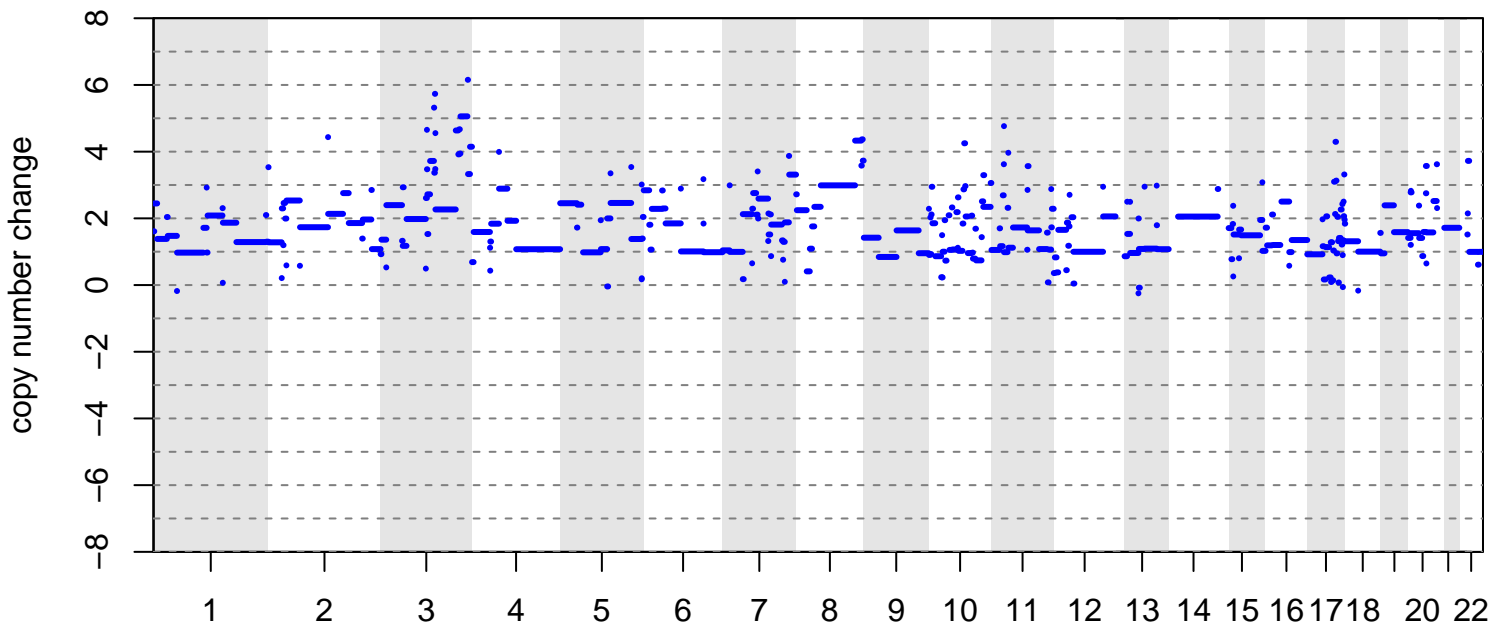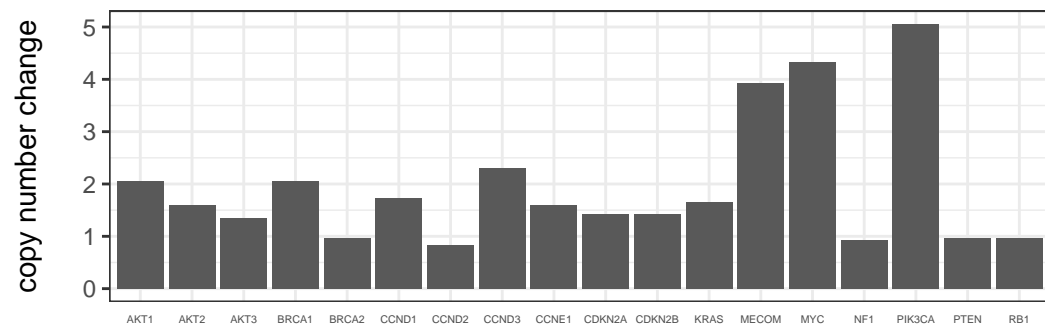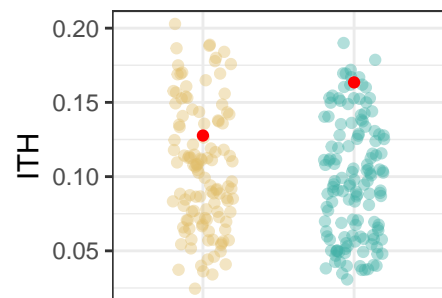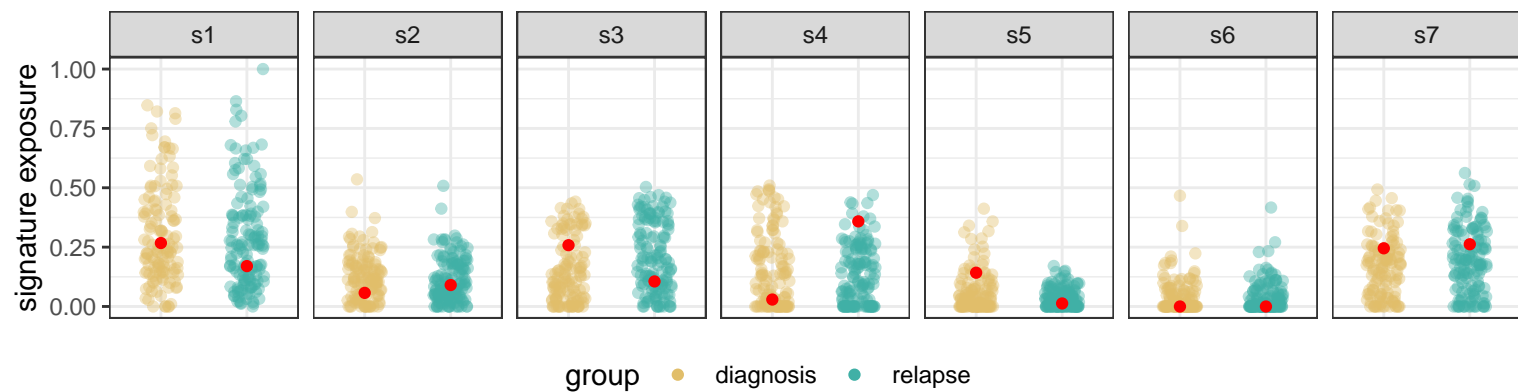

BRITROC-232

stage: 2B  
 platinum status: sensitive  
 prior lines: 1

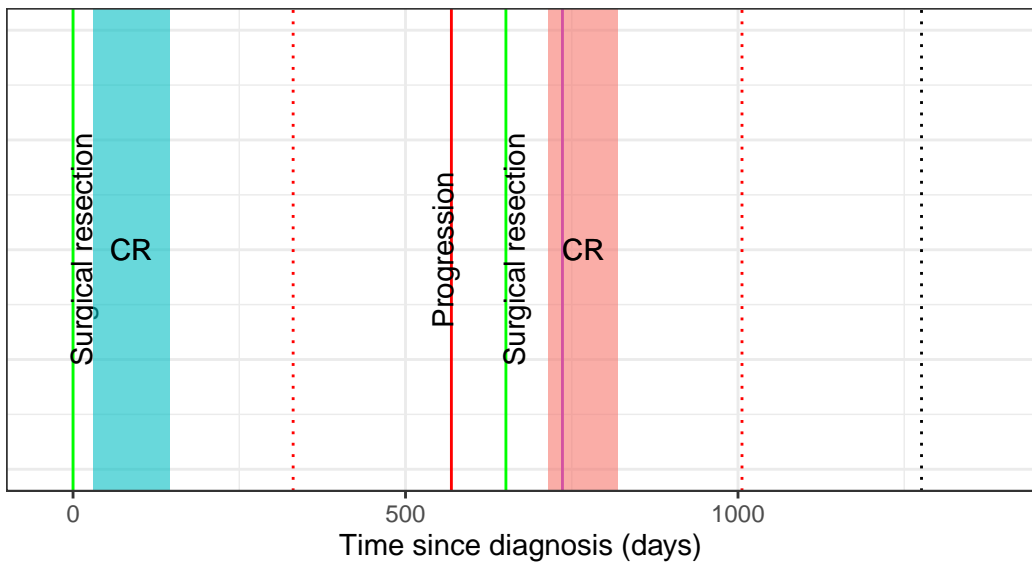

drug ■ Carboplatin + Paclitaxel ■ Carboplatin

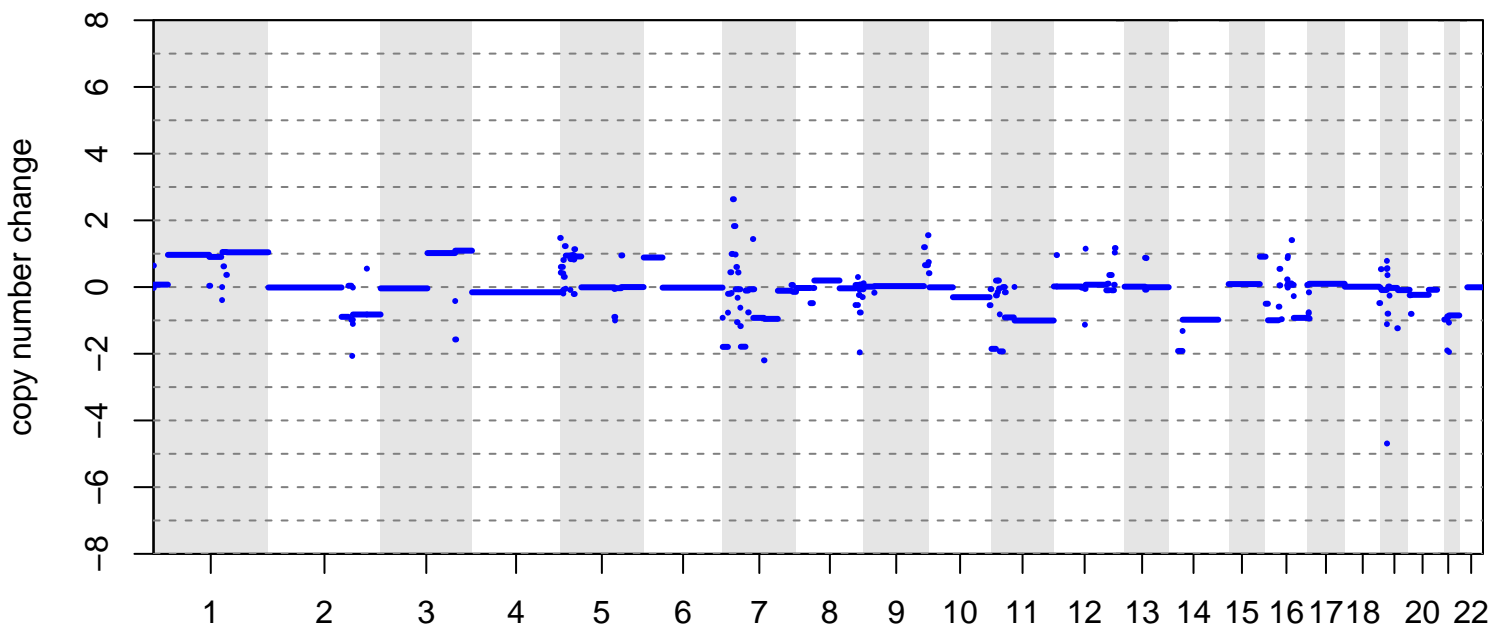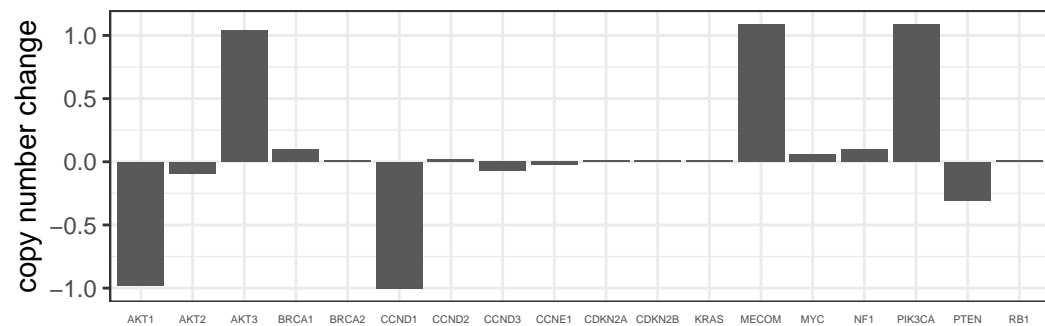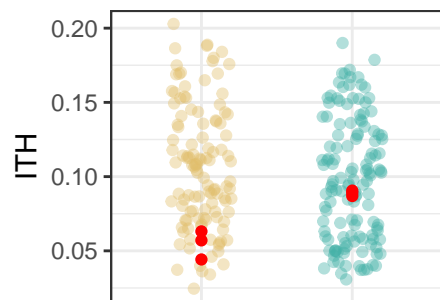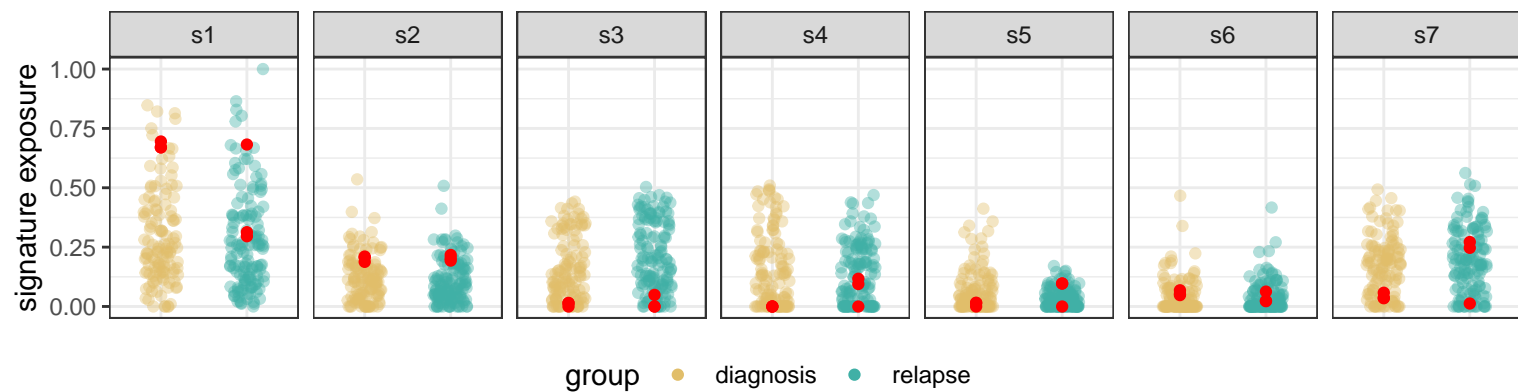

BRITROC-234

stage: 4NA  
 platinum status: resistant  
 prior lines: 1

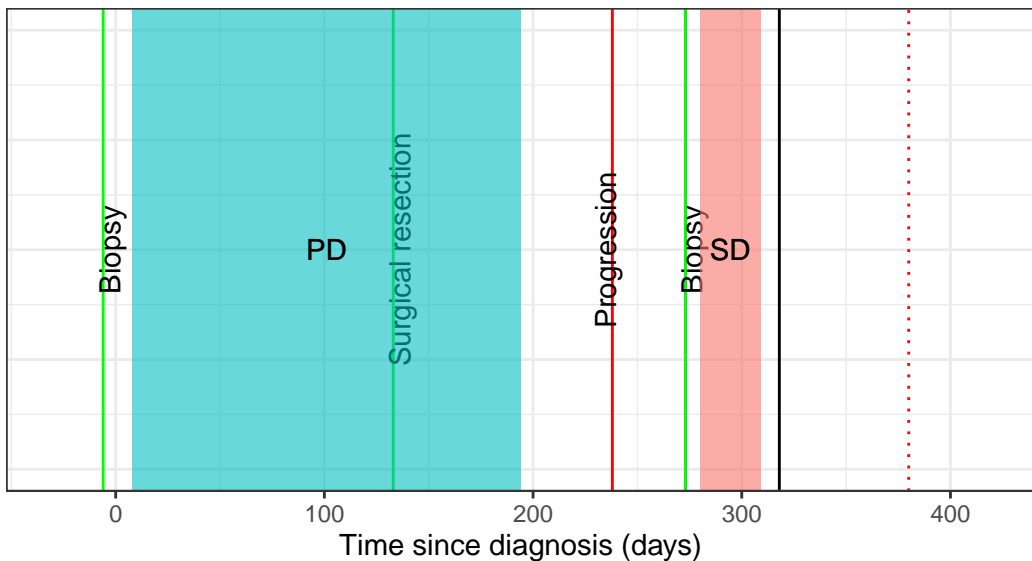

drug ■ Bevacizumab + Carboplatin + Paclitaxel ■ AZD2014/Placebo + Paclitaxel

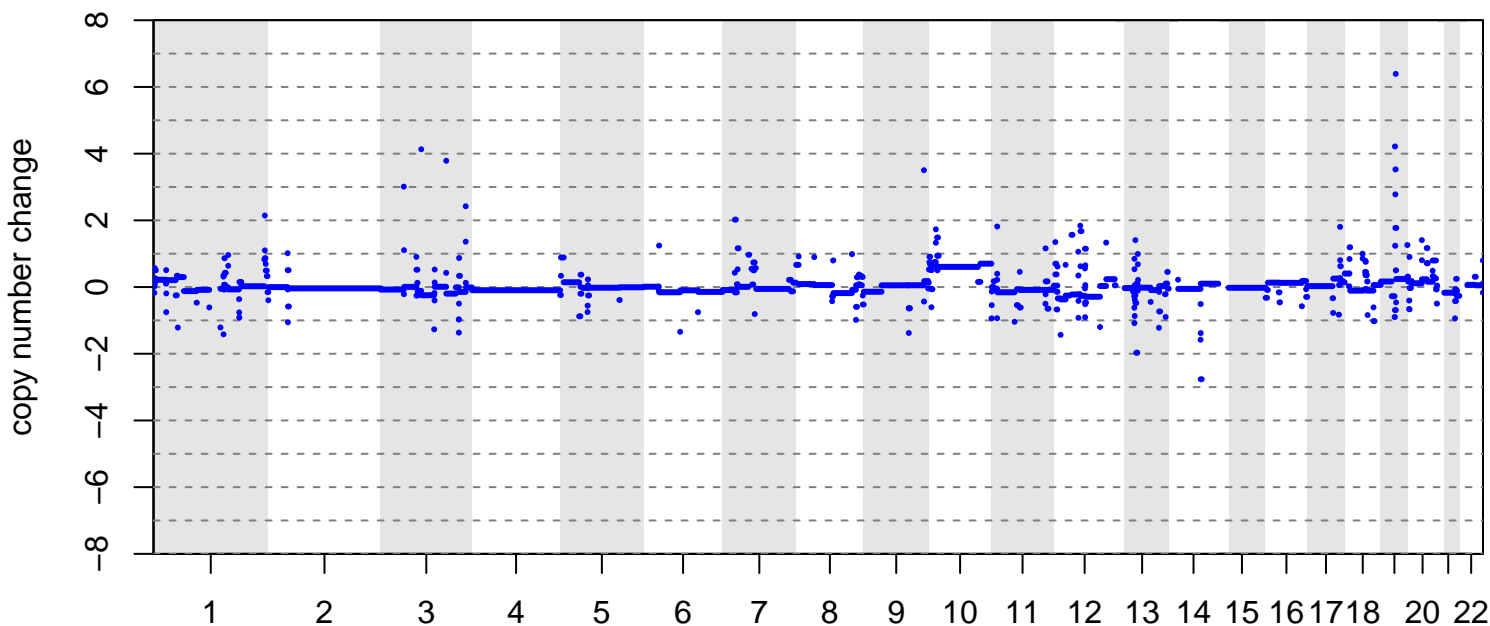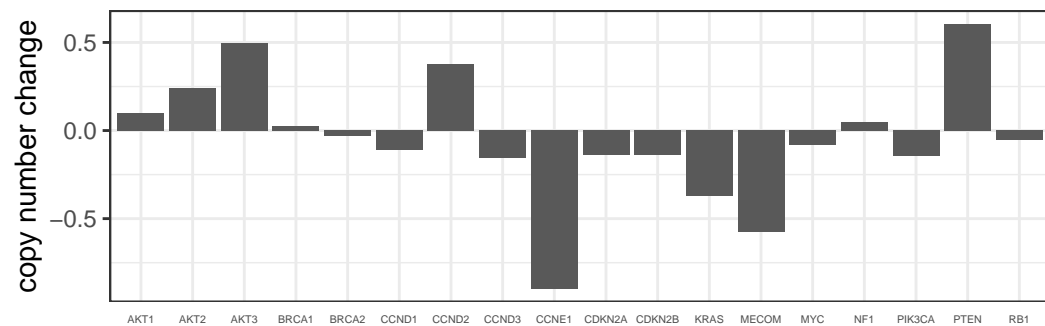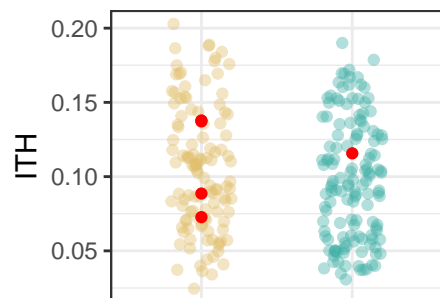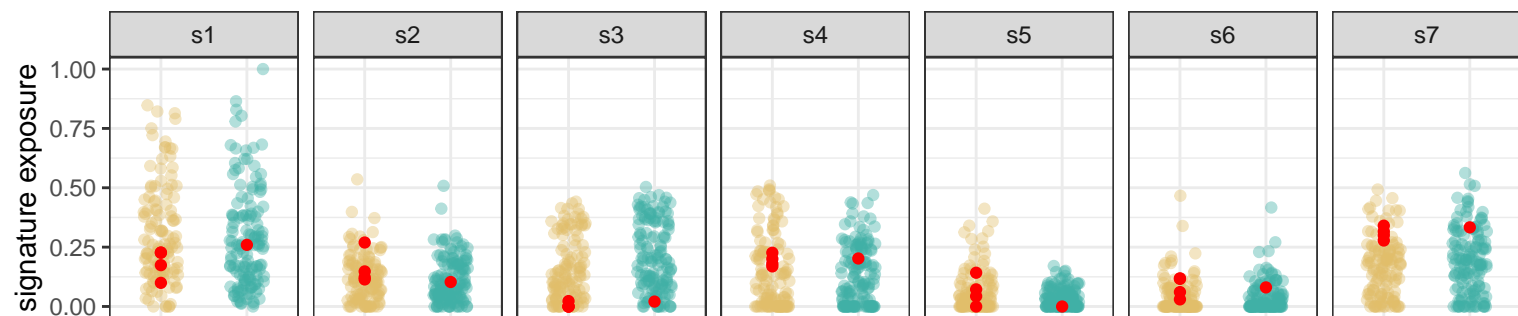

group ● diagnosis ● relapse

BRITROC-241

stage: 4NA  
 platinum status: sensitive  
 prior lines: 3

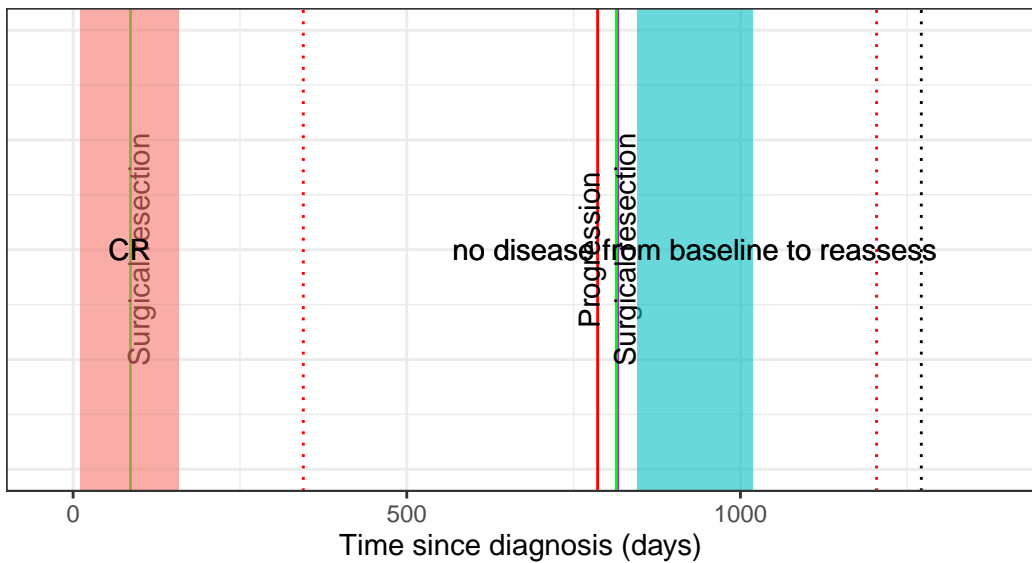

drug Carboplatin + Paclitaxel Carboplatin + PLD

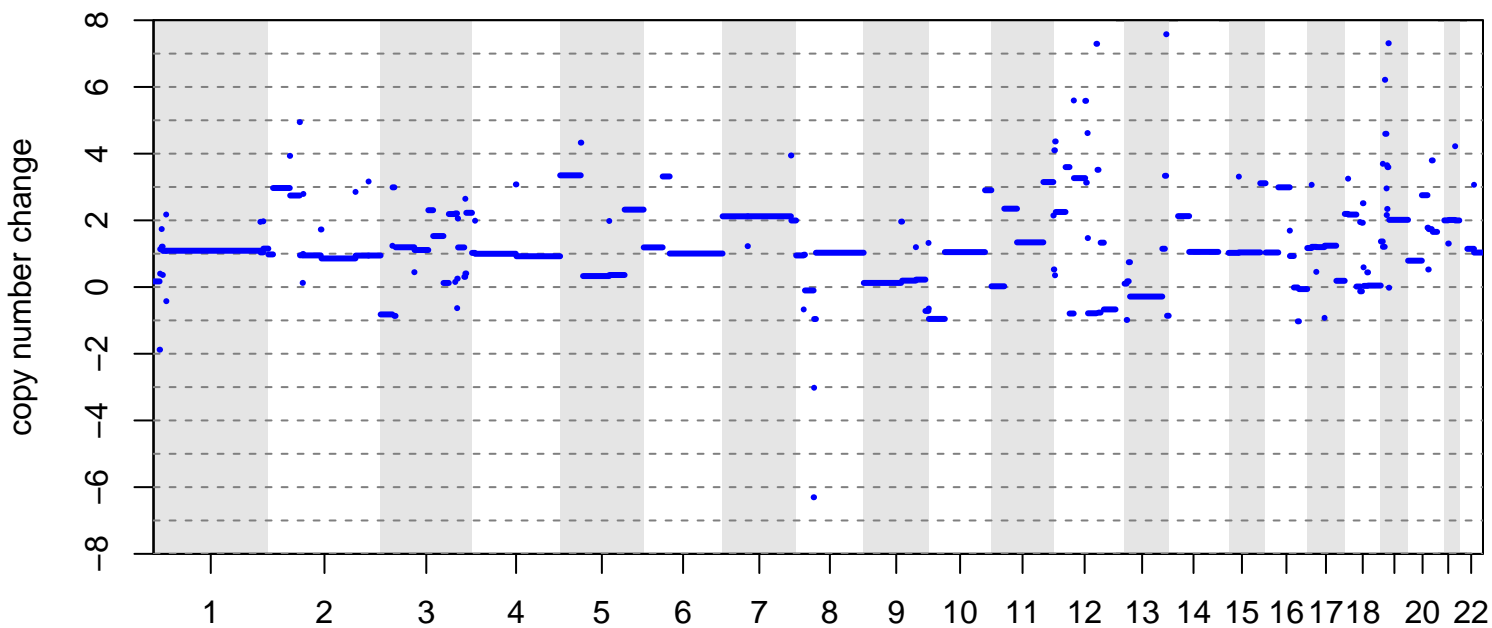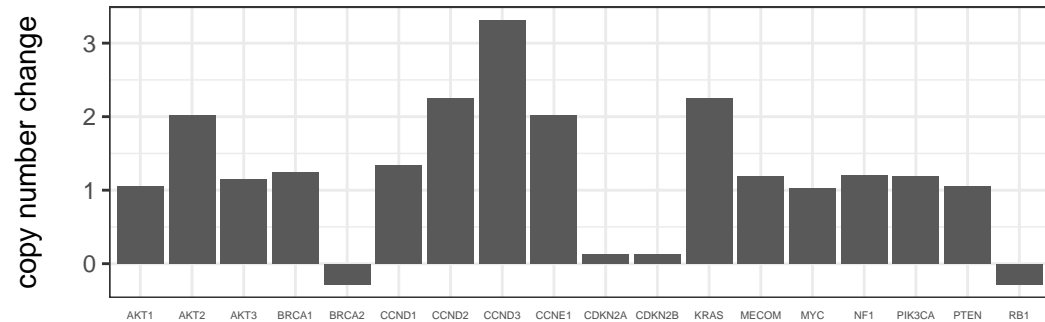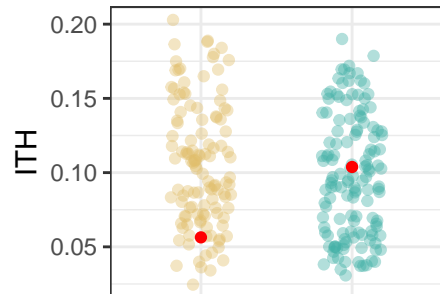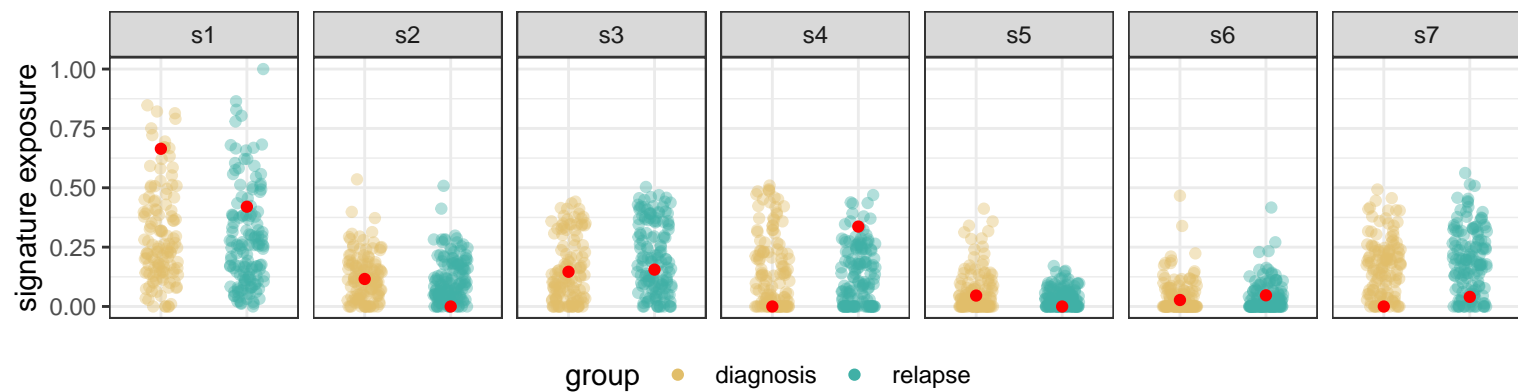

group diagnosis relapse

# BRITROC-242

stage: 3C  
platinum status: sensitive  
prior lines: 1

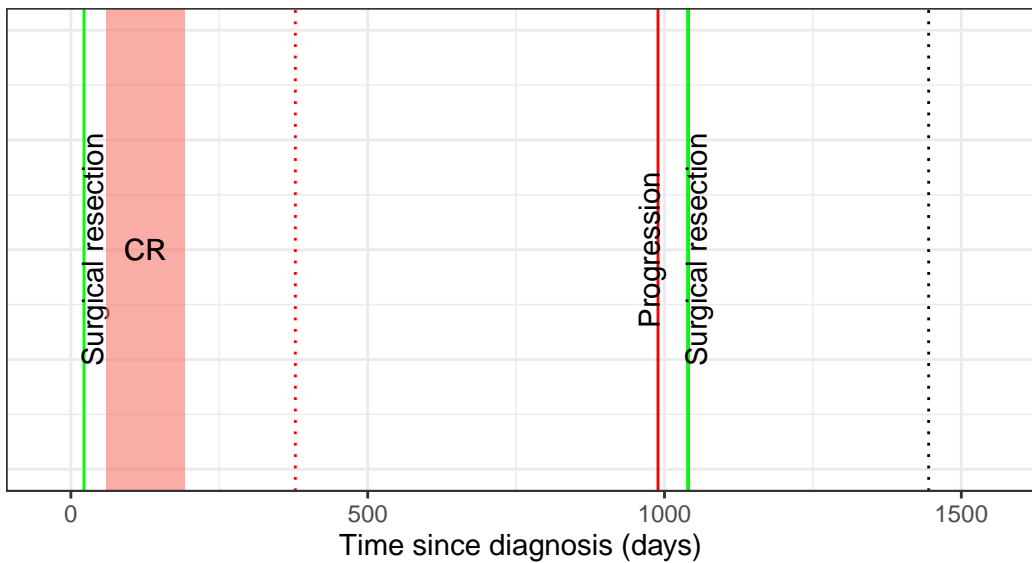

drug  Carboplatin + Paclitaxel

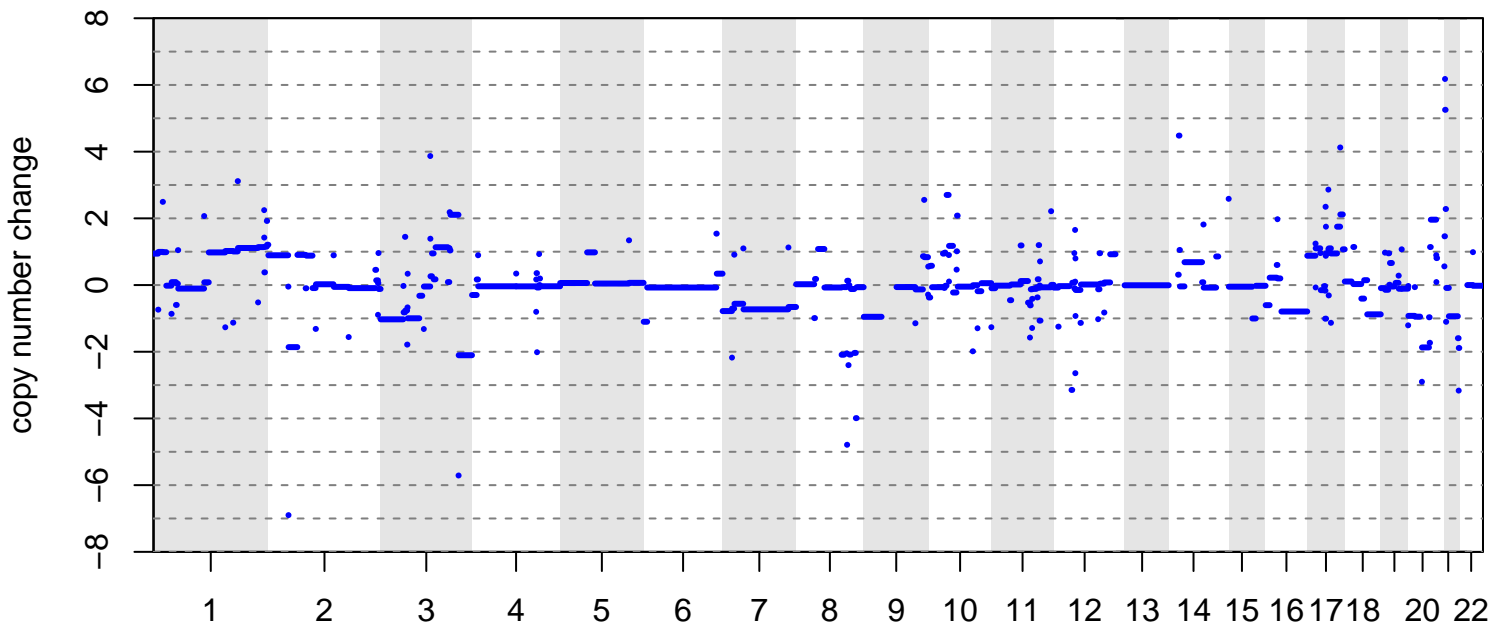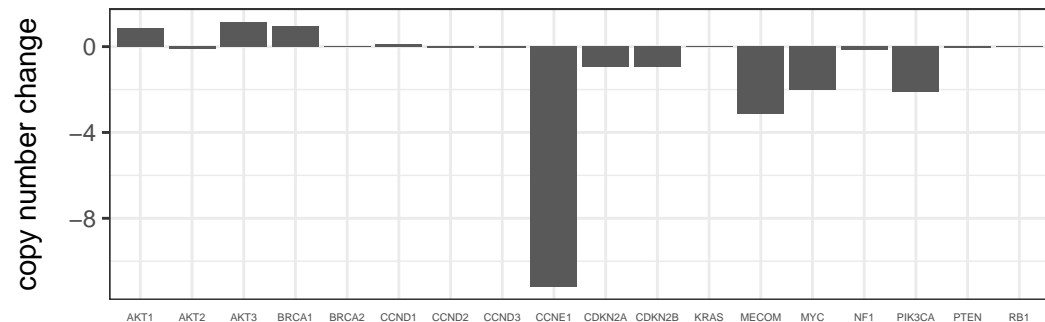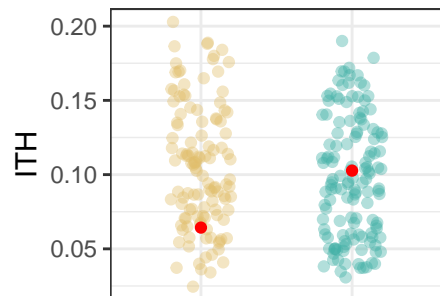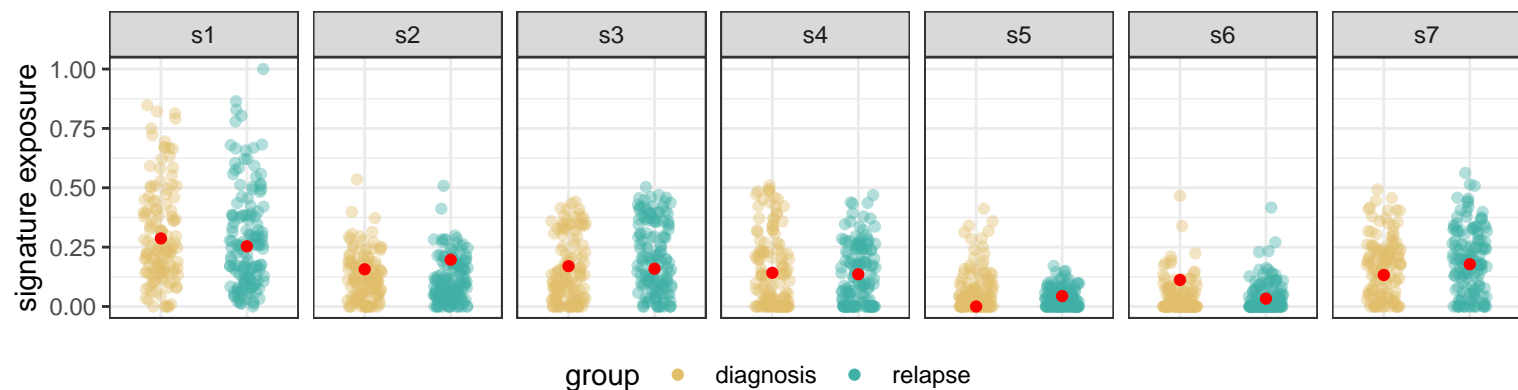

BRITROC-246

stage: 3C  
 platinum status: sensitive  
 prior lines: 1

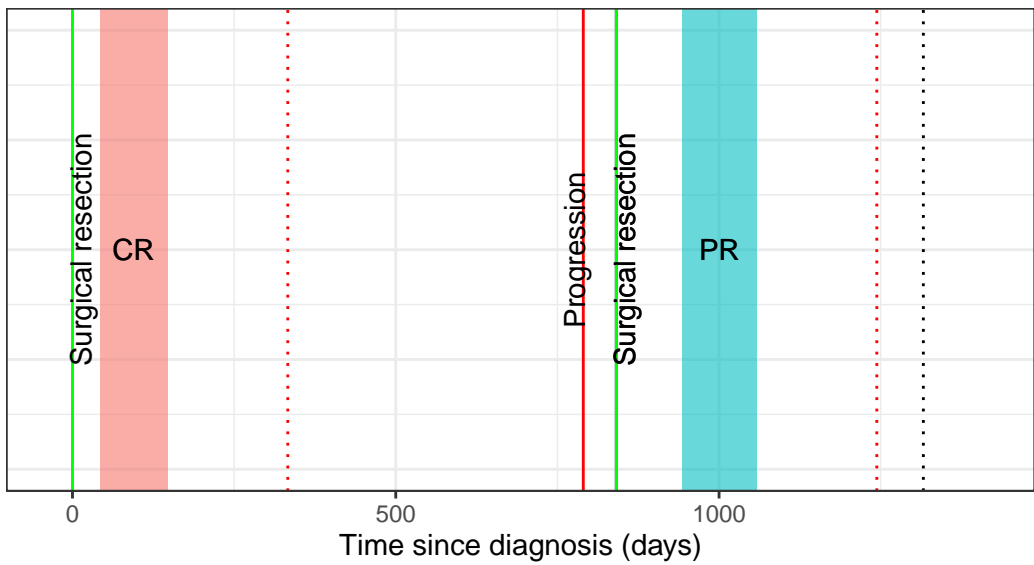

drug ■ Carboplatin + Paclitaxel ■ Carboplatin + PLD

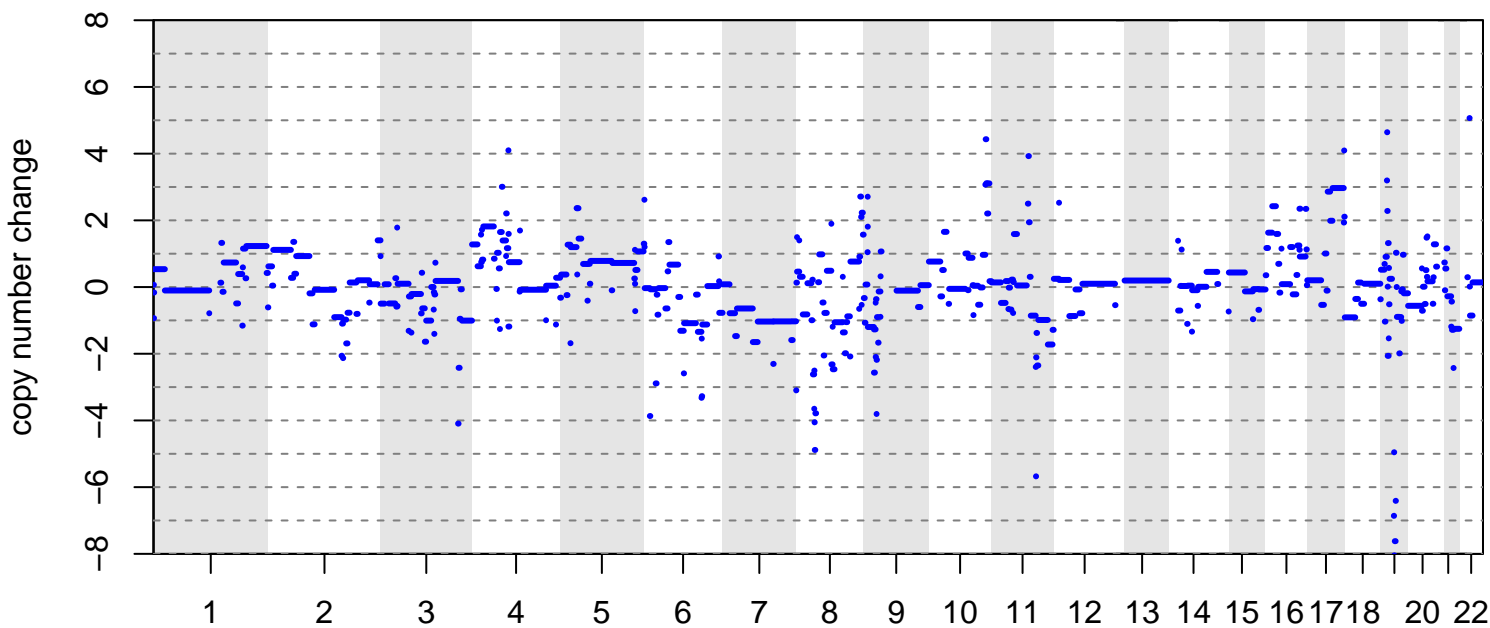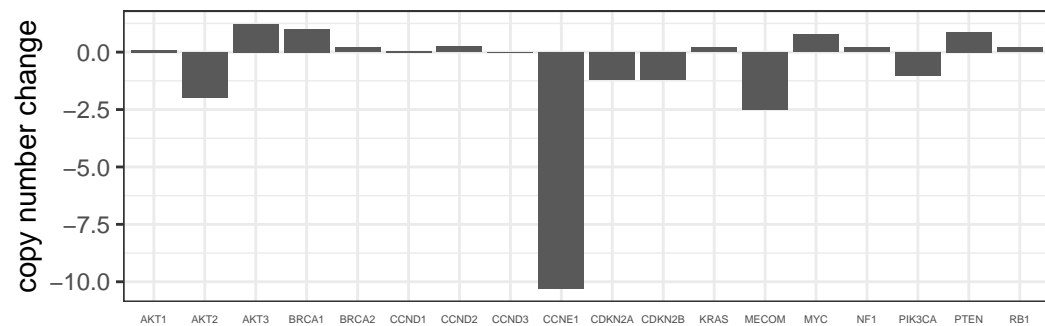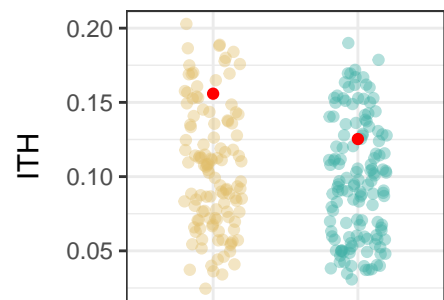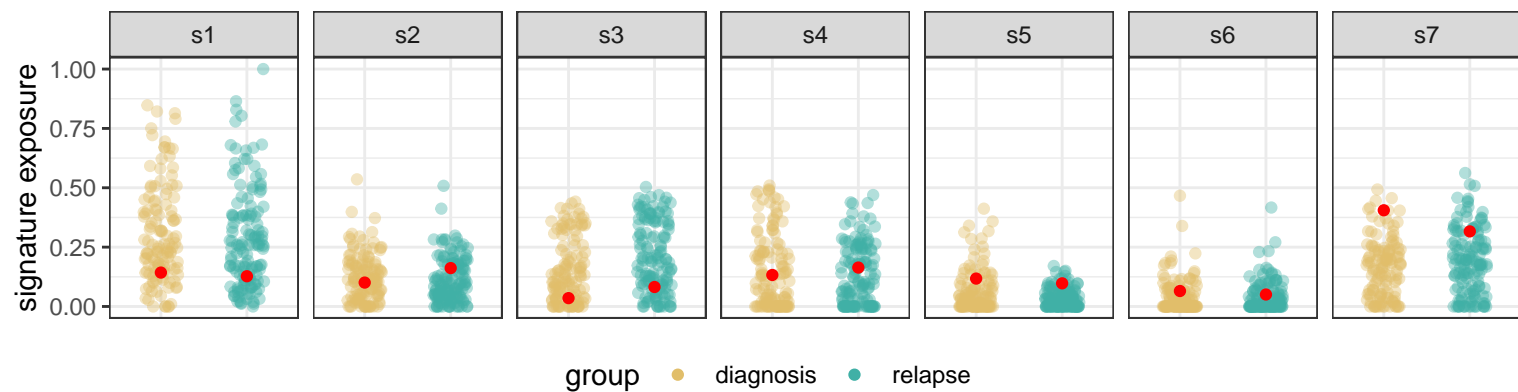

group ● diagnosis ● relapse



# BRITROC-248

stage: 4NA  
platinum status: resistant  
prior lines: 2

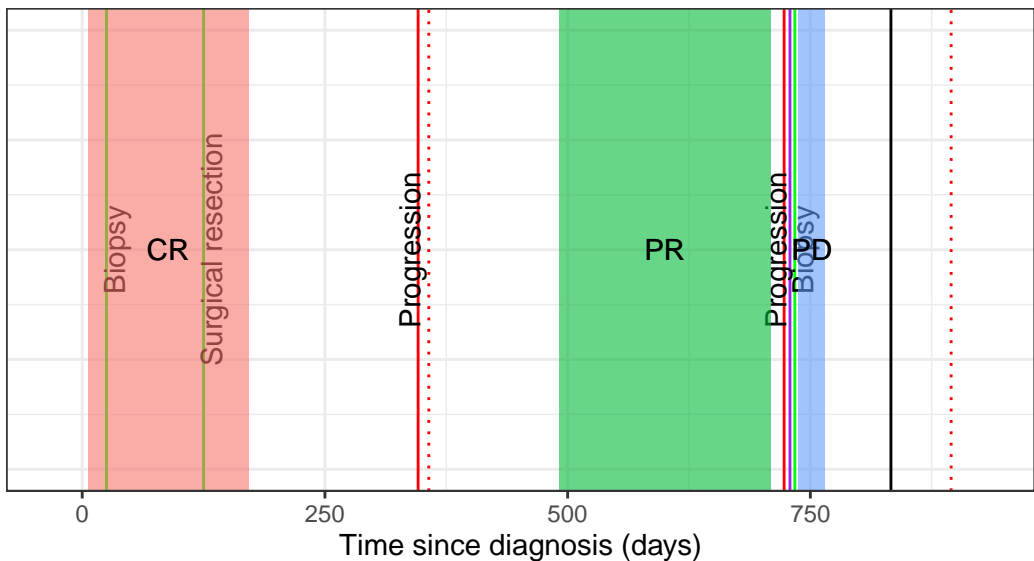

drug ■ Carboplatin + Paclitaxel ■ Carboplatin + PLD + Olaparib ■ Paclitaxel

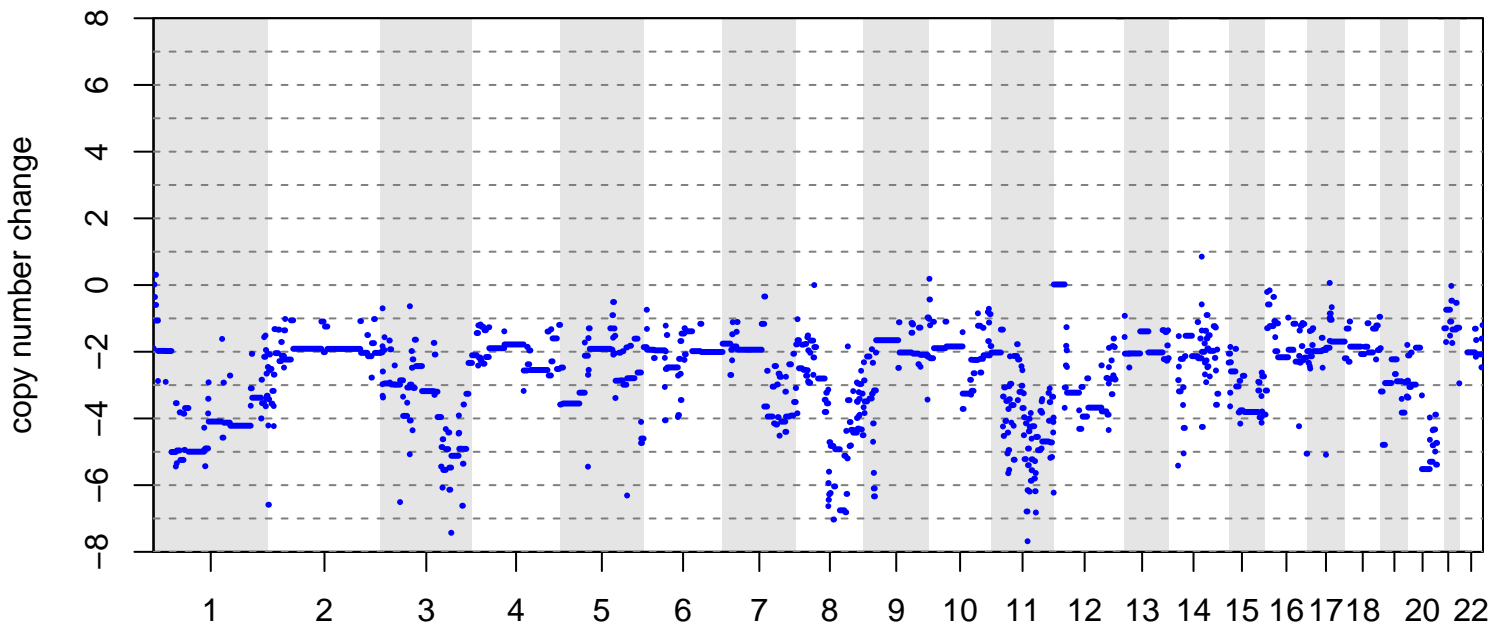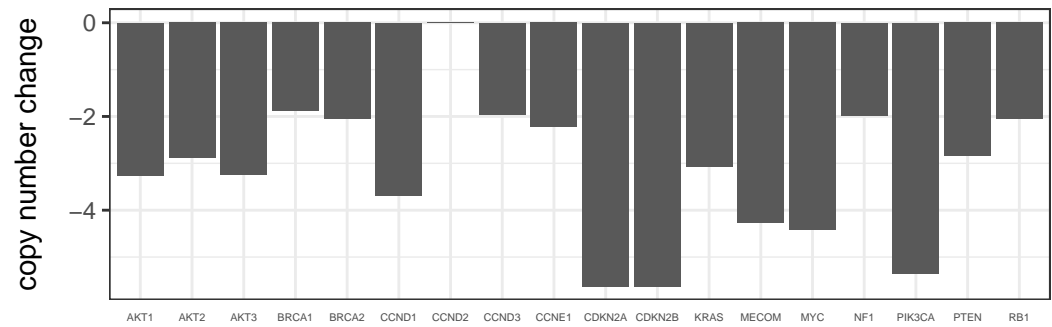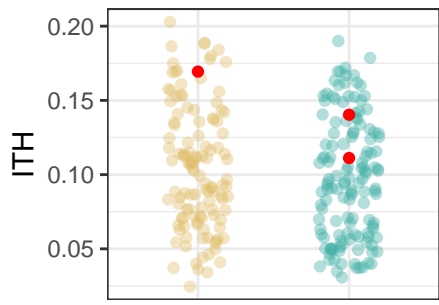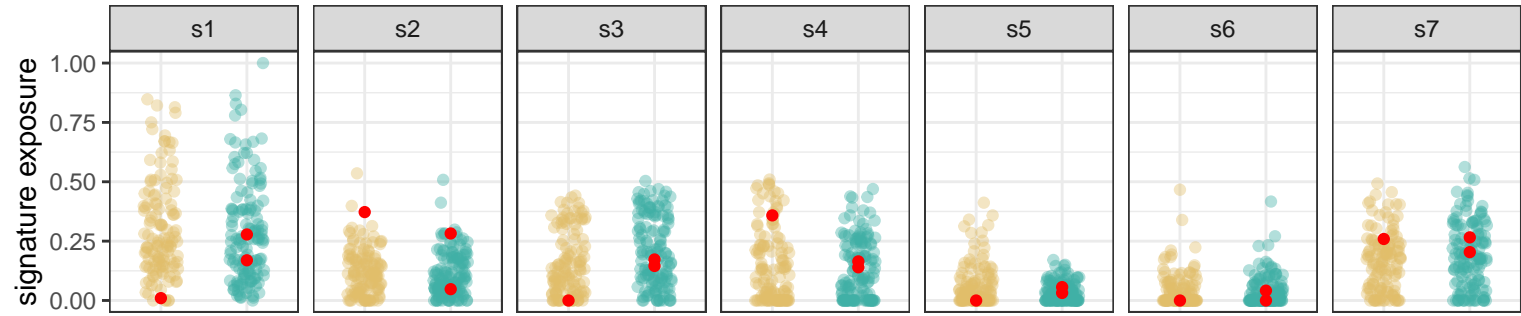

group ● diagnosis ● relapse

BRITROC-256

stage: 3C  
 platinum status: sensitive  
 prior lines: 2

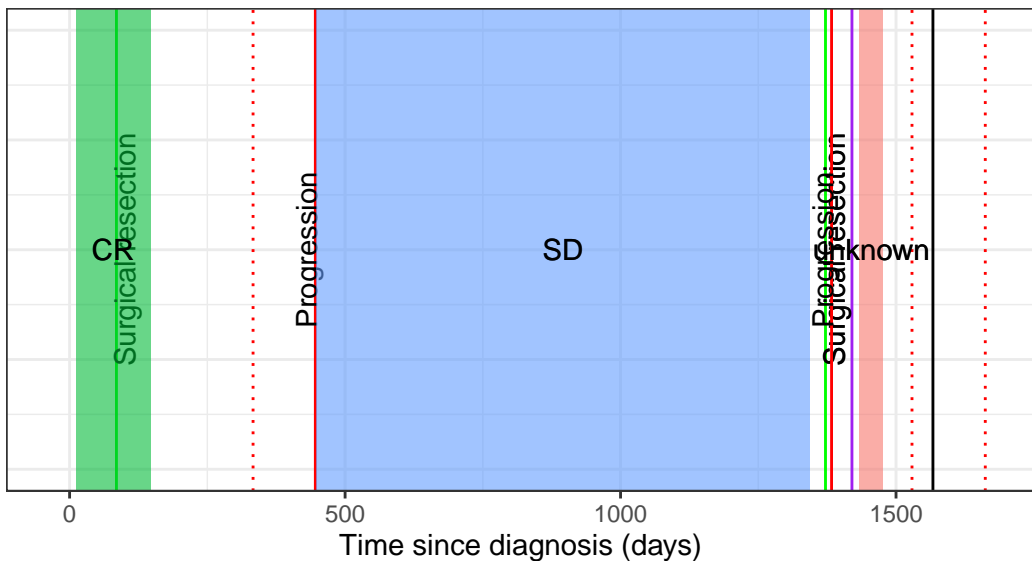

drug ■ Carboplatin + Paclitaxel ■ Carboplatin + PLD + Rucaparib/Placebo ■ Carboplatin

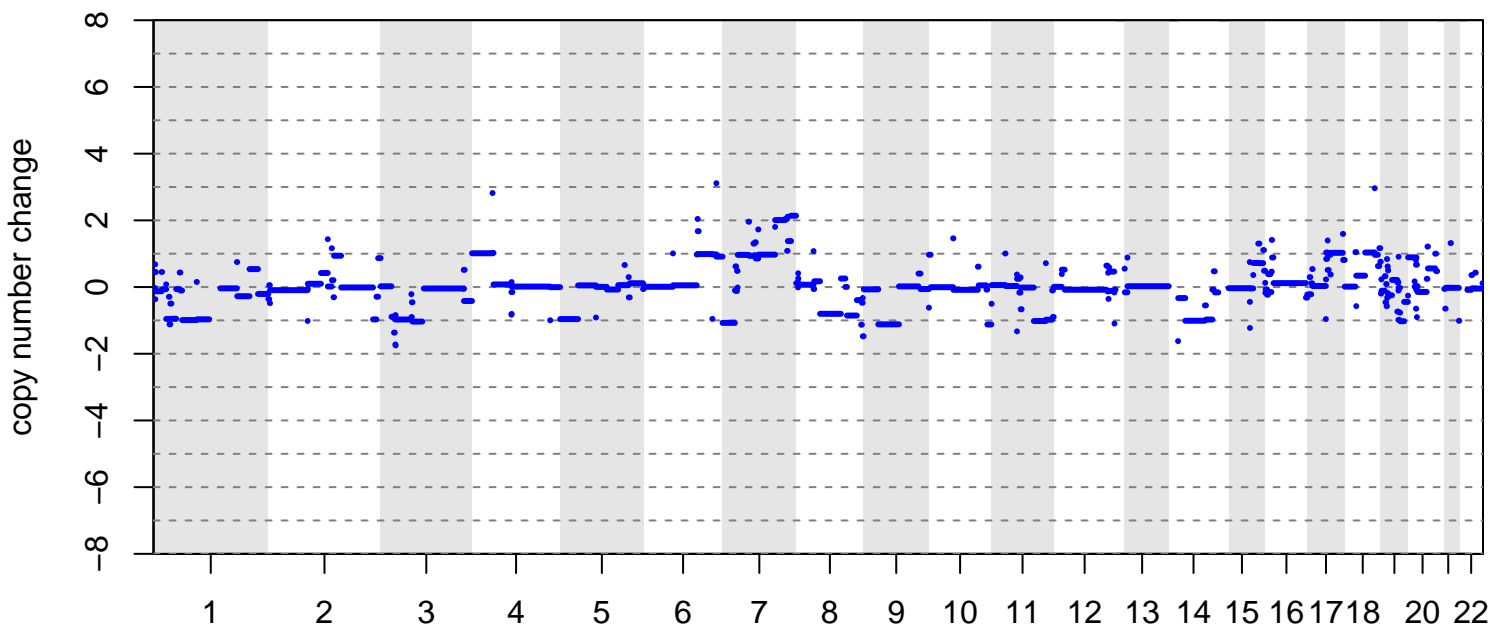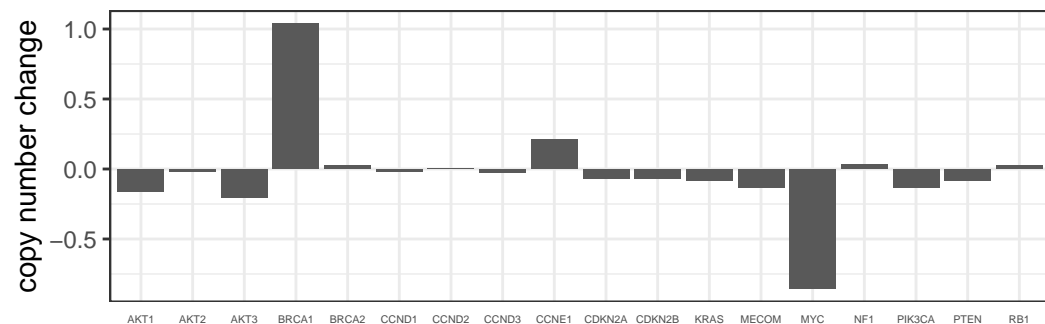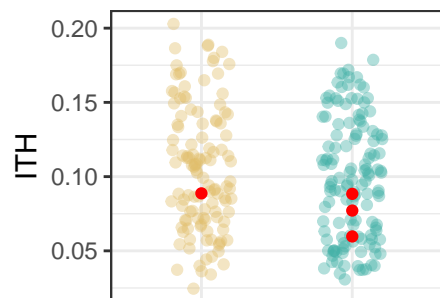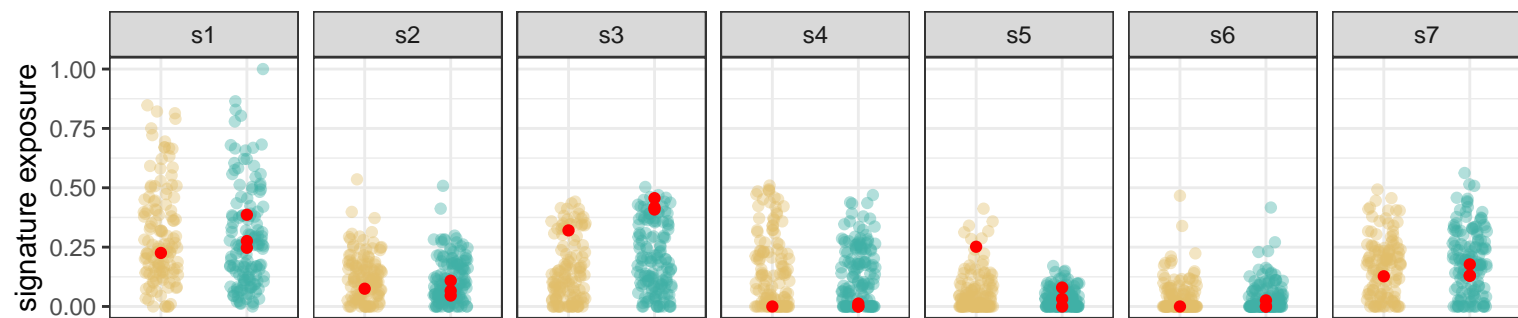

group ● diagnosis ● relapse

BRITROC-259

stage: 3A  
 platinum status: sensitive  
 prior lines: 2

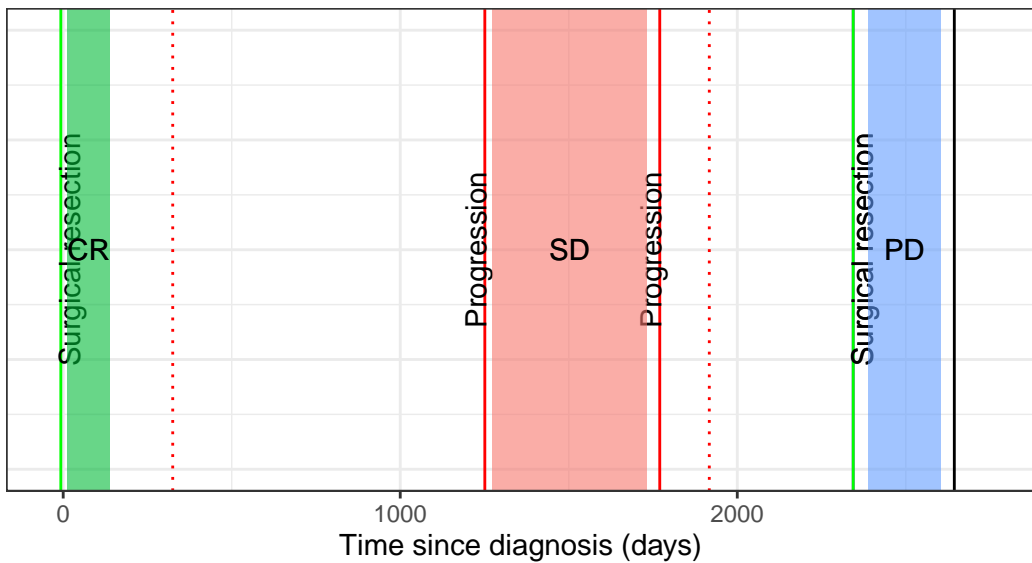

drug ■ Carboplatin + Paclitaxel ■ Bevacizumab + Carboplatin + Gemcitabine ■ Cisplatin + Paclitaxel

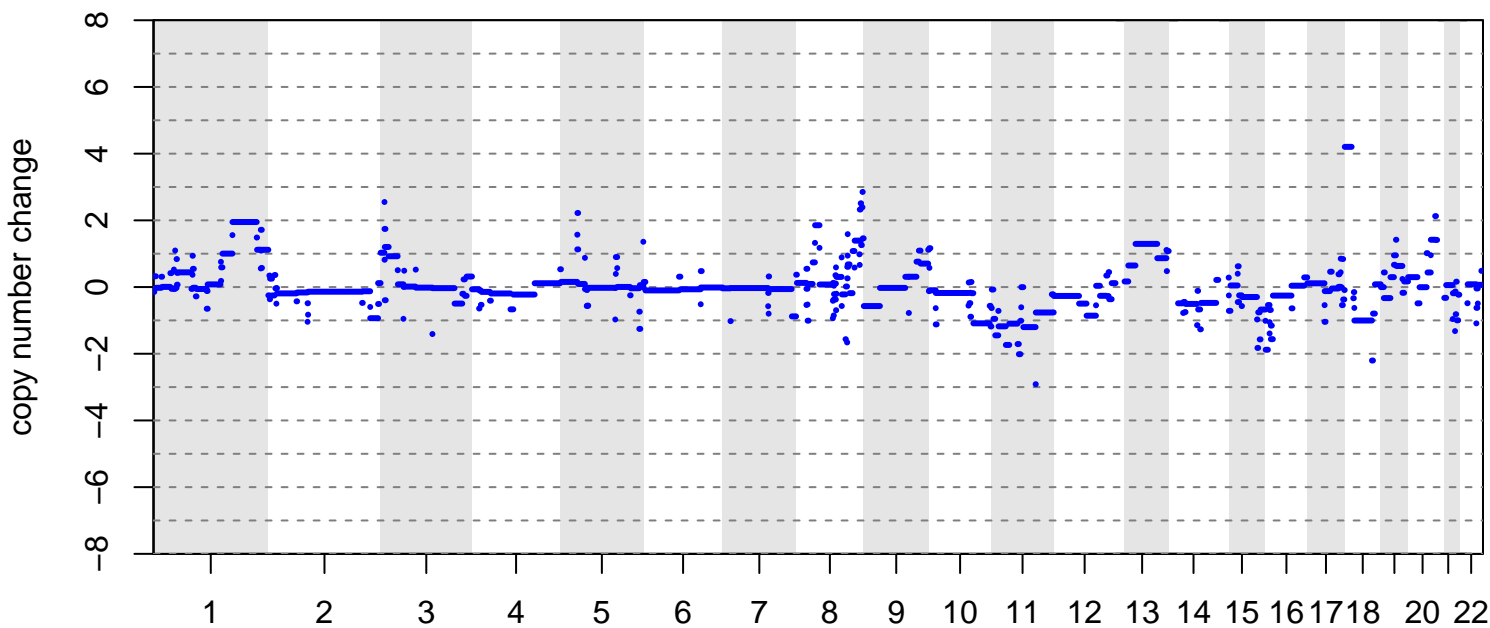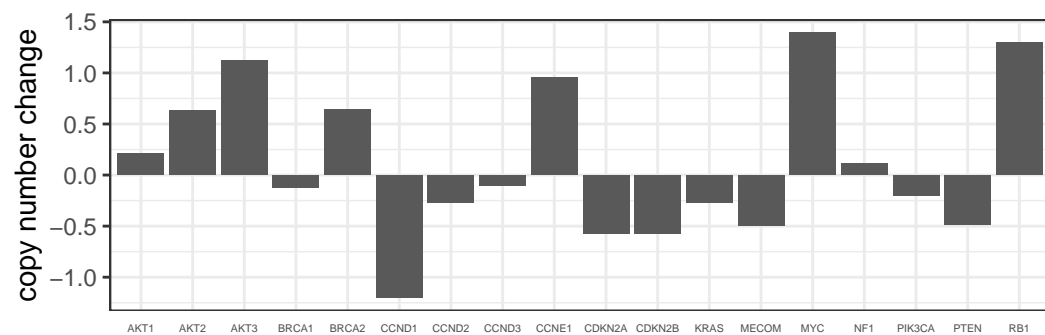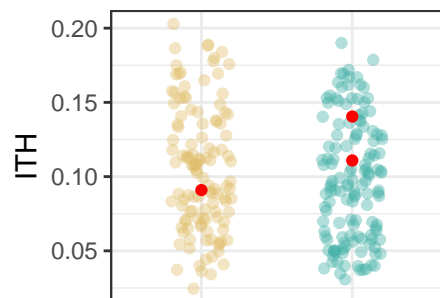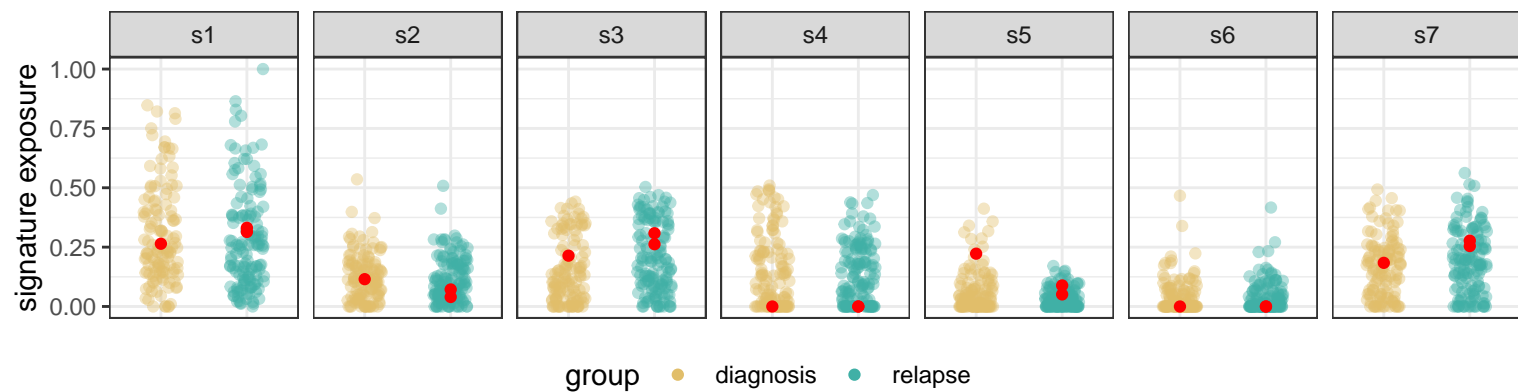

# BRITROC-260

stage: 2A

platinum status: sensitive

prior lines: 1

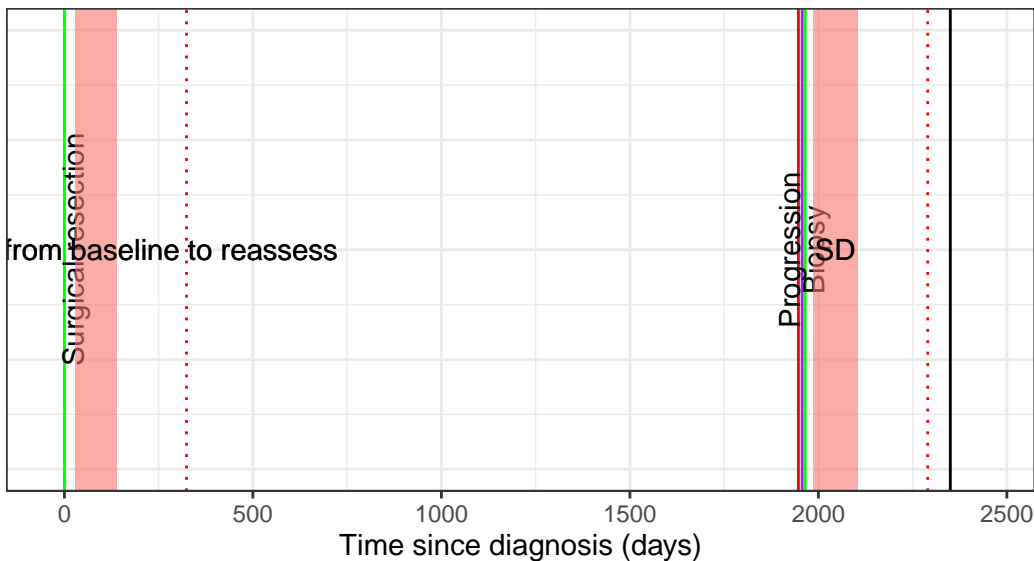

drug Carboplatin + Paclitaxel

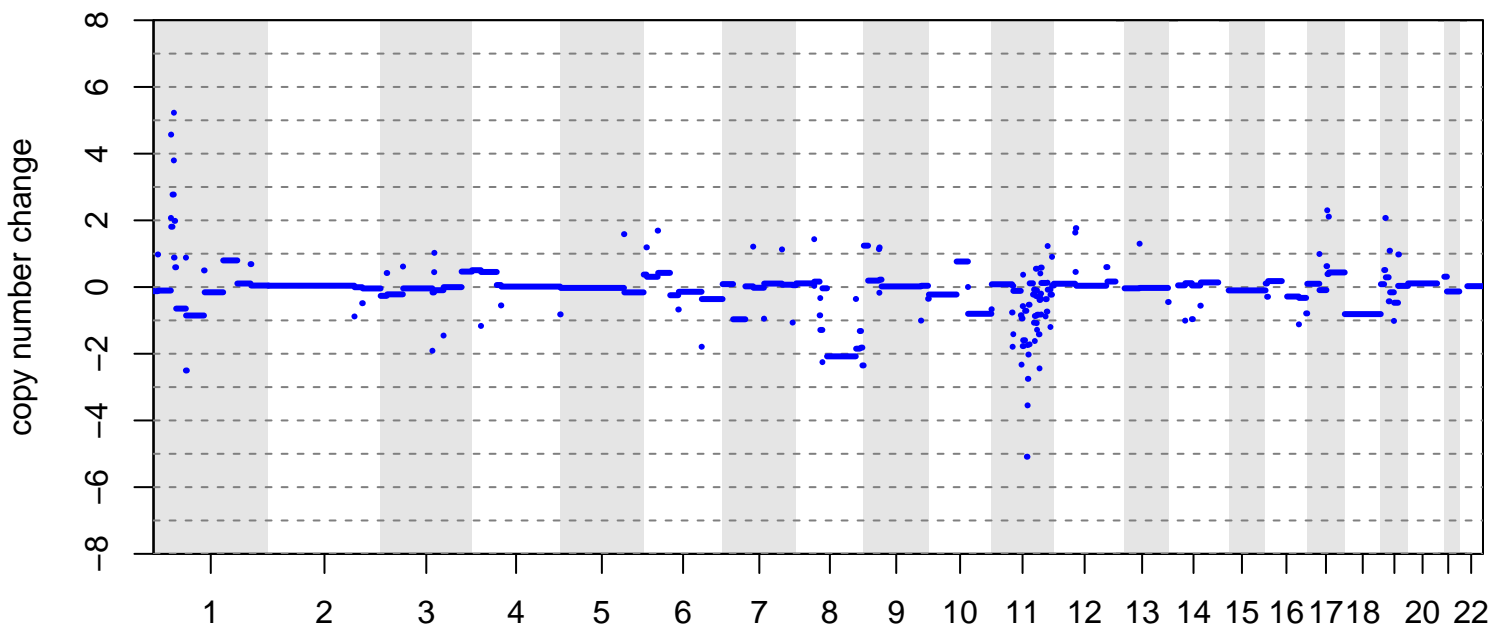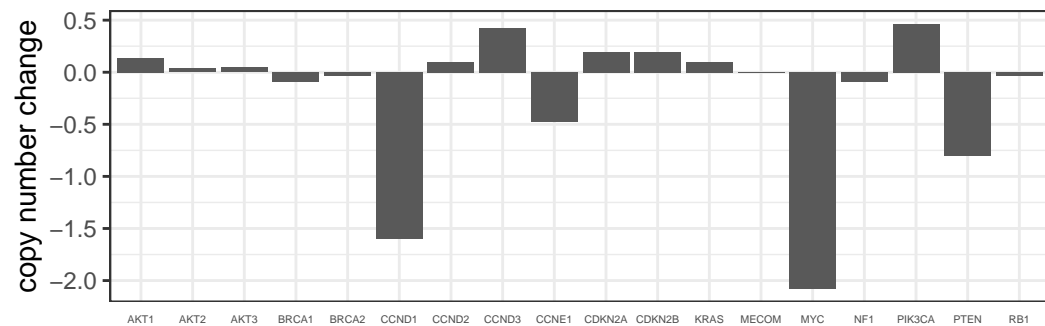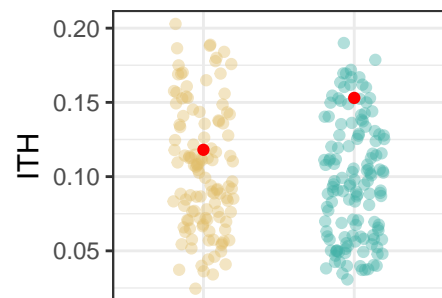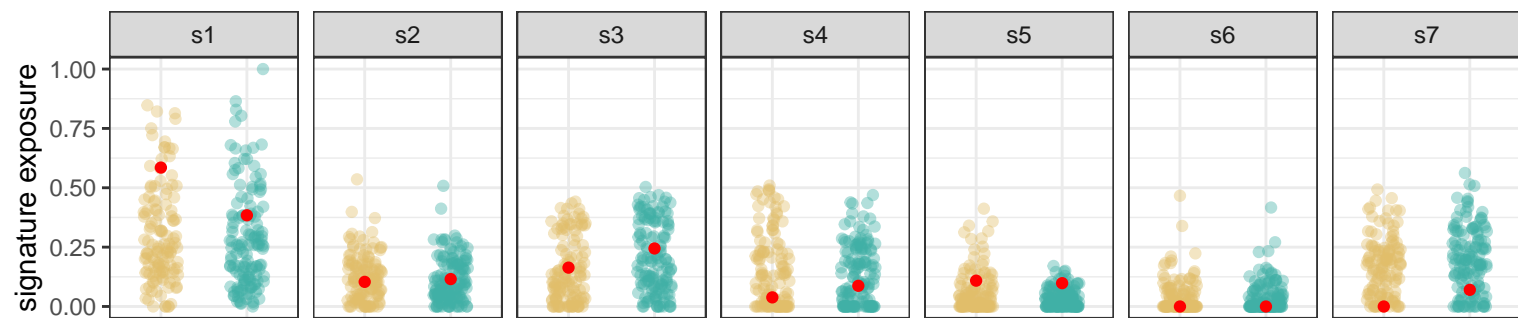

group diagnosis relapse

# BRITROC-267

stage: 3B  
platinum status: sensitive  
prior lines: 1

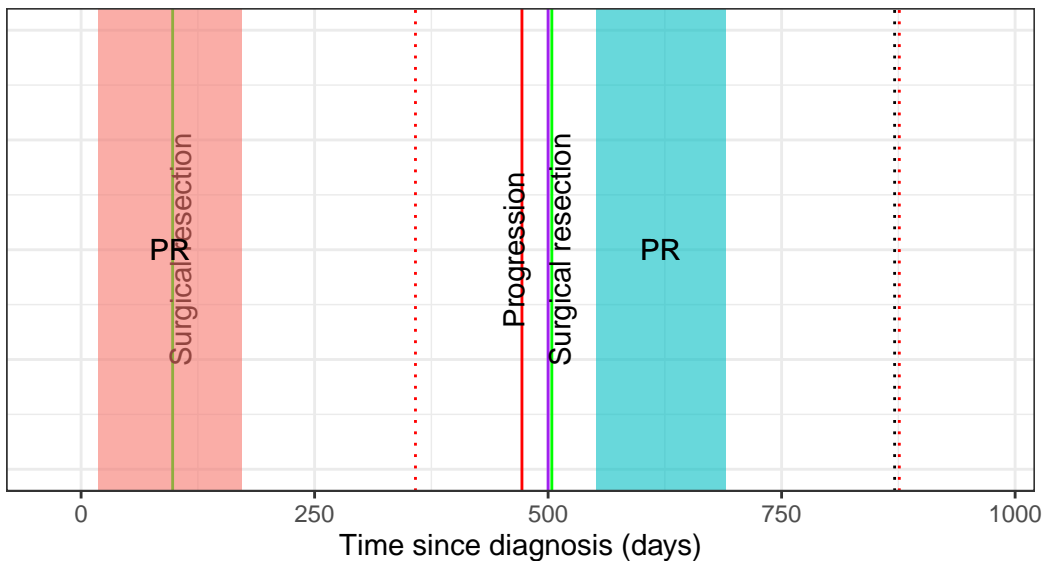

drug ■ Carboplatin + Paclitaxel ■ Carboplatin + PLD

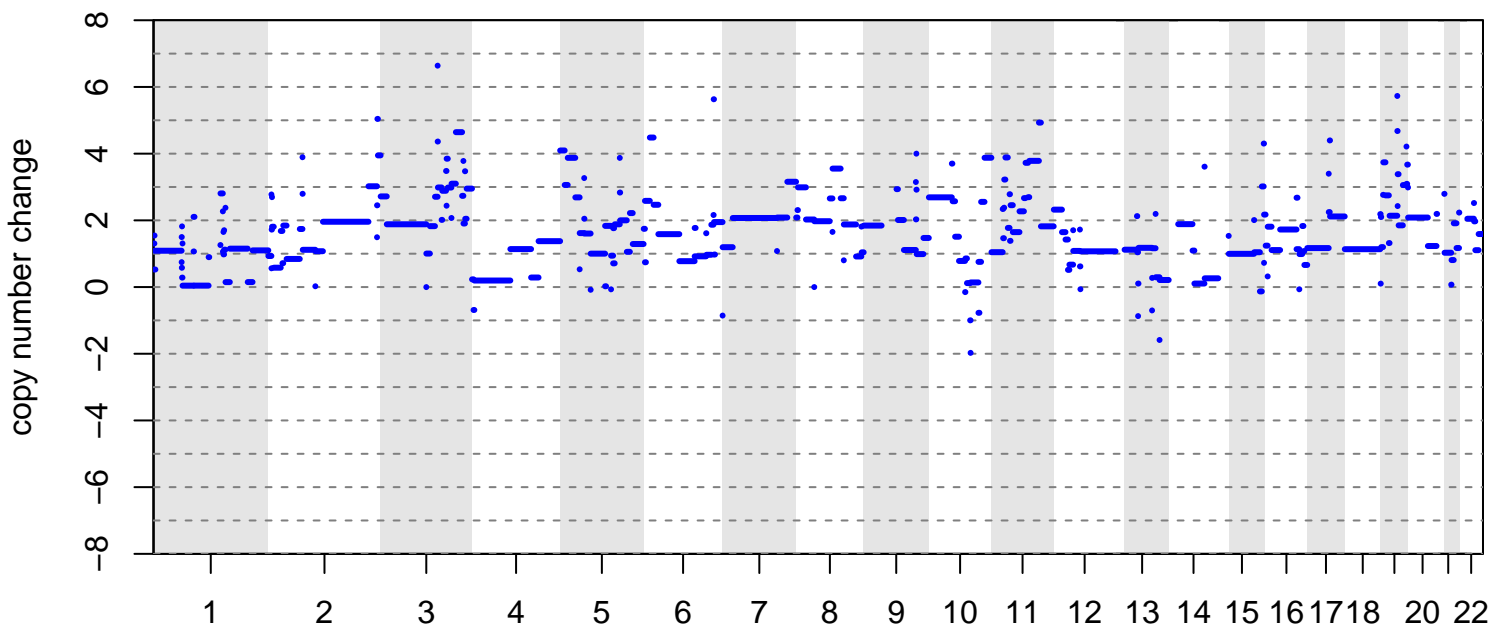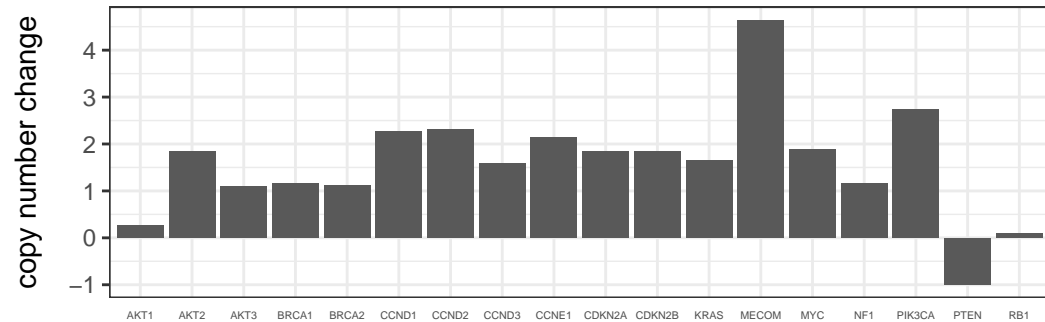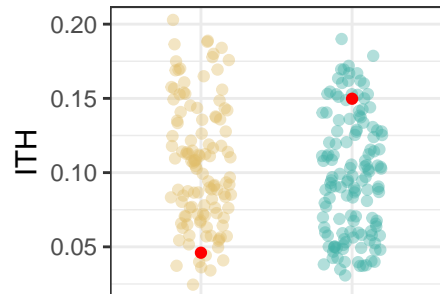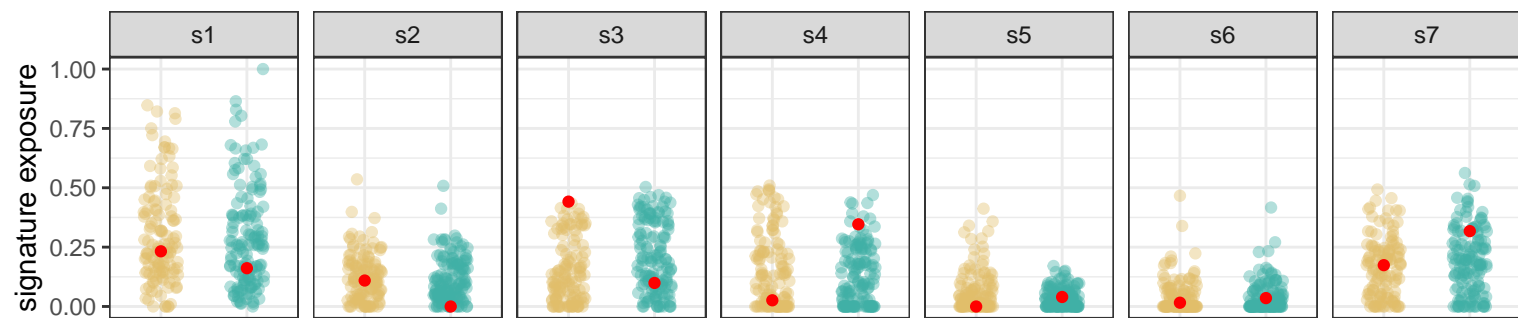

group ● diagnosis ● relapse

# BRITROC-268

stage: 3C  
platinum status: resistant  
prior lines: 2

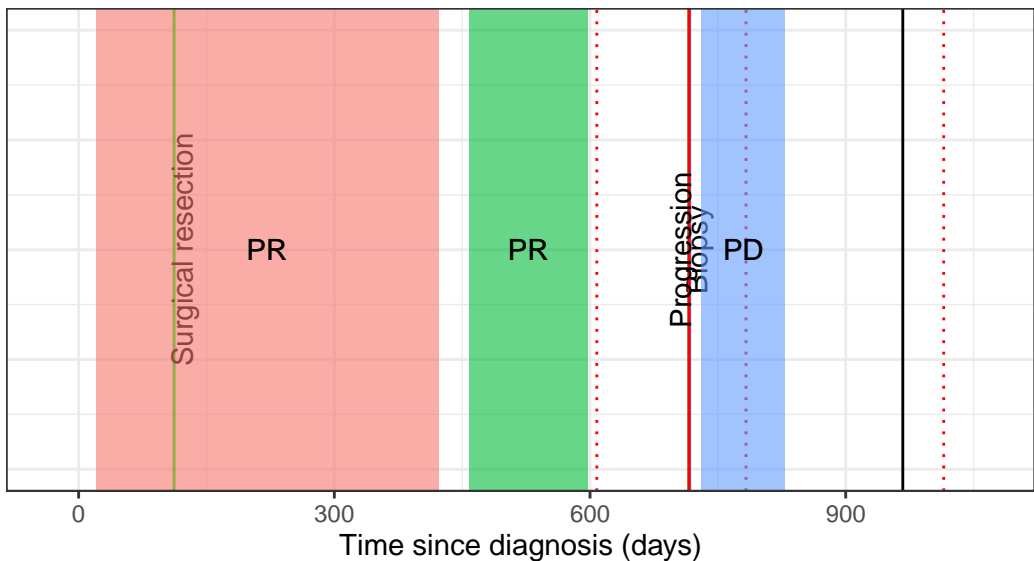

drug ■ Bevacizumab + Carboplatin + Paclitaxel ■ Carboplatin + PLD ■ Paclitaxel

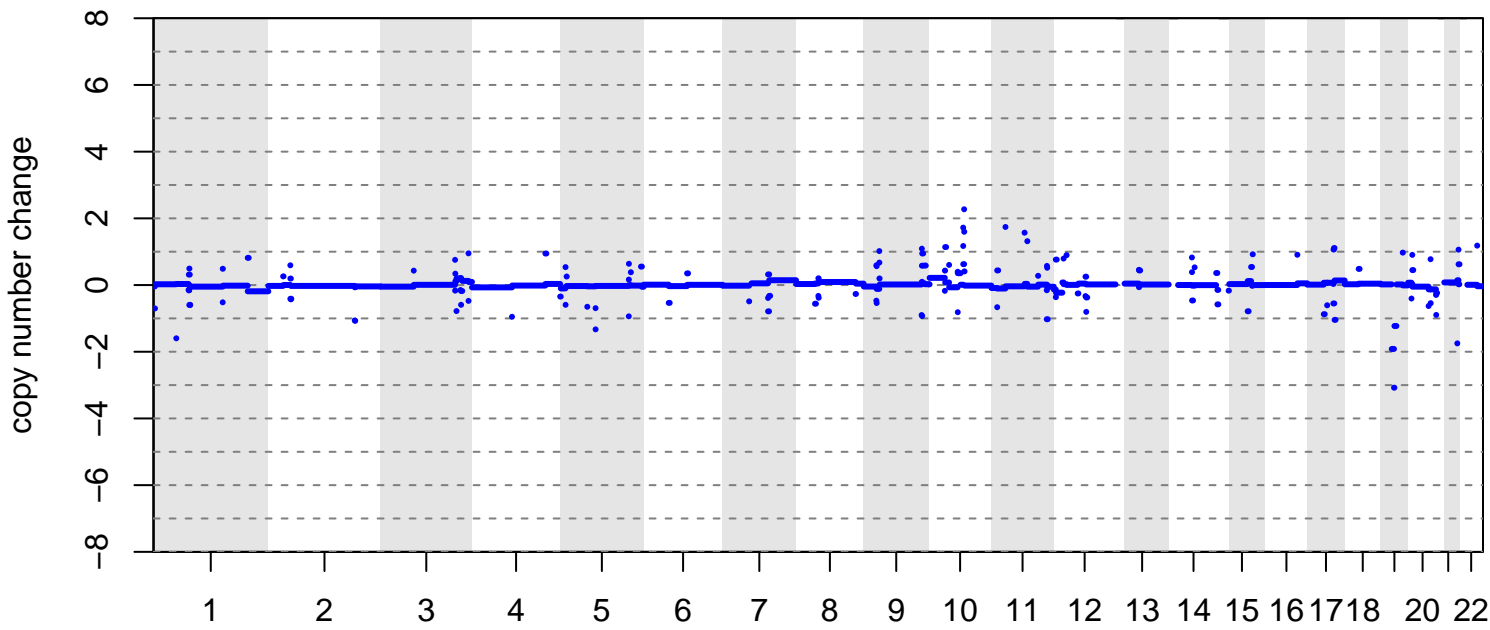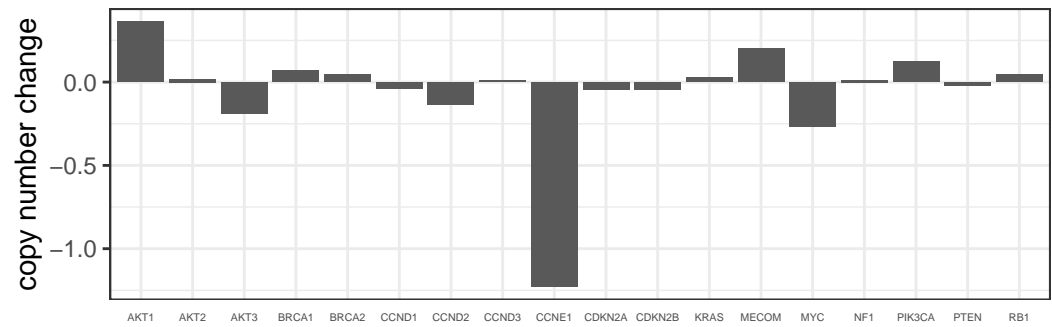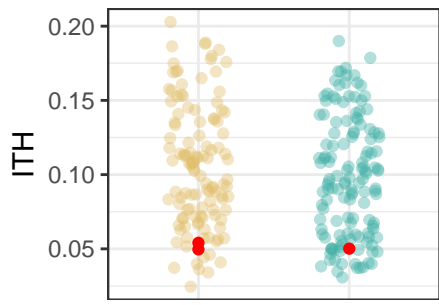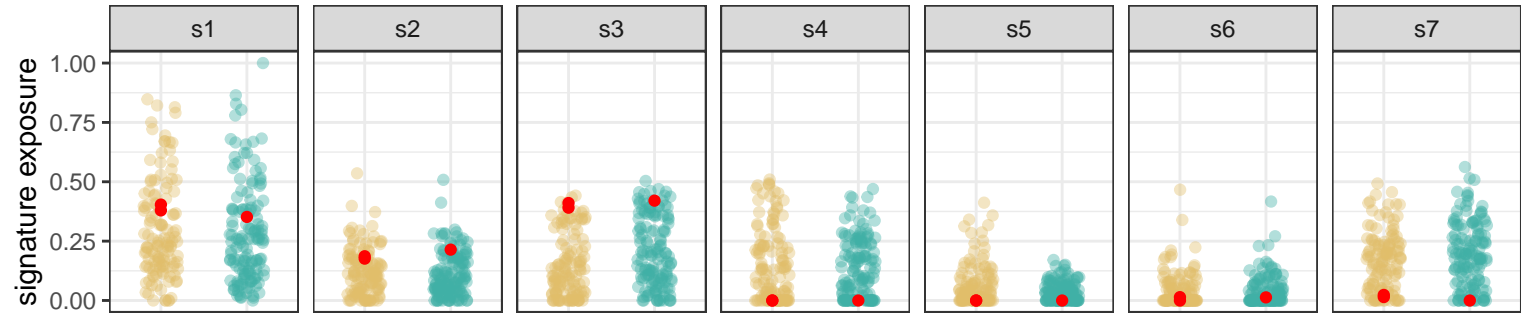

group ● diagnosis ● relapse

# BRITROC-271

stage: 2C  
platinum status: sensitive  
prior lines: 1

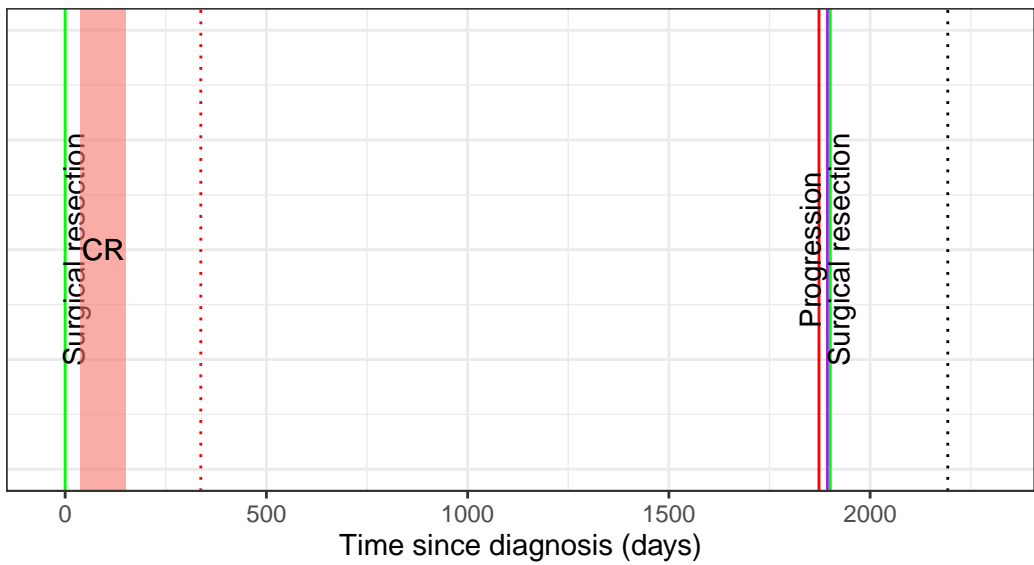

drug Carboplatin + Paclitaxel

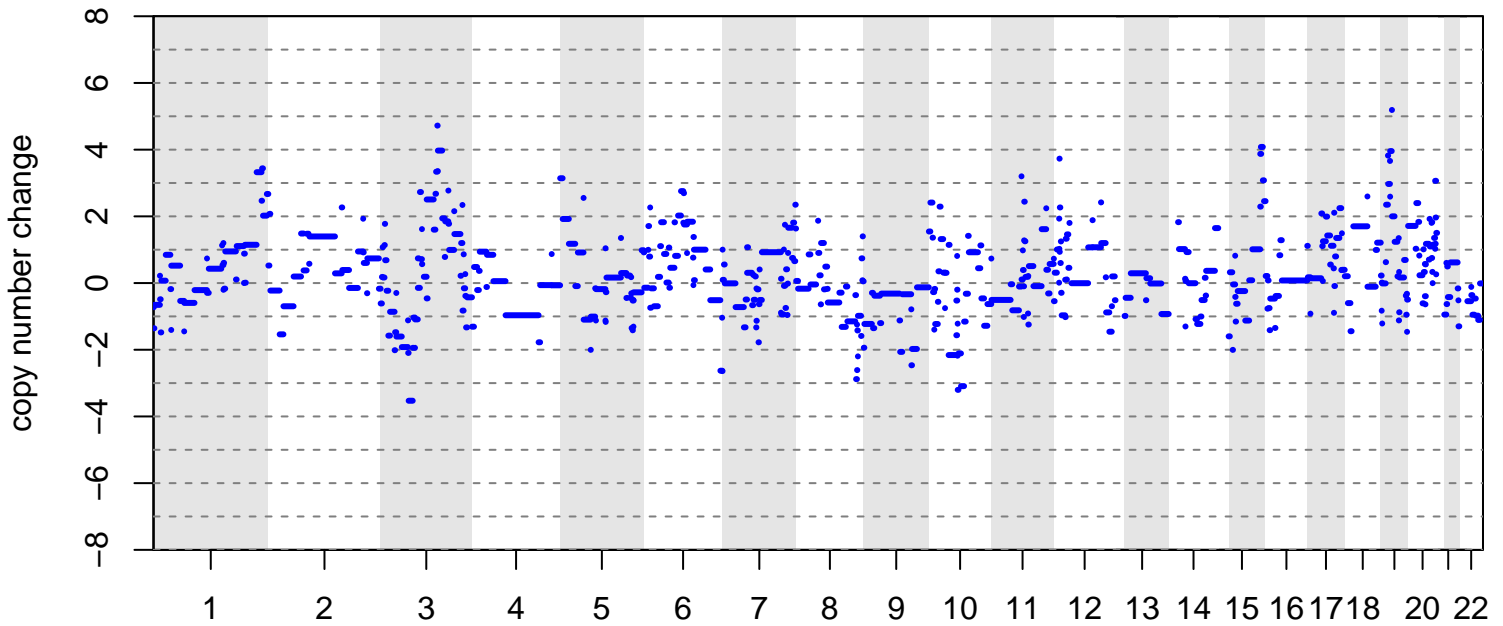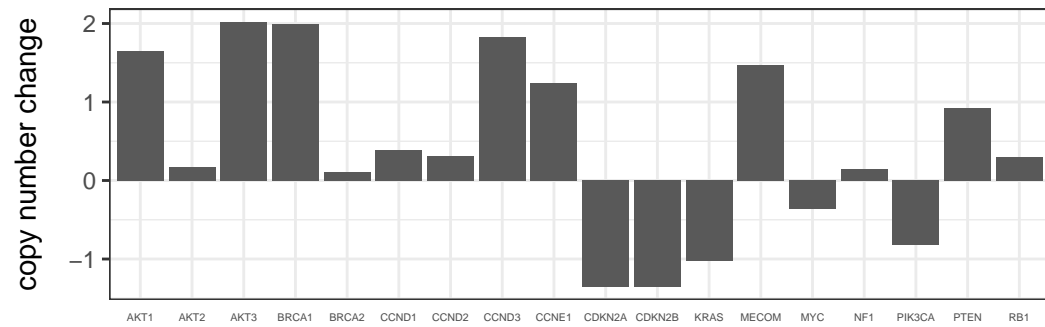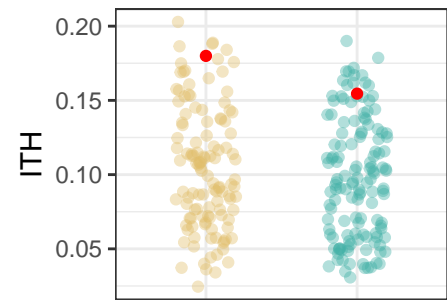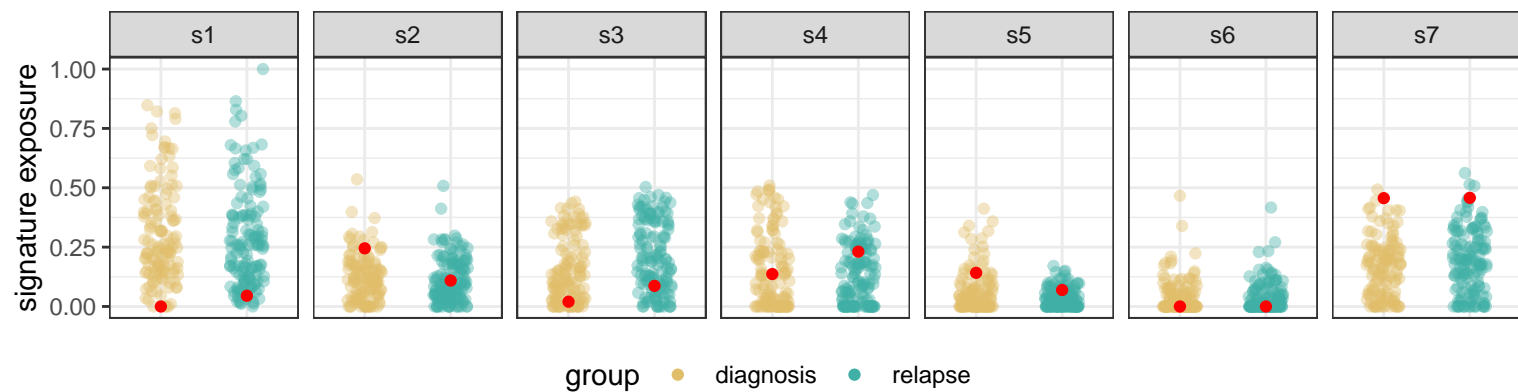

BRITROC-274

stage: 2B  
 platinum status: sensitive  
 prior lines: 2

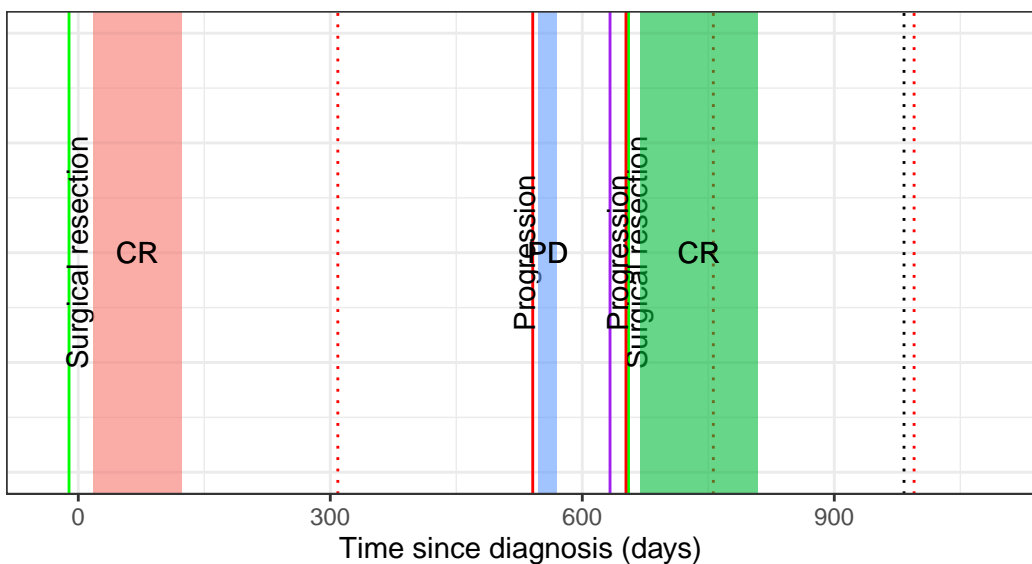

drug ■ Carboplatin + Paclitaxel ■ Letrozole ■ Carboplatin + PLD

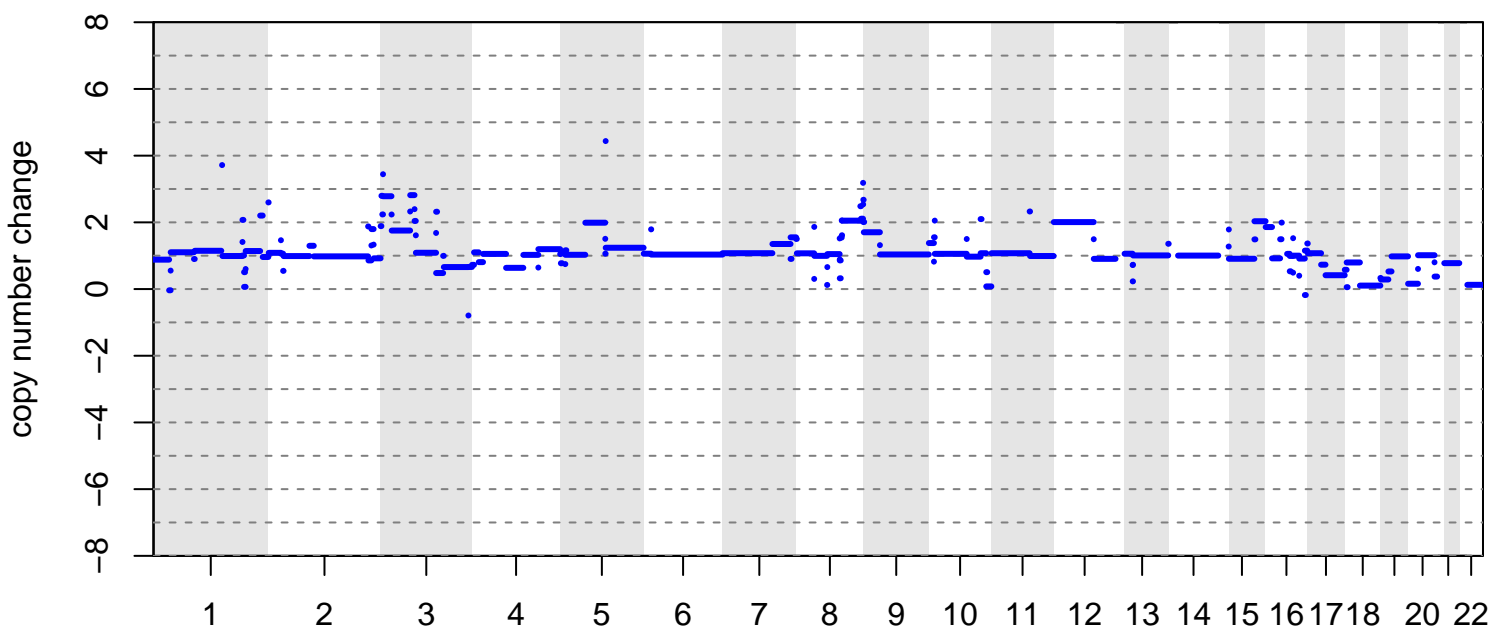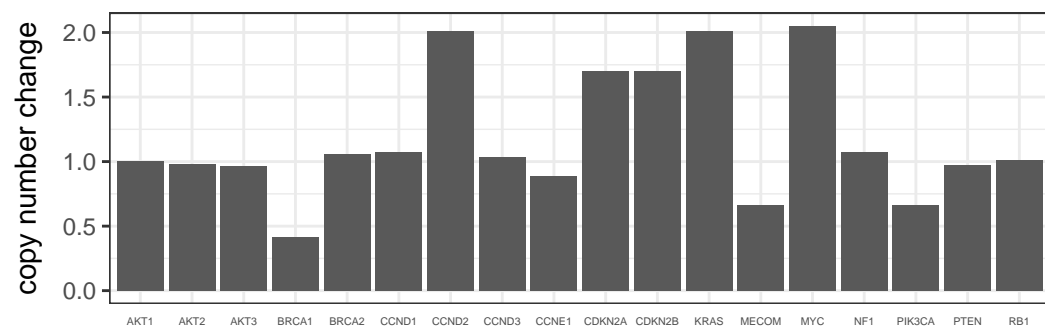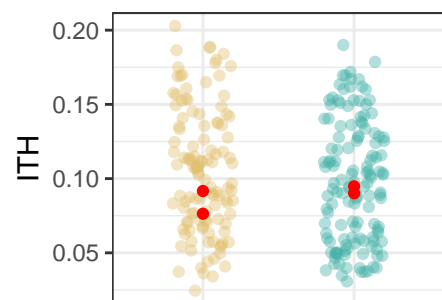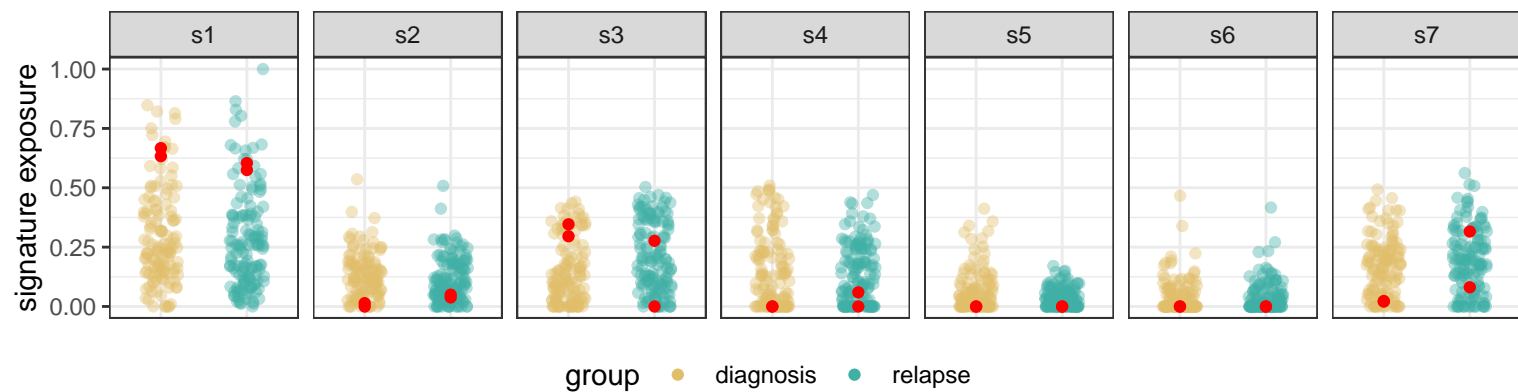

group ● diagnosis ● relapse



# BRITROC-32

stage: 3C

platinum status: resistant

prior lines: 1

clinical timeline unavailable

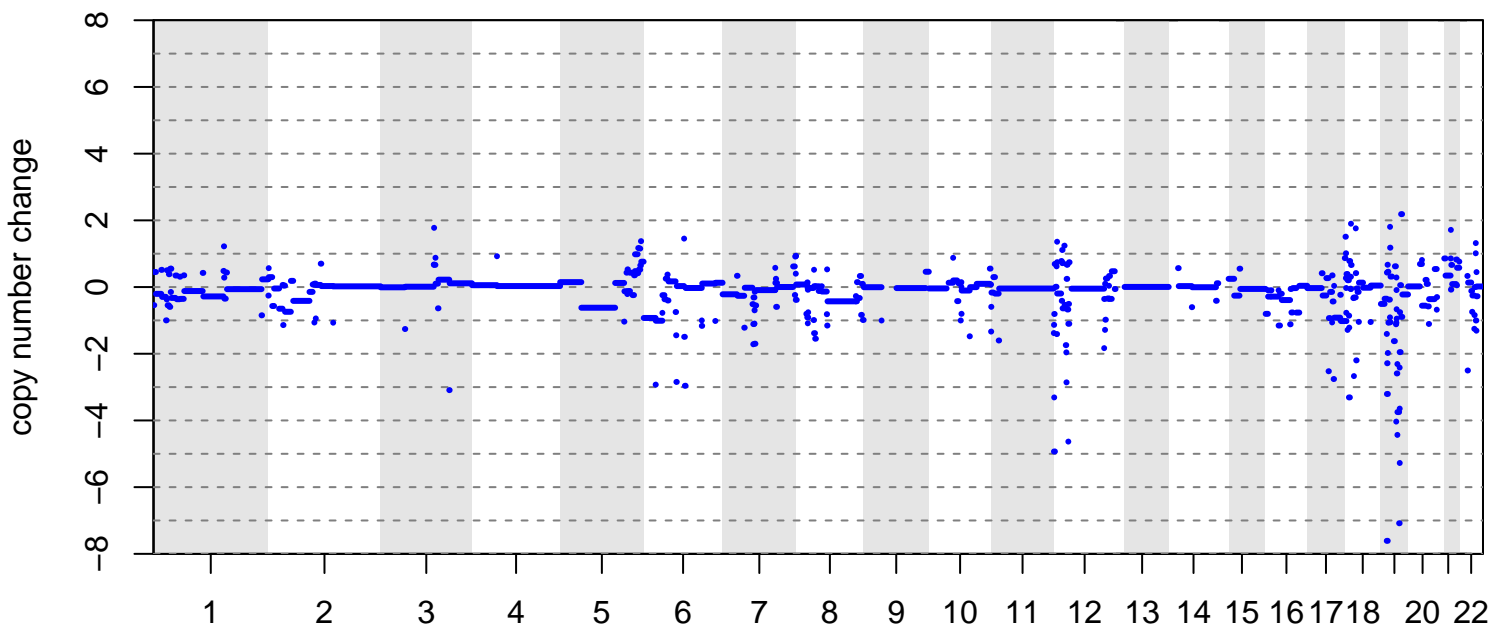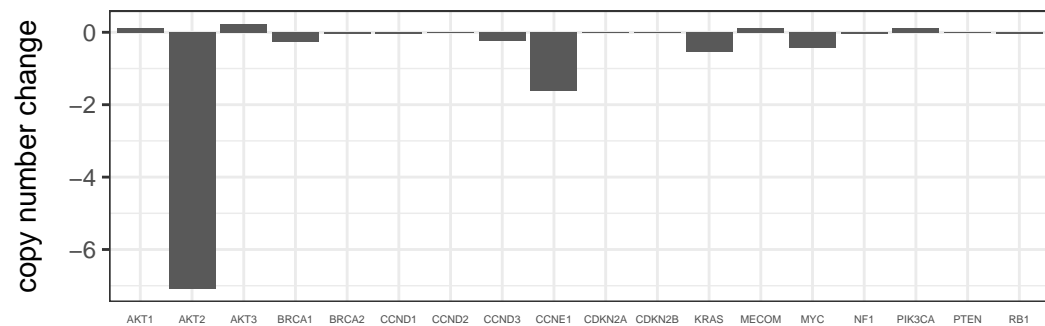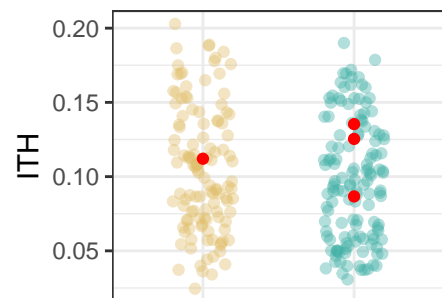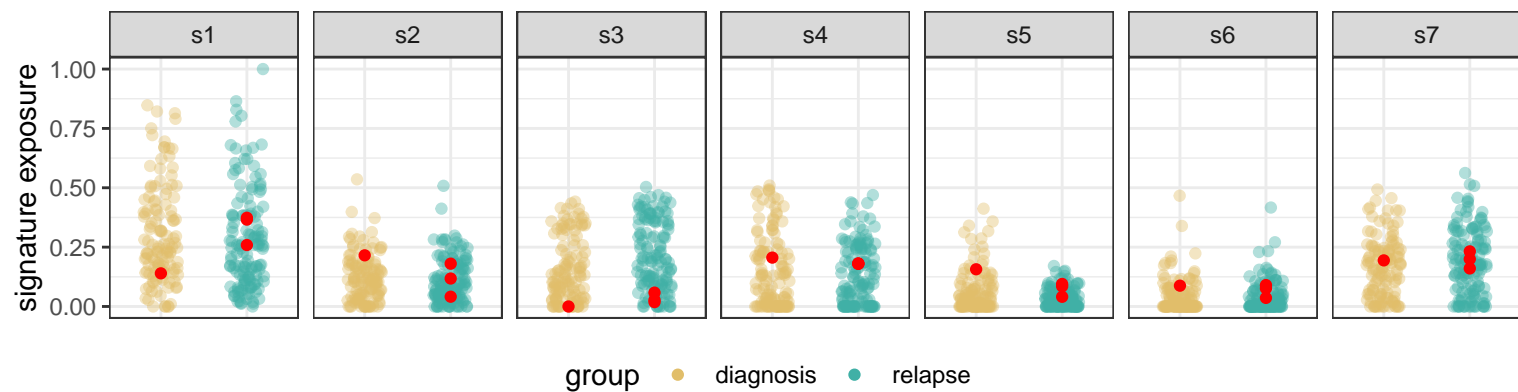

BRITROC-34

stage: 3C

platinum status: sensitive

prior lines: 1

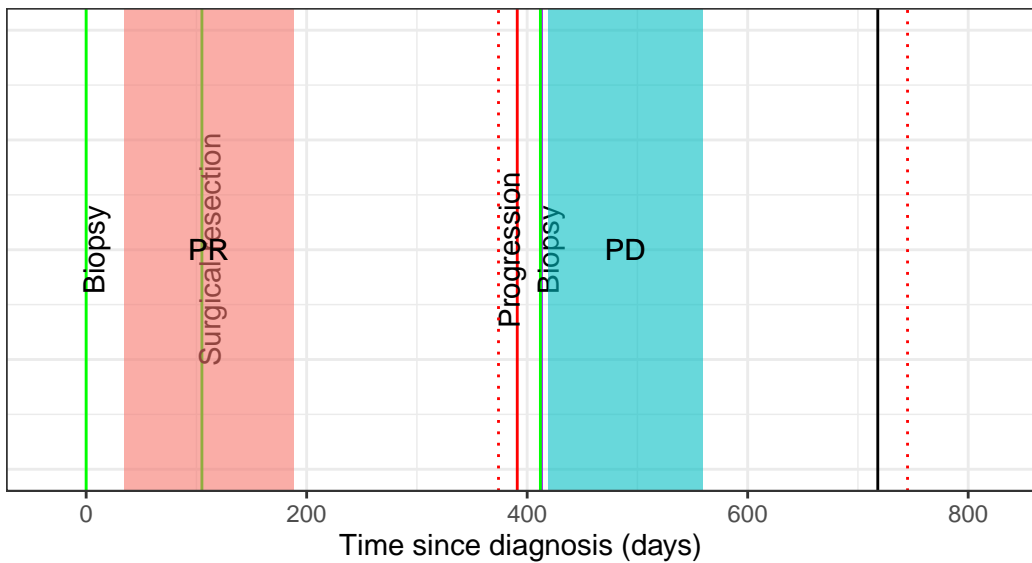

drug Carboplatin + Paclitaxel Carboplatin + PLD

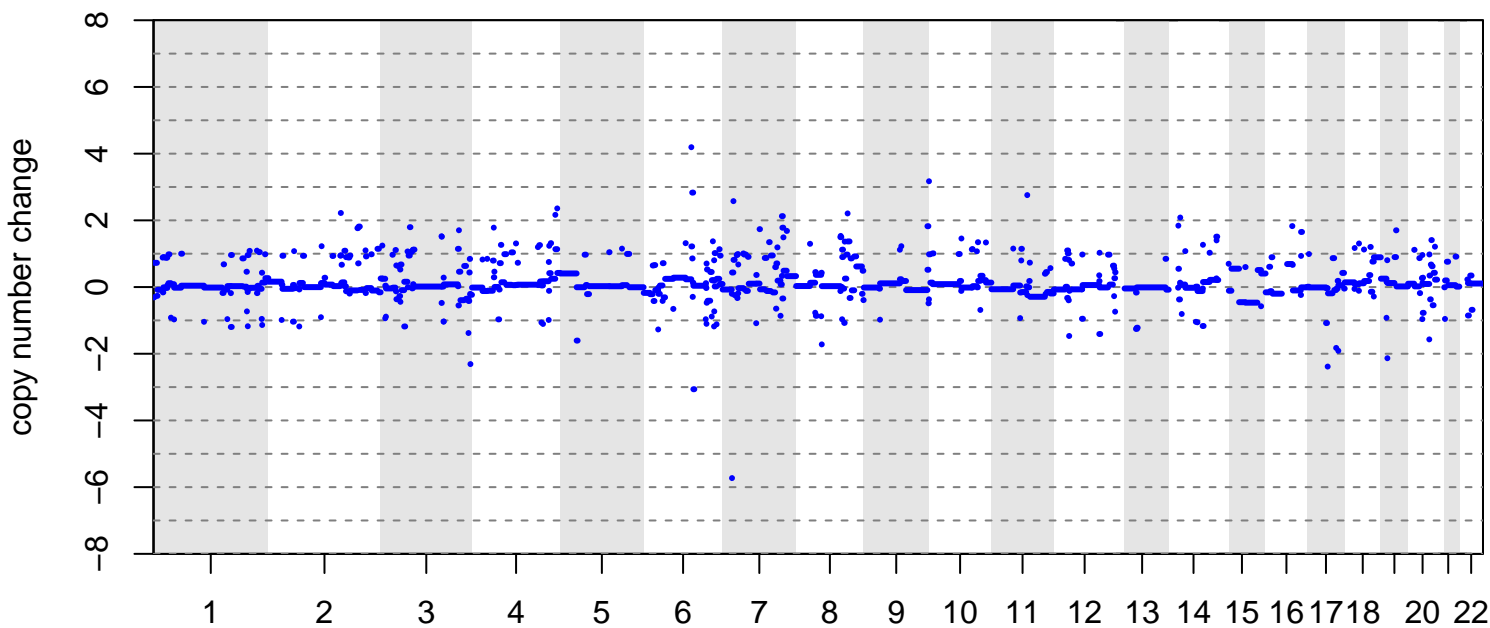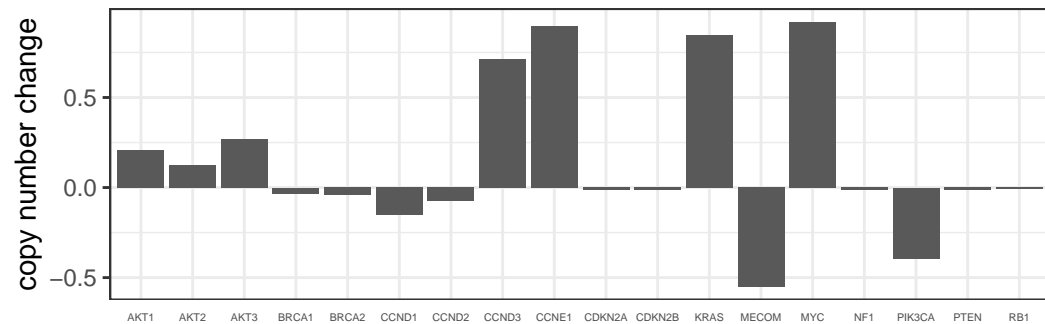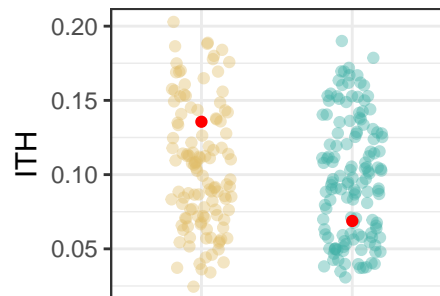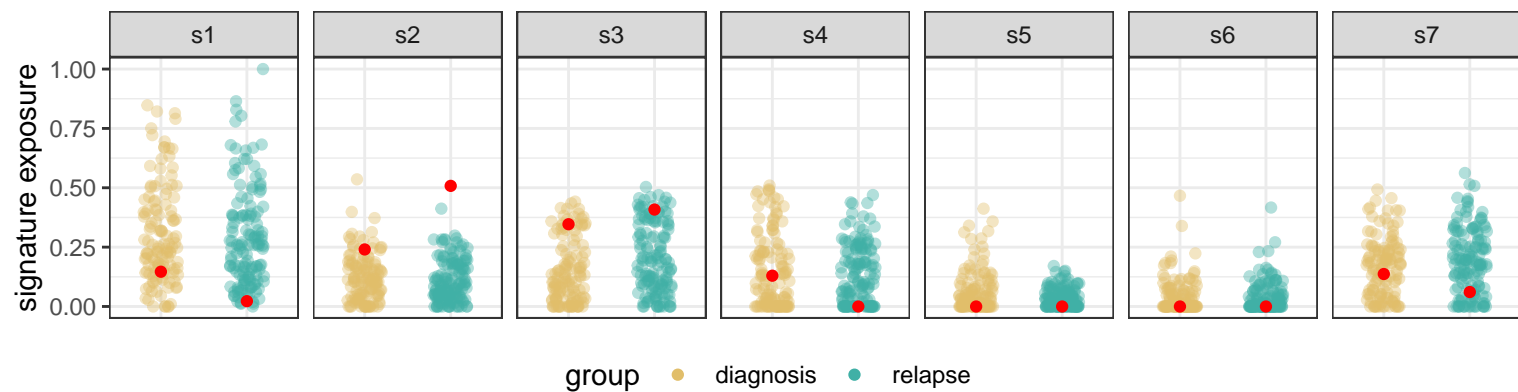

group diagnosis relapse

# BRITROC-36

stage: 3B  
platinum status: sensitive  
prior lines: 1

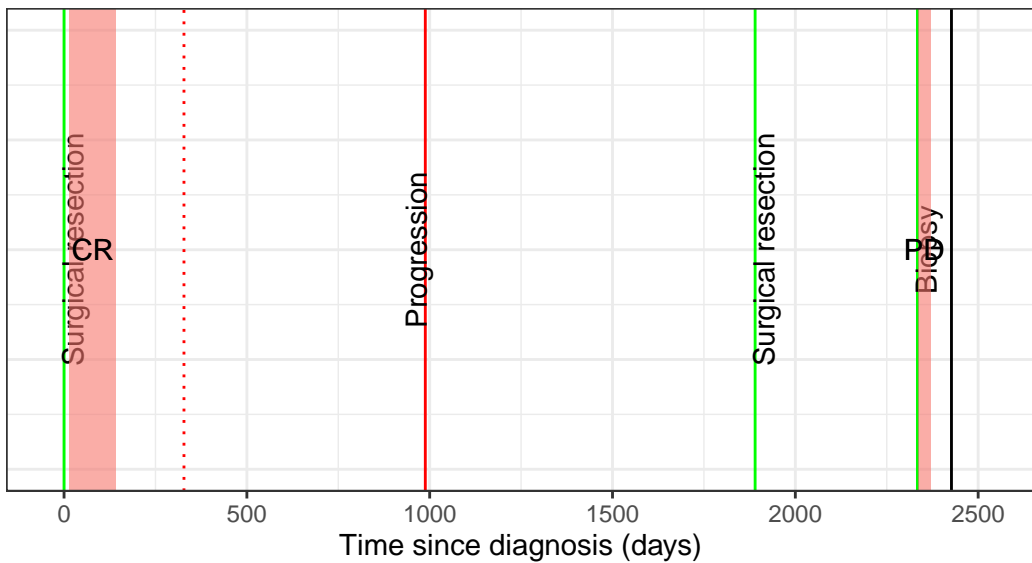

drug ■ Carboplatin

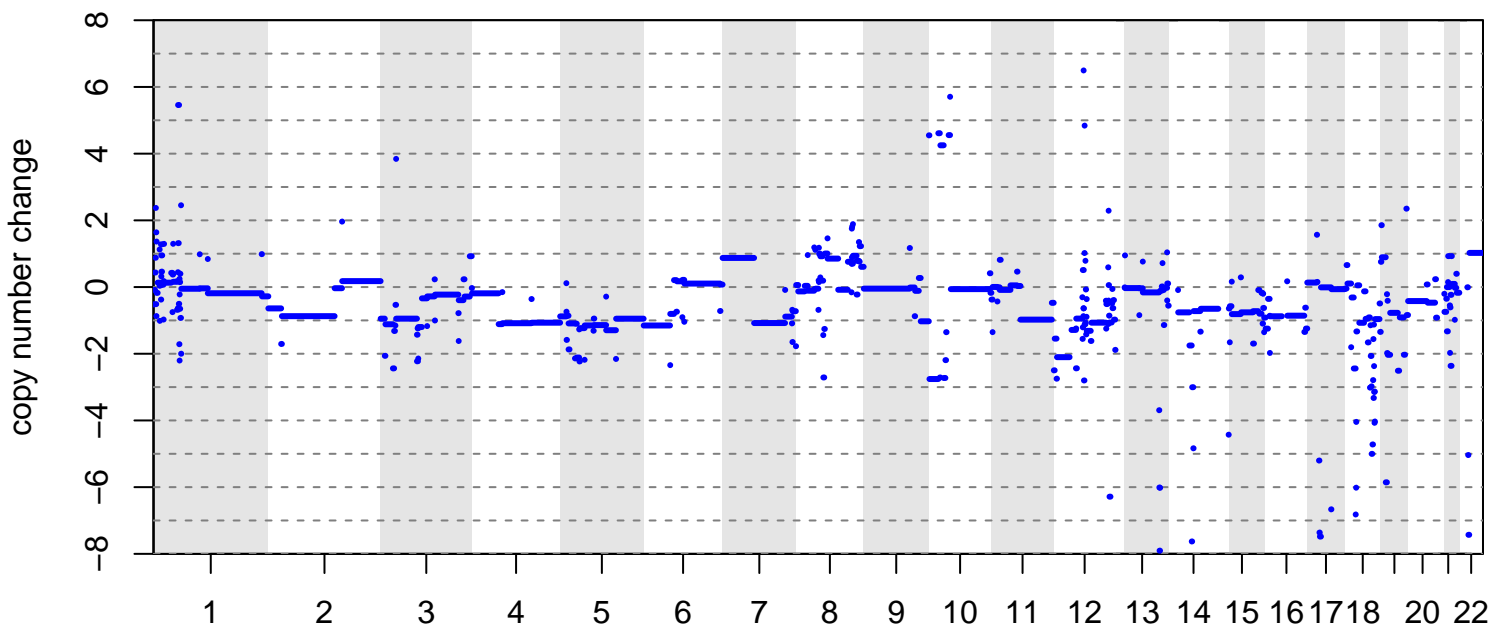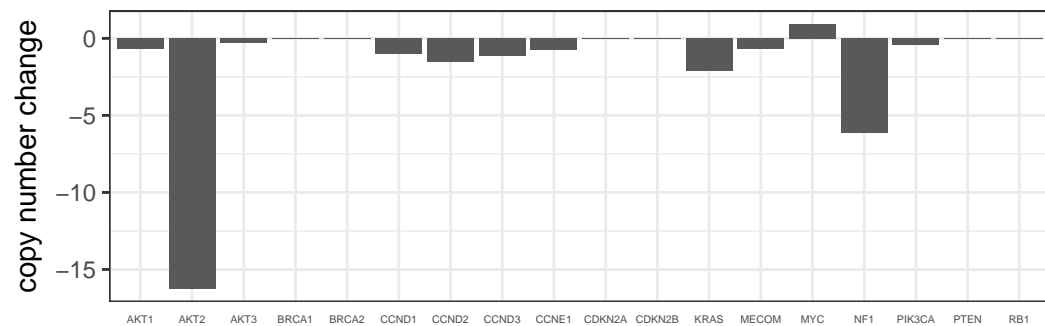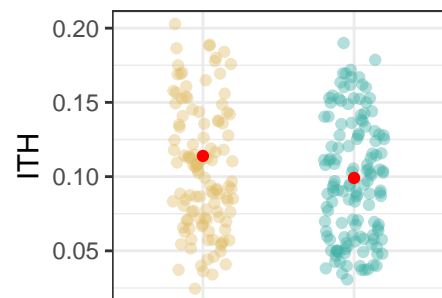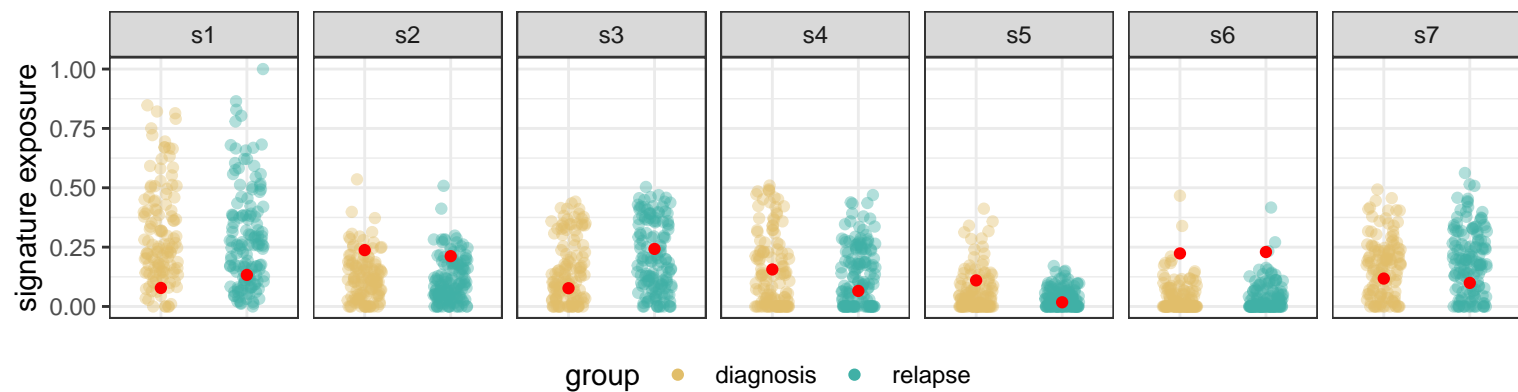

# BRITROC-37

stage: 3C  
platinum status: sensitive  
prior lines: 1

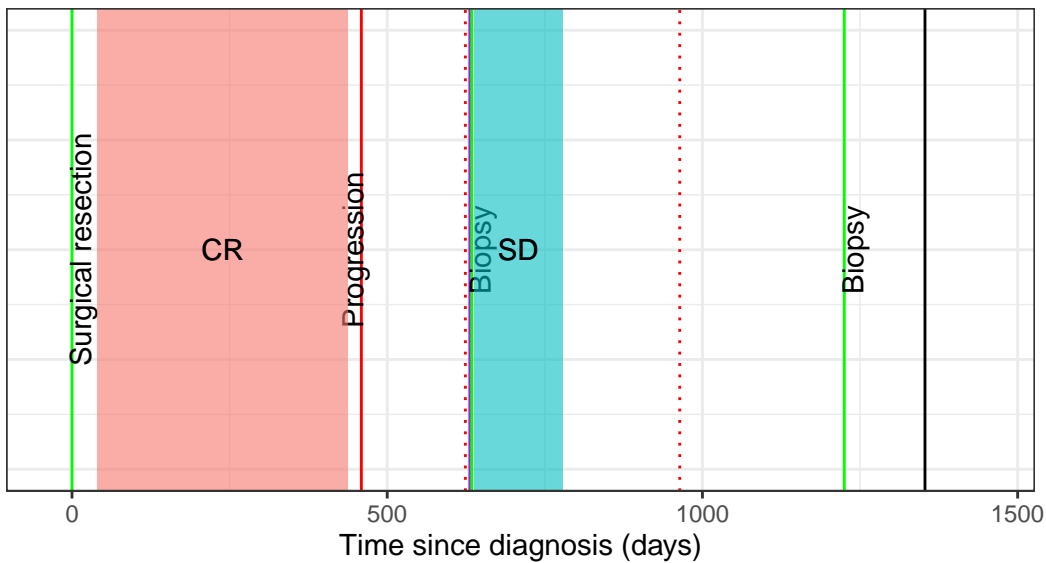

drug ■ Bevacizumab + Carboplatin + Paclitaxel ■ Carboplatin

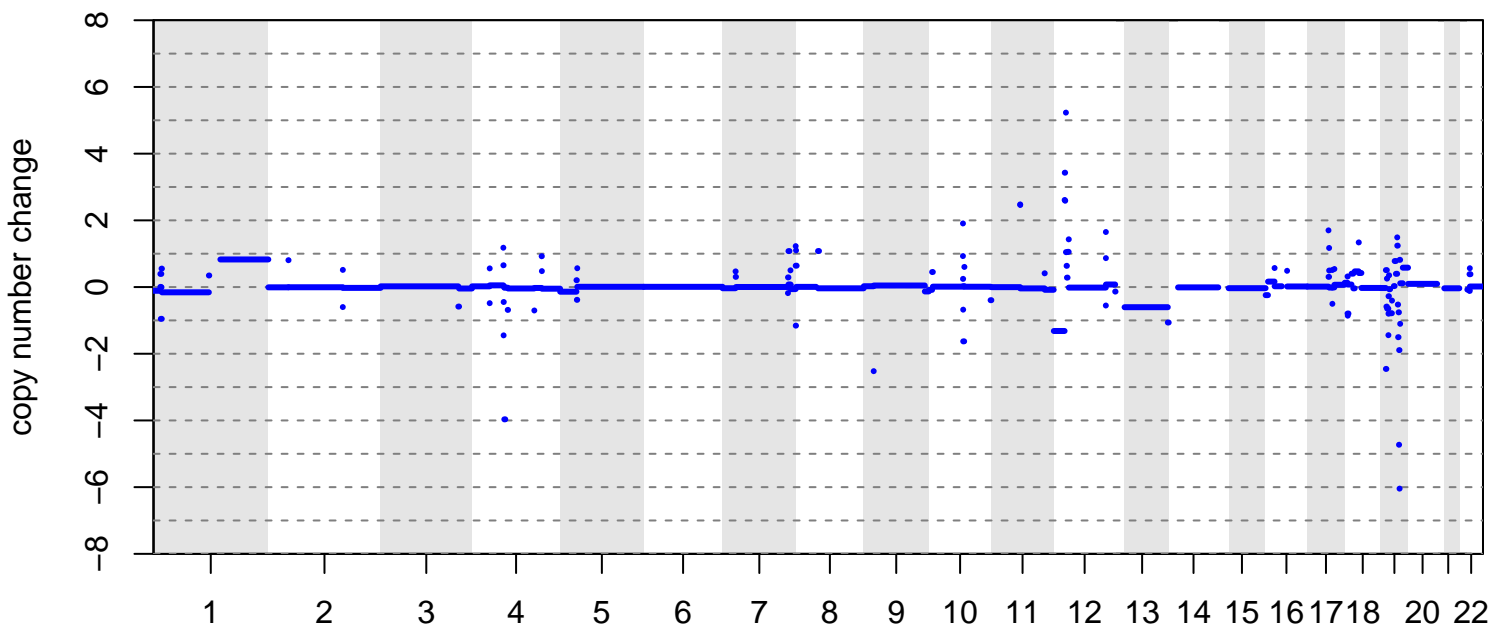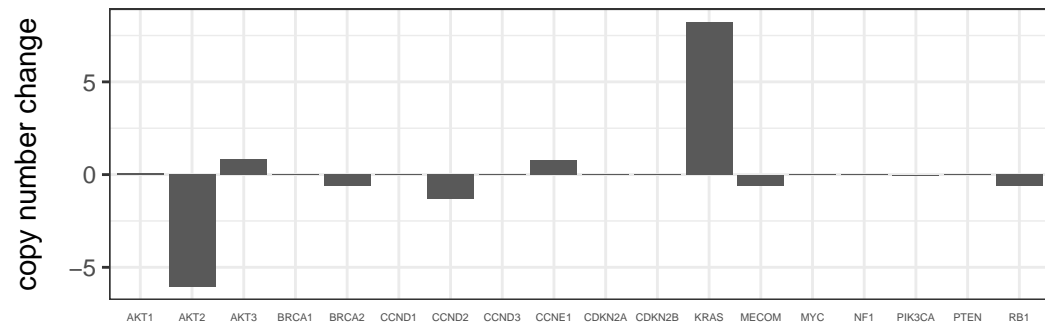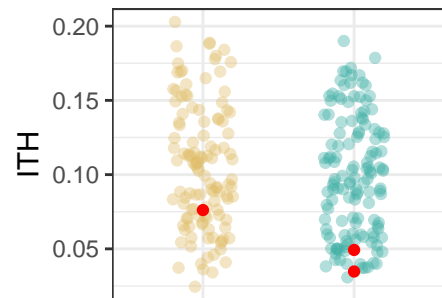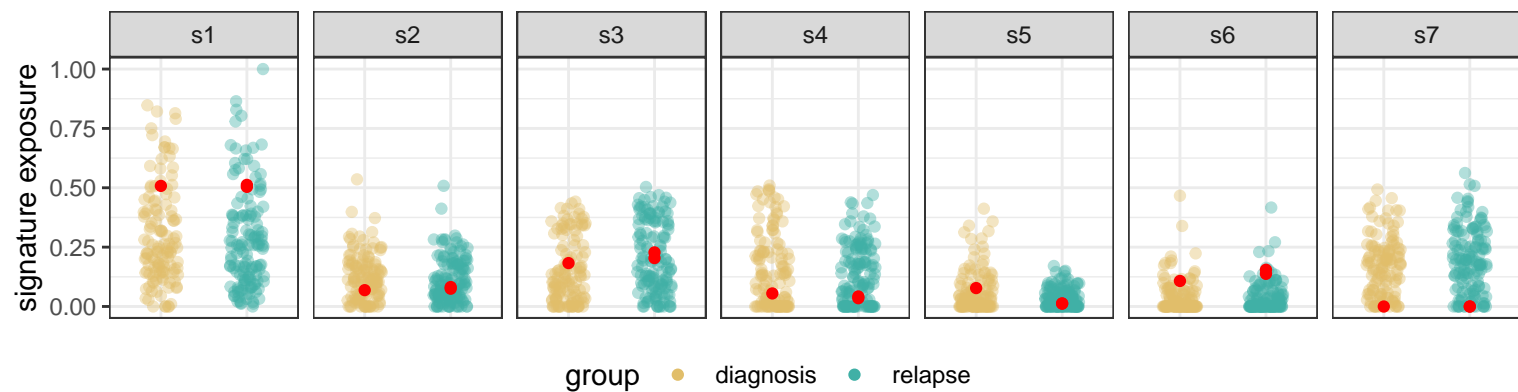

# BRITROC-39

stage: 3A  
platinum status: sensitive  
prior lines: 1

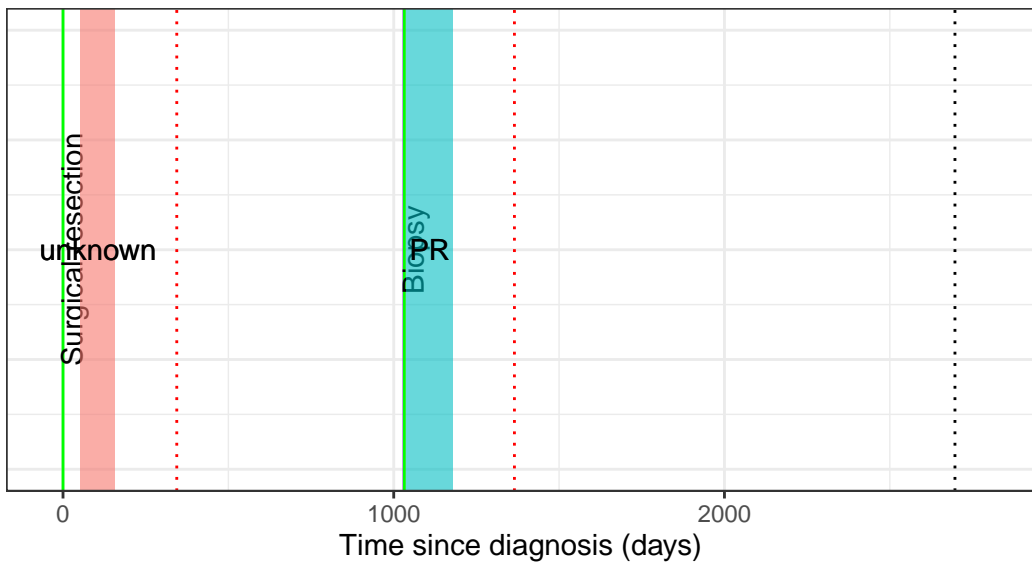

drug Carboplatin + Paclitaxel Carboplatin + PLD

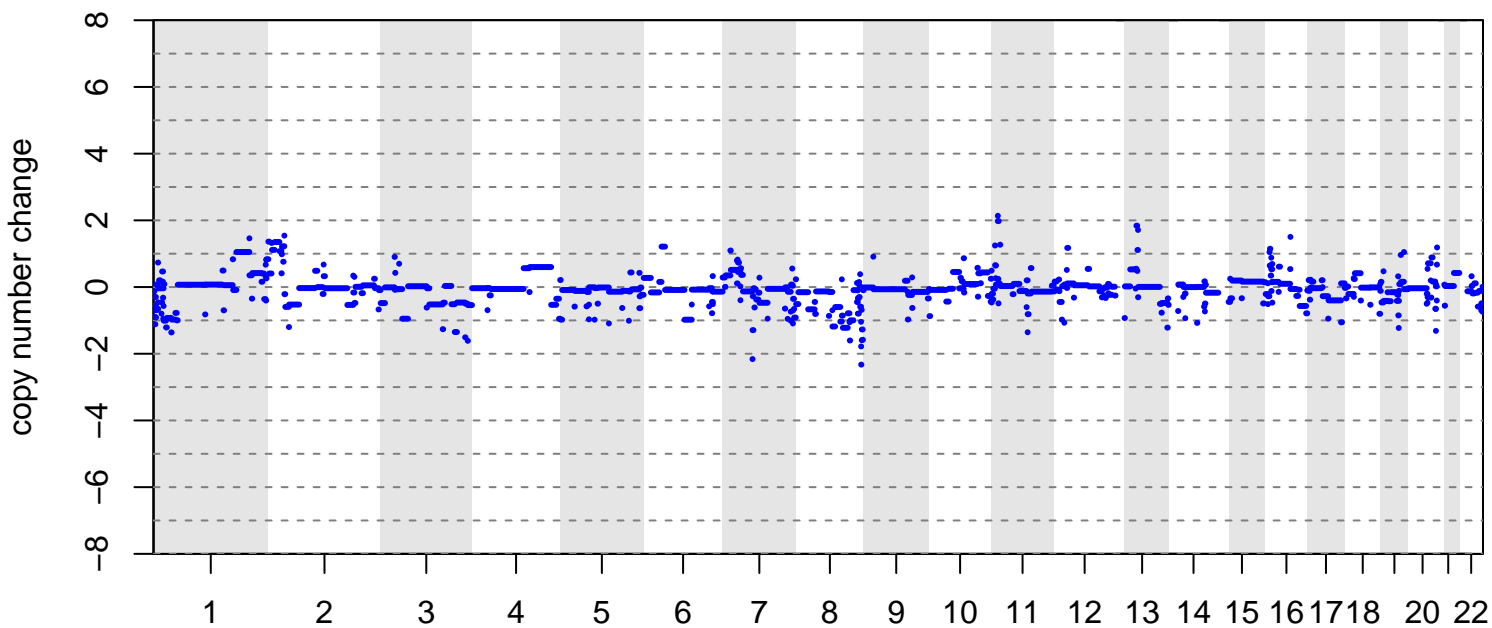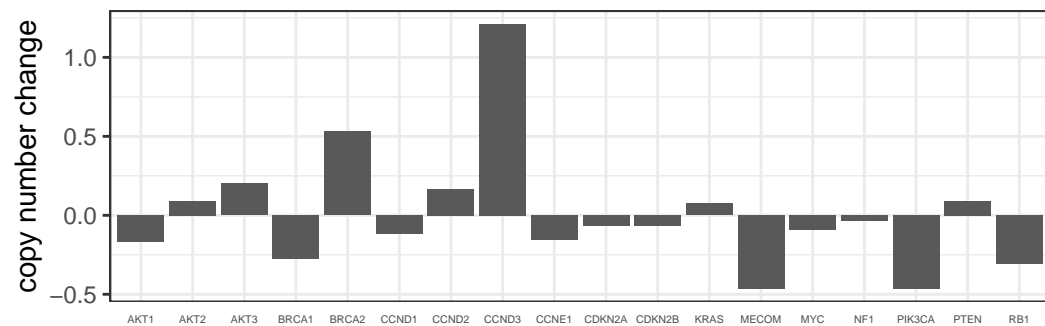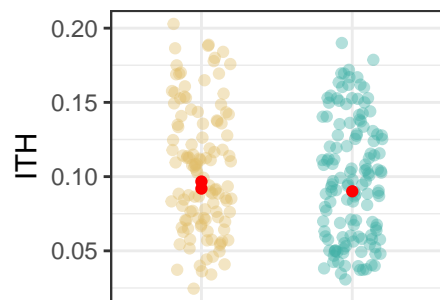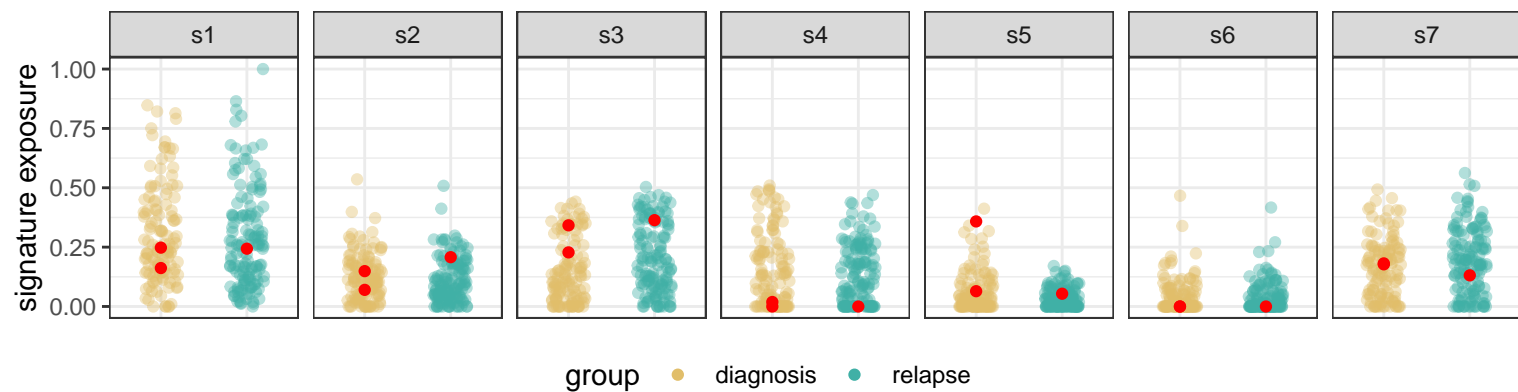

BRITROC-5

stage: 3C  
 platinum status: sensitive  
 prior lines: 2

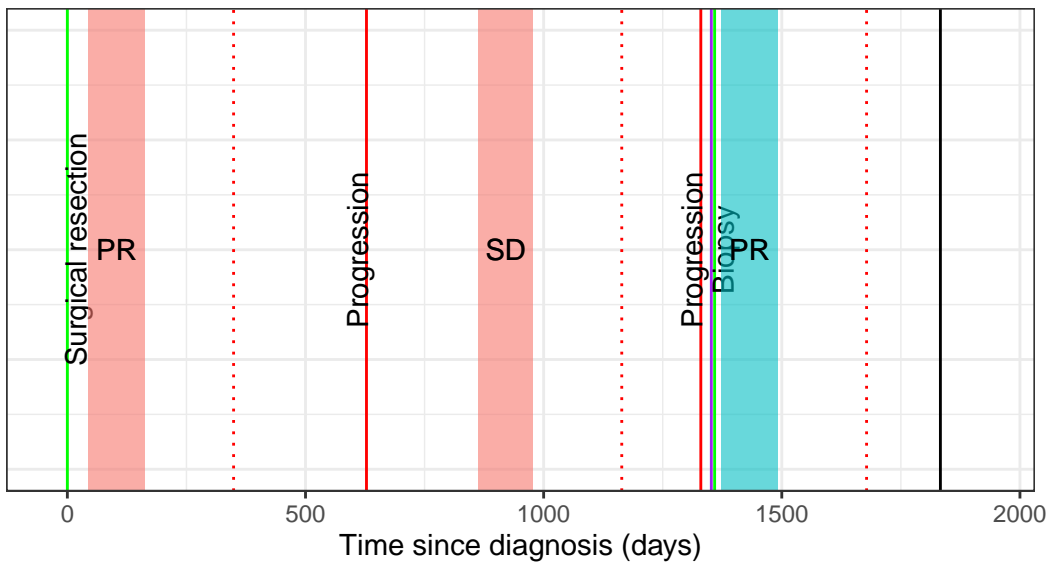

drug ■ Carboplatin + Paclitaxel ■ Cisplatin + PLD

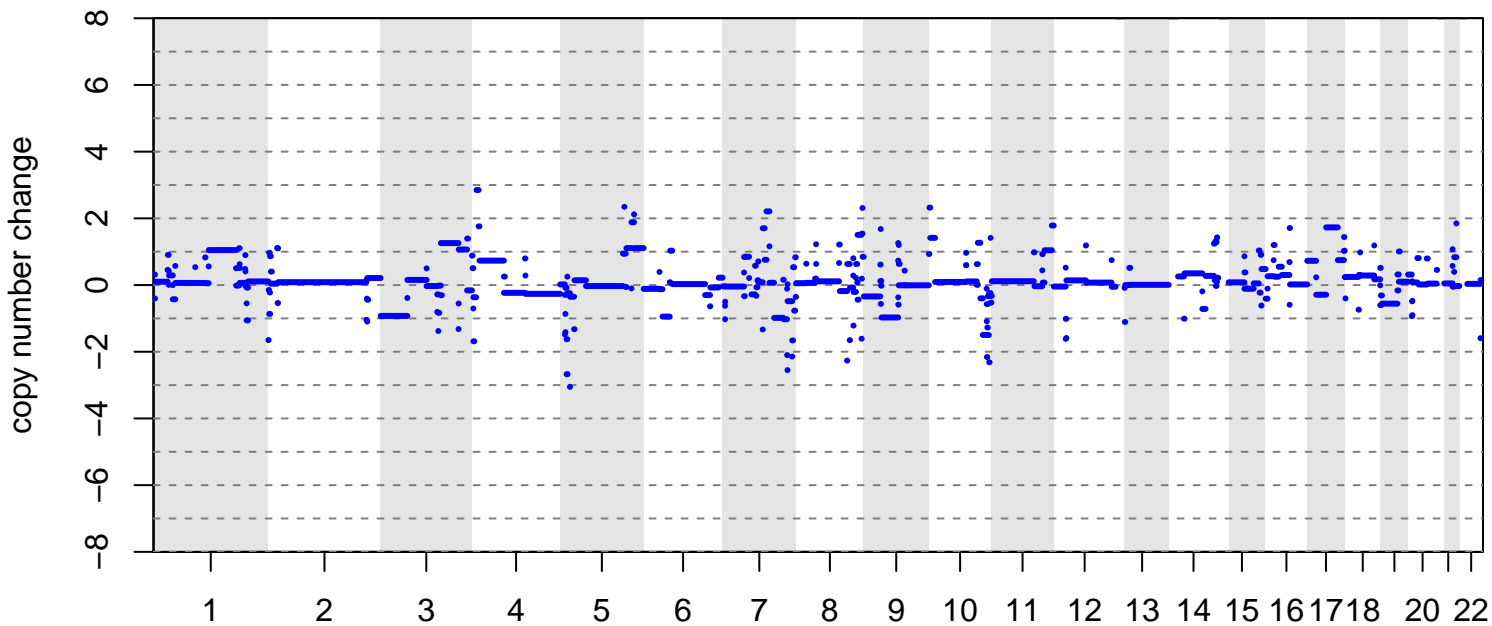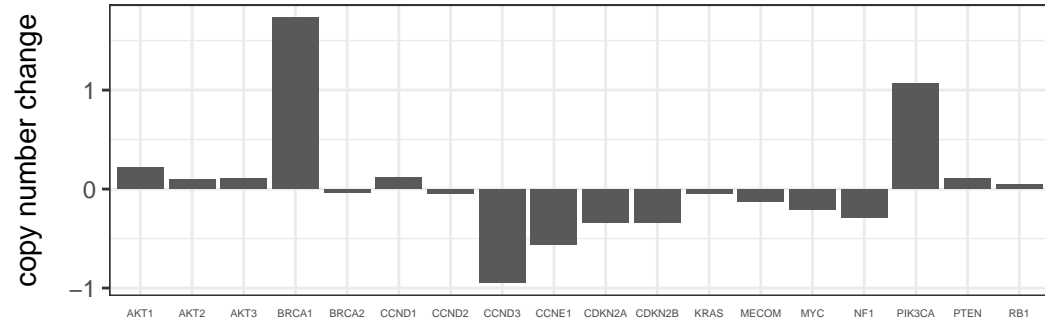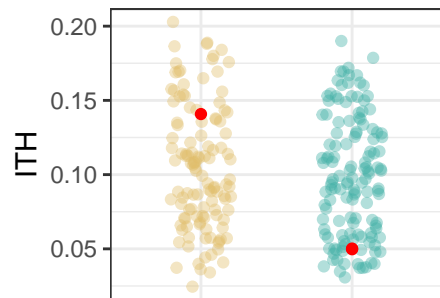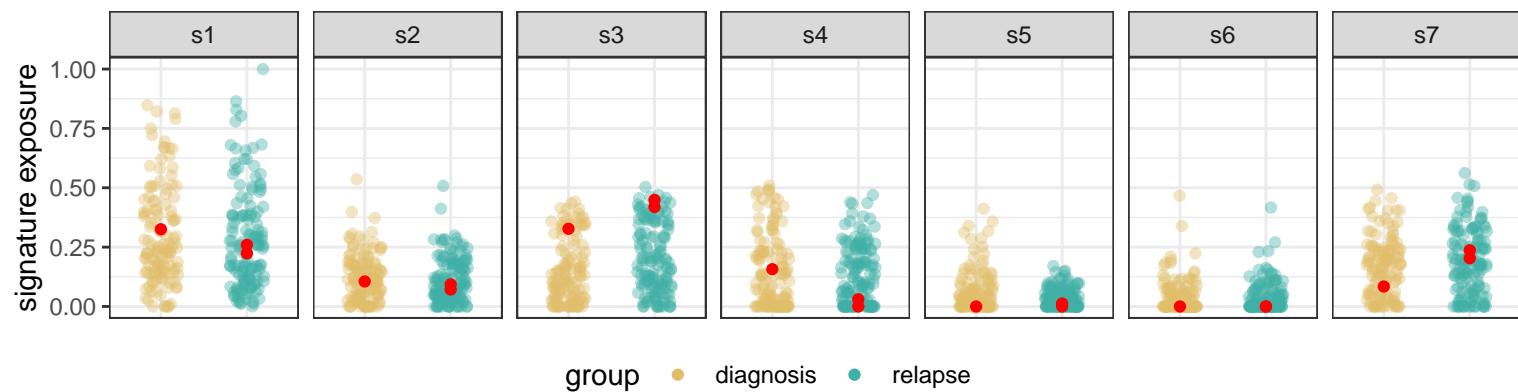

group ● diagnosis ● relapse

# BRITROC-55

stage: 1C

platinum status: sensitive

prior lines: 2

clinical timeline unavailable

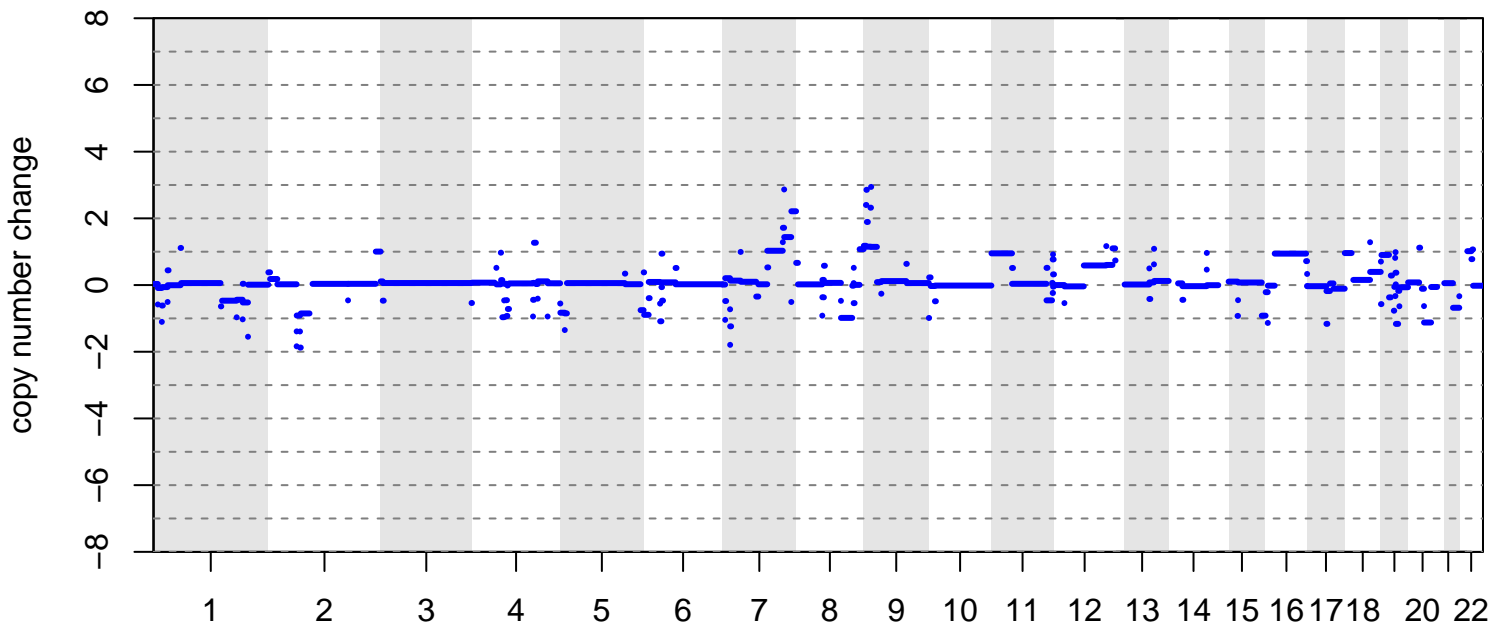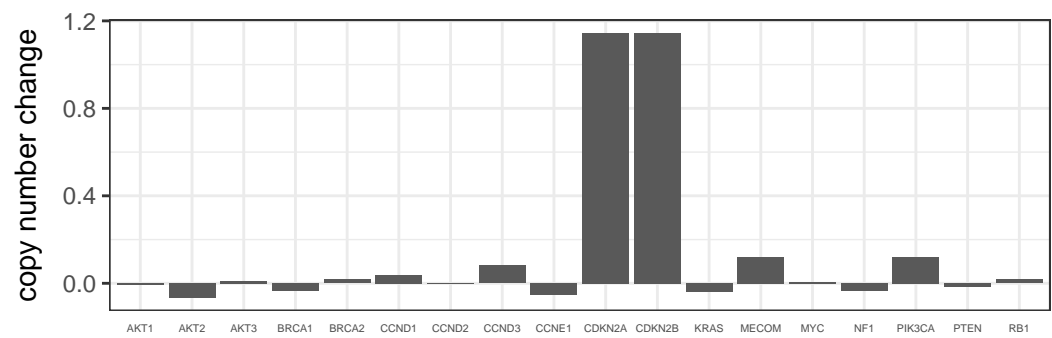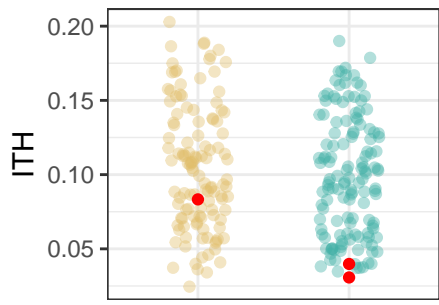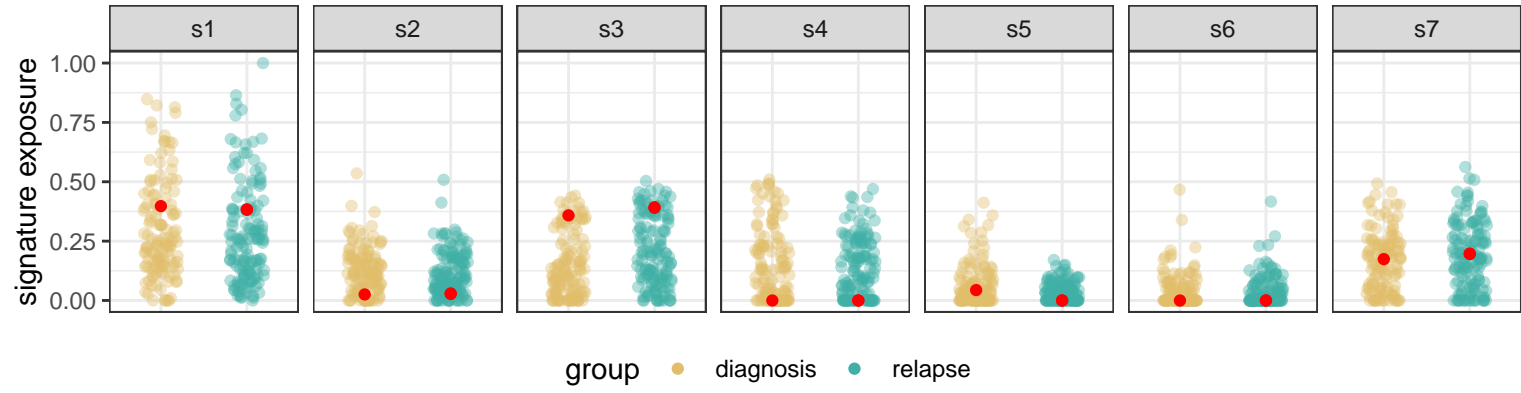

BRITROC-65

stage: 3C  
 platinum status: sensitive  
 prior lines: 1

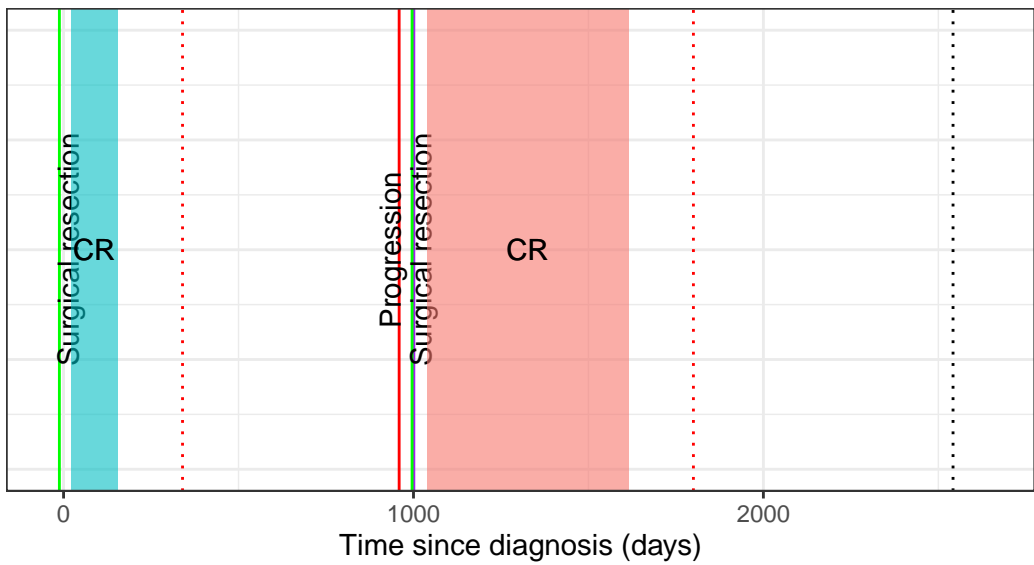

drug ■ Carboplatin + Paclitaxel ■ Bevacizumab + Carboplatin + Gemcitabine

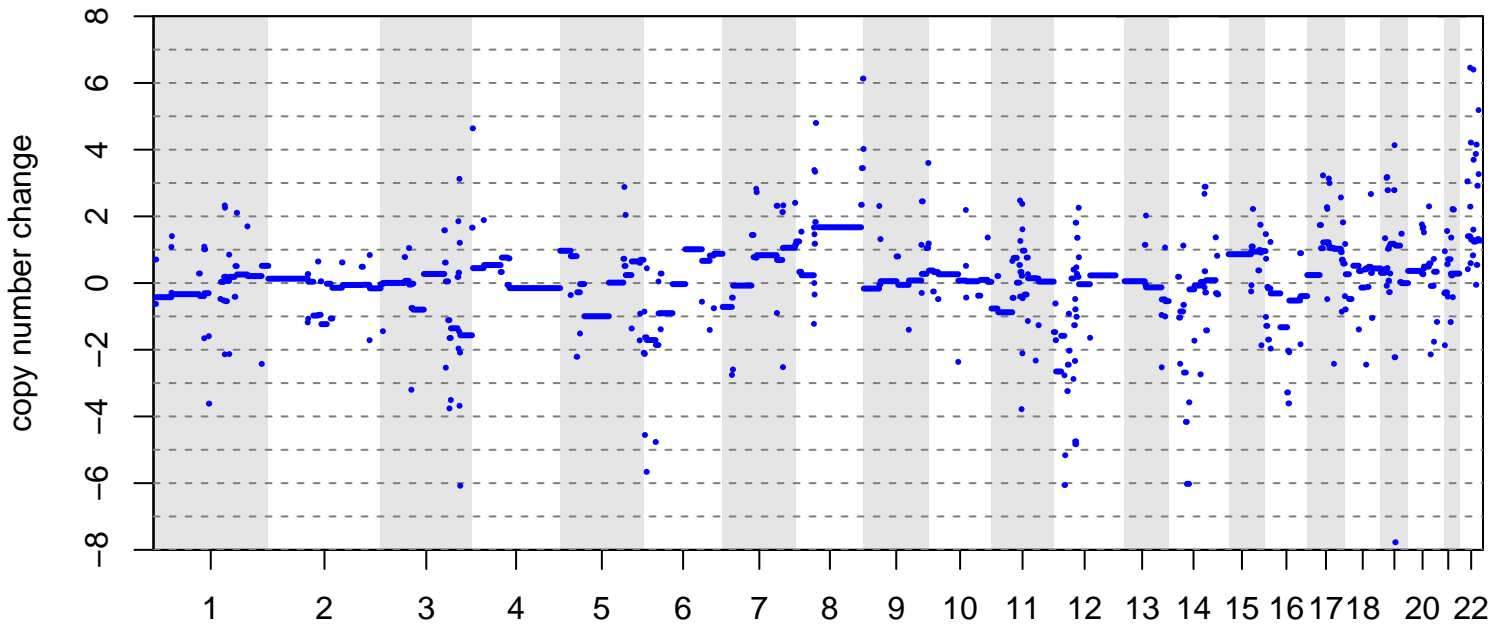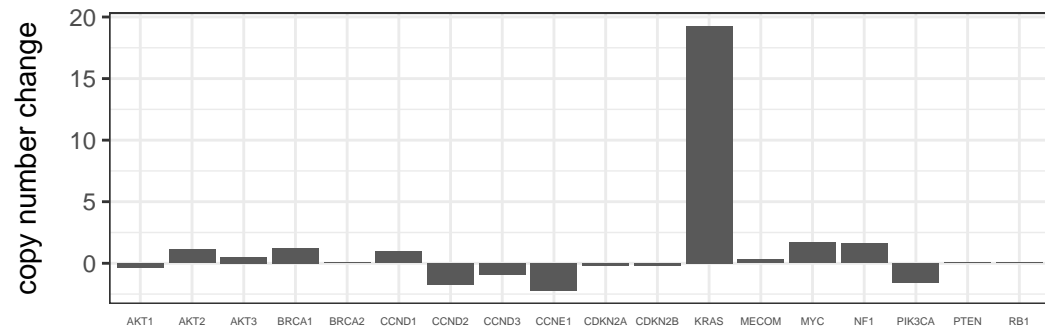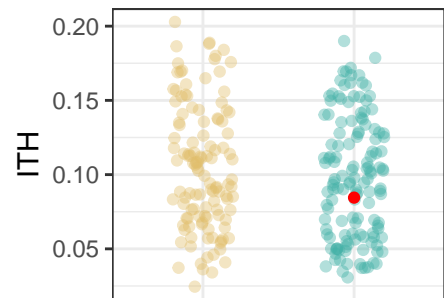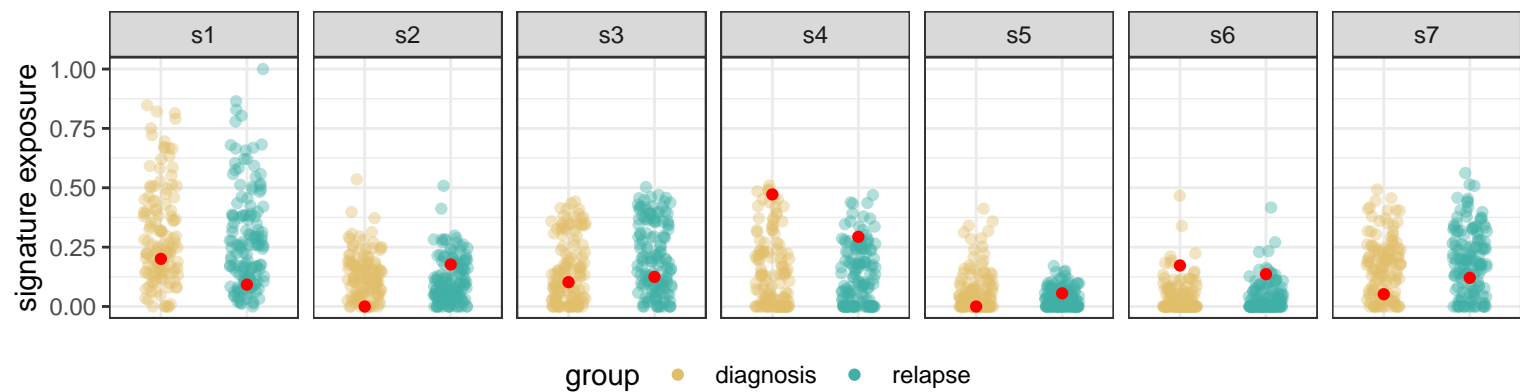



BRITROC-67

stage: 3C

platinum status: sensitive

prior lines: 1

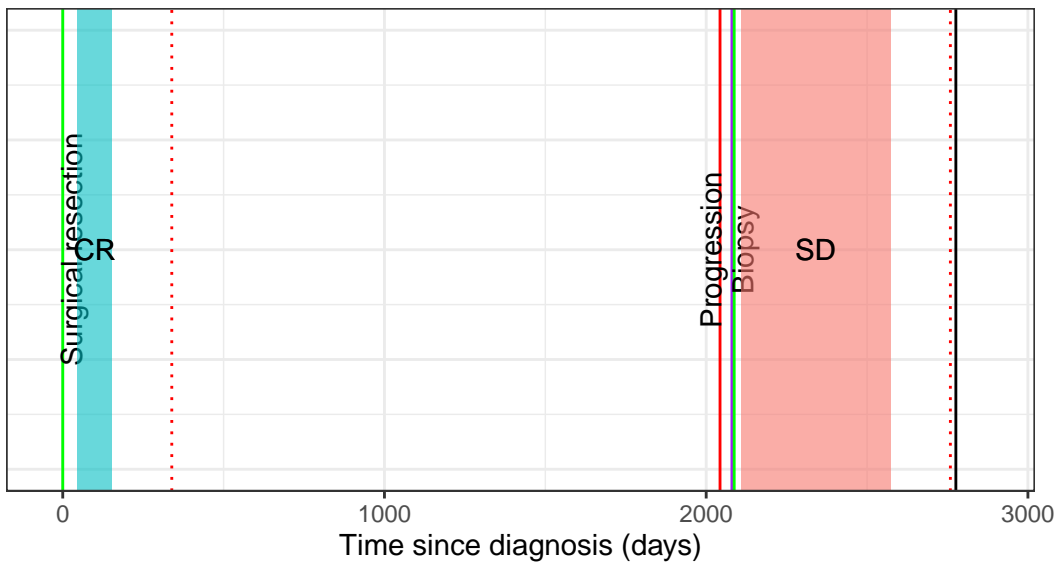

drug ■ Carboplatin + Paclitaxel ■ Bevacizumab + Carboplatin + Gemcitabine

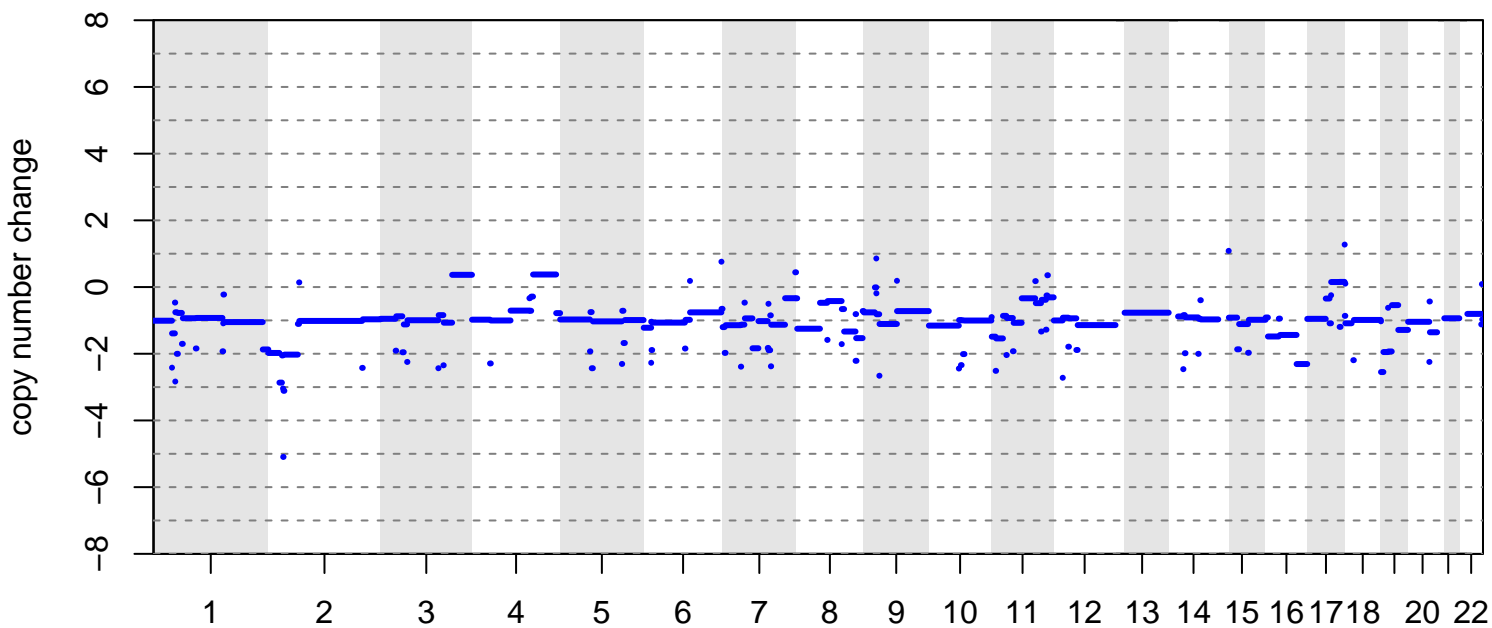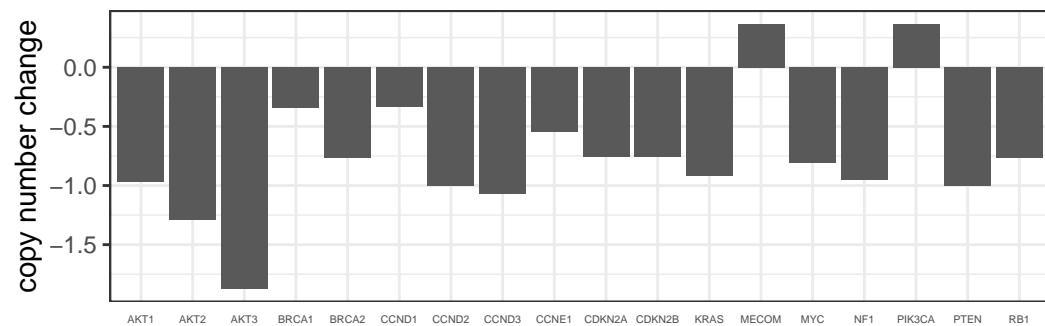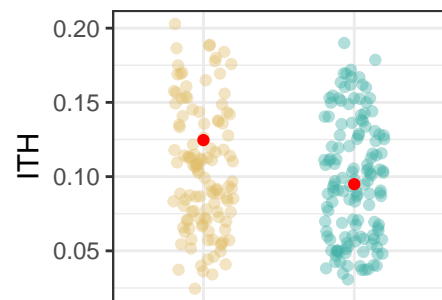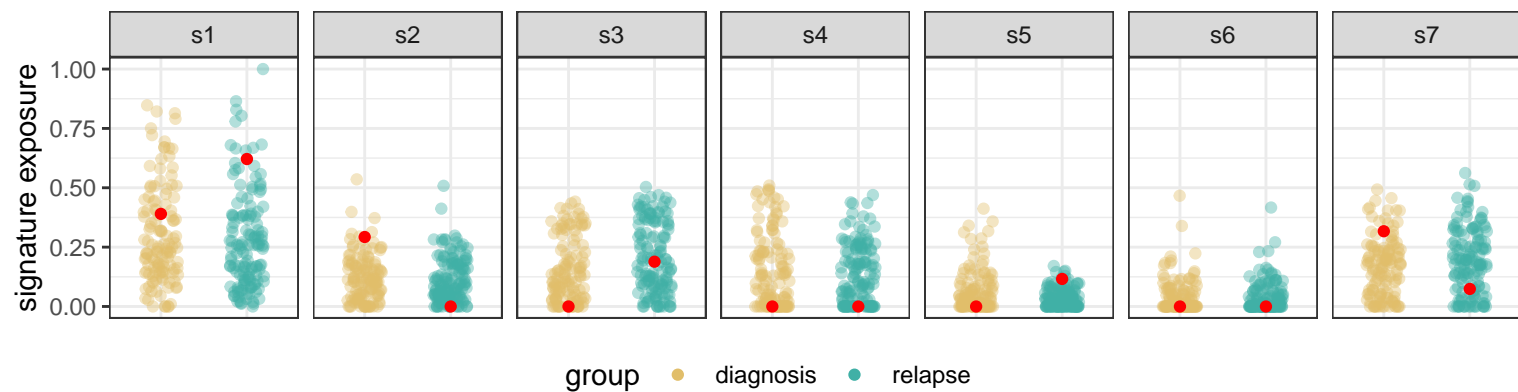

group ● diagnosis ● relapse

# BRITROC-74

stage: 3C  
platinum status: sensitive  
prior lines: 1

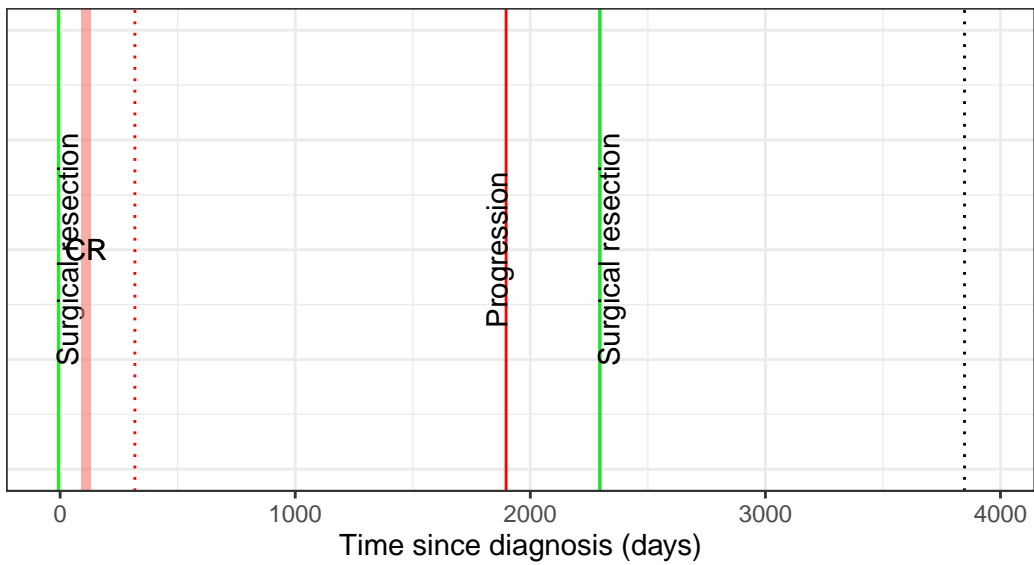

drug █ Carboplatin + Paclitaxel

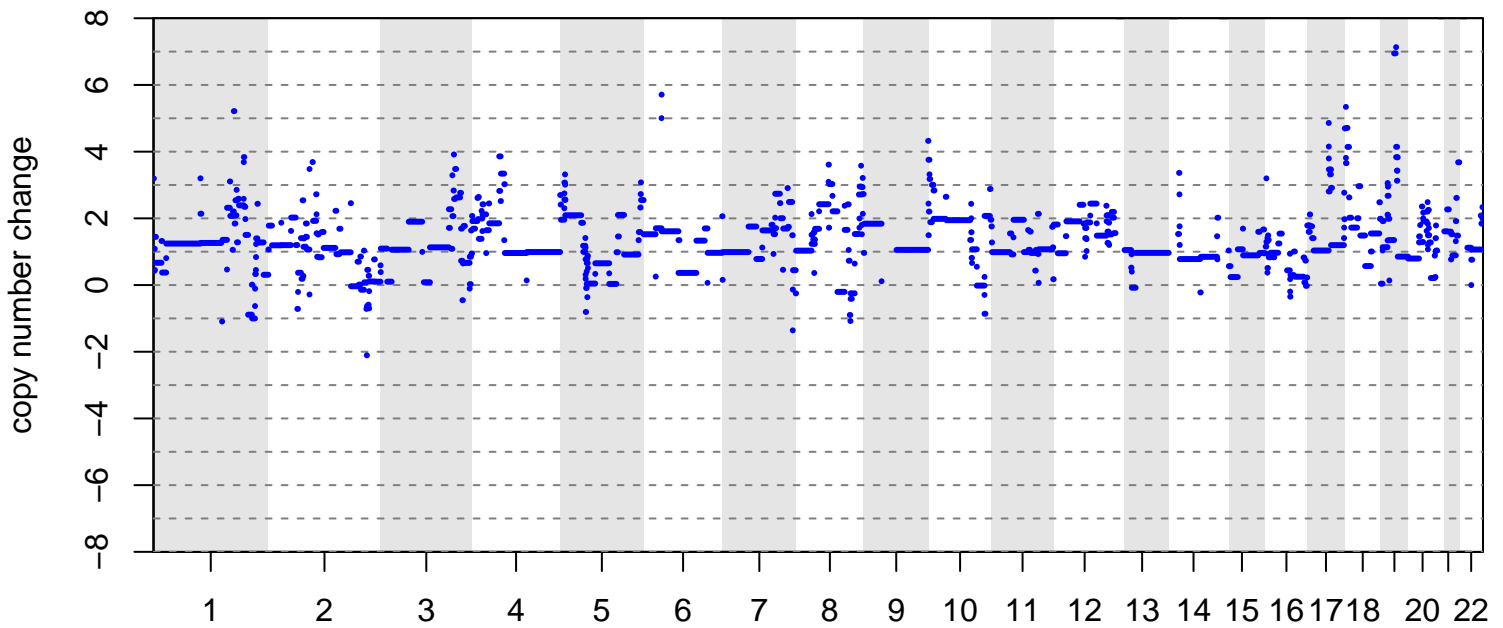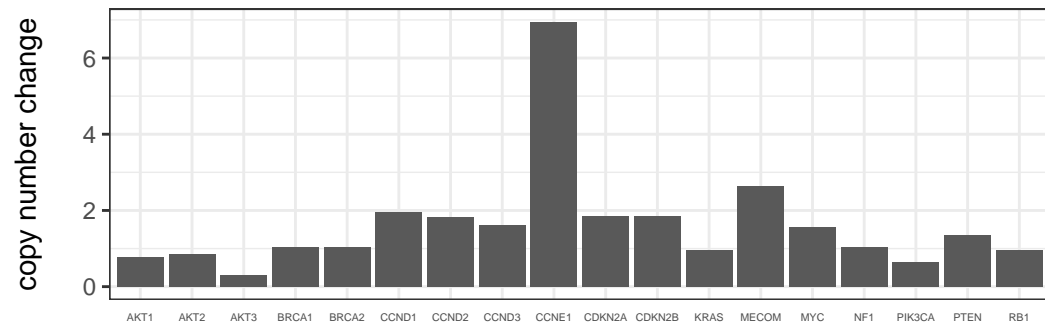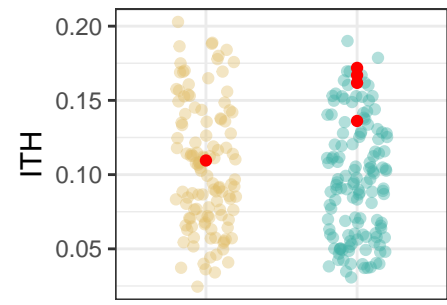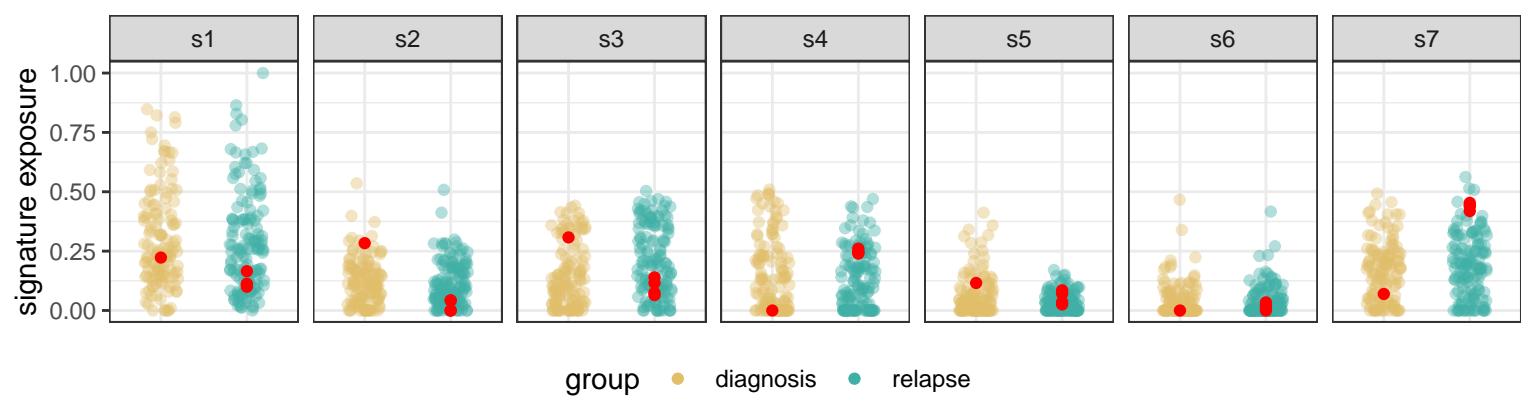

group ● diagnosis ● relapse

BRITROC-8

stage: 2B

platinum status: sensitive

prior lines: 1

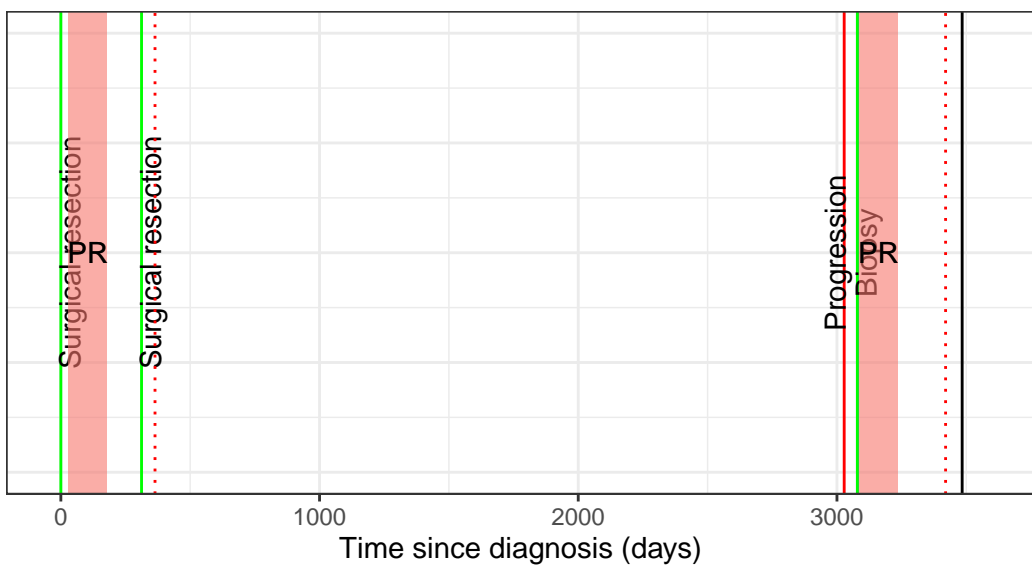

drug ■ Carboplatin

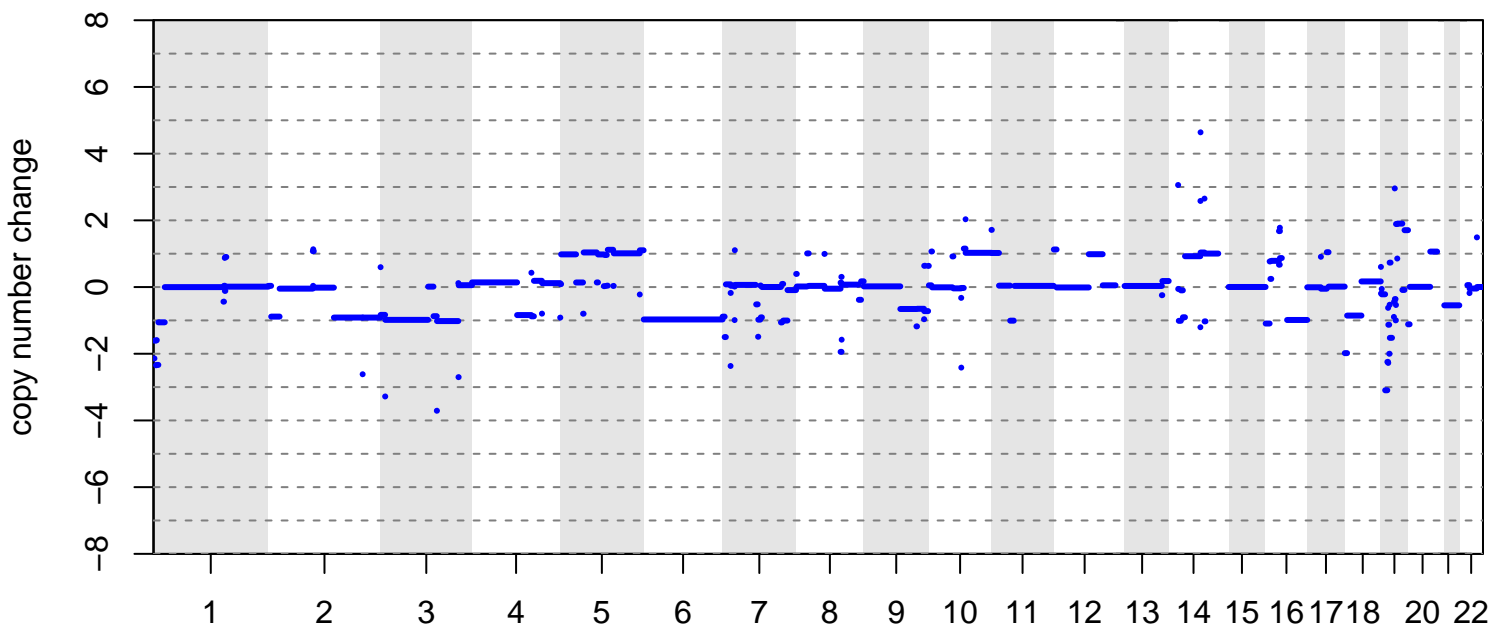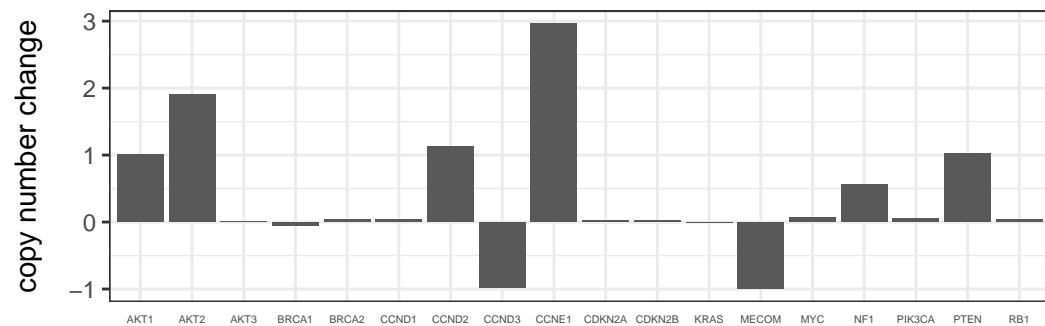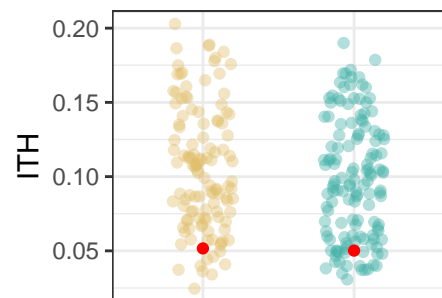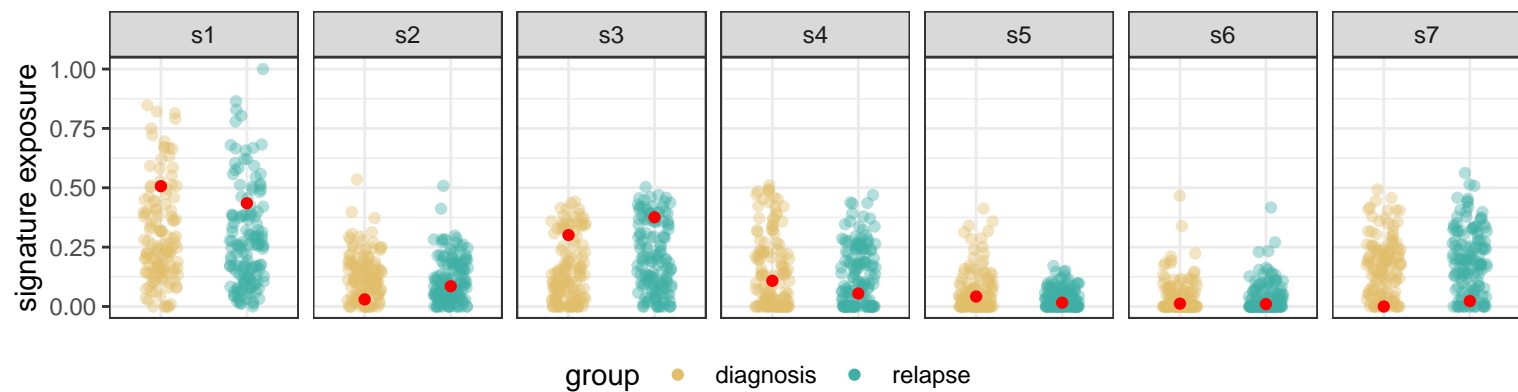

group ● diagnosis ● relapse

BRITROC-9

stage: 3C

platinum status: sensitive

prior lines: 1

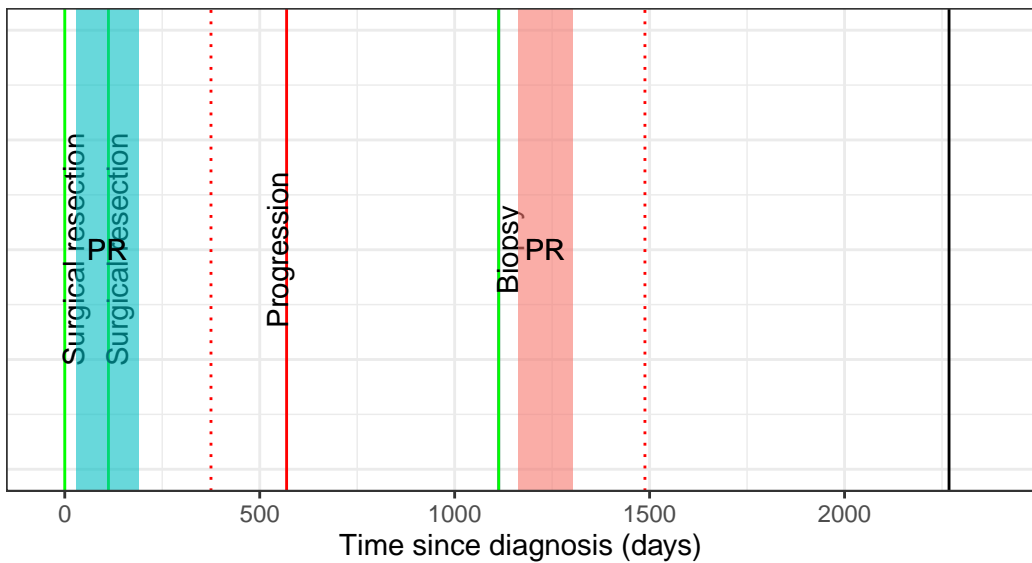

drug ■ Carboplatin + Paclitaxel ■ Carboplatin

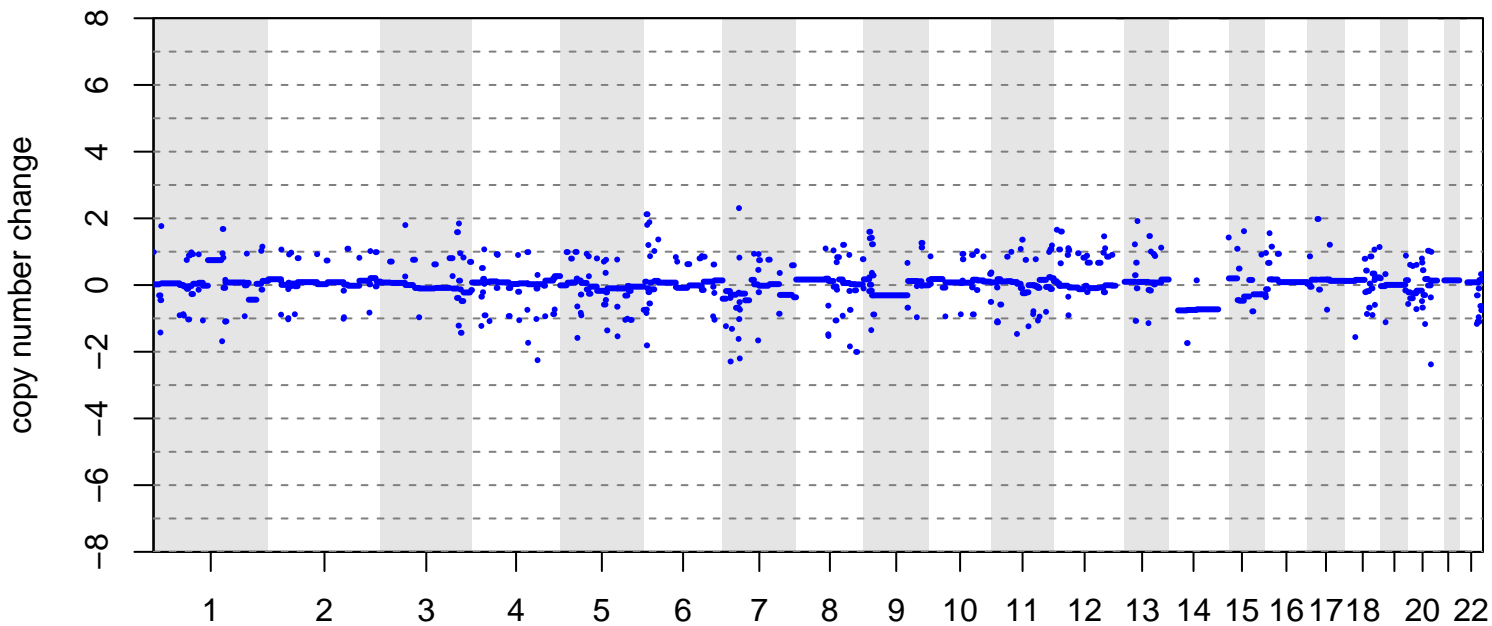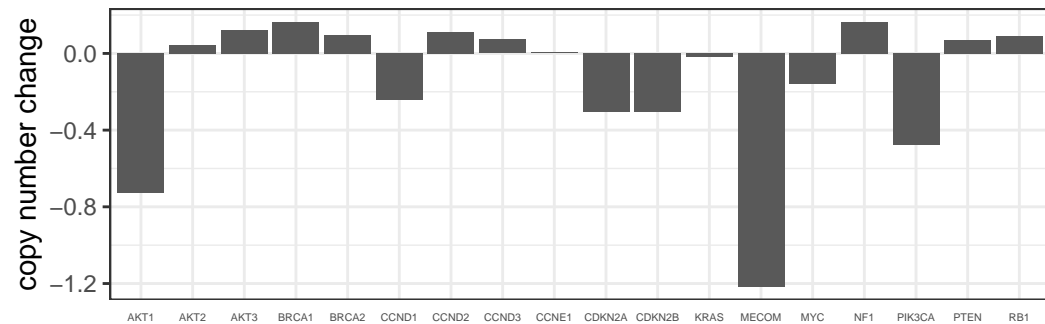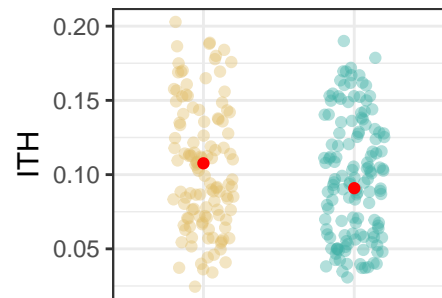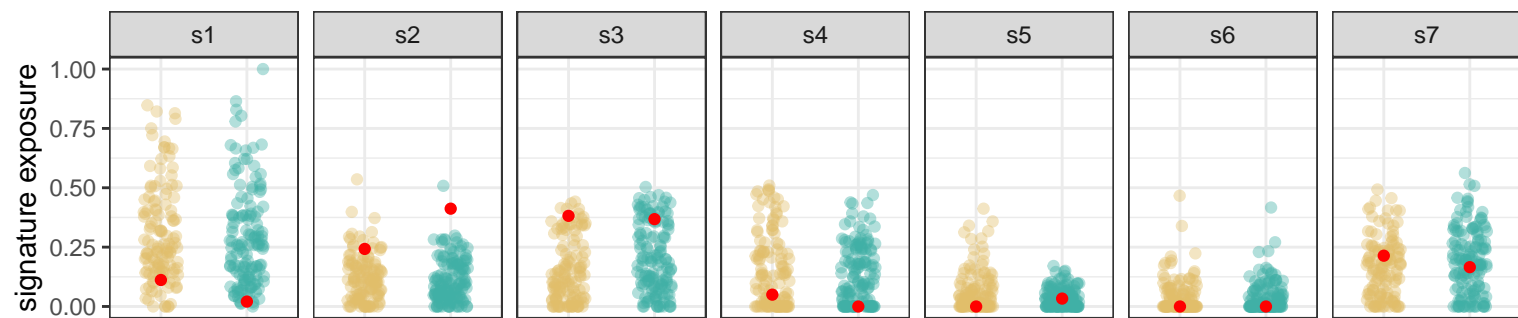

group ● diagnosis ● relapse

BRITROC-94

stage: 2B  
 platinum status: sensitive  
 prior lines: 2

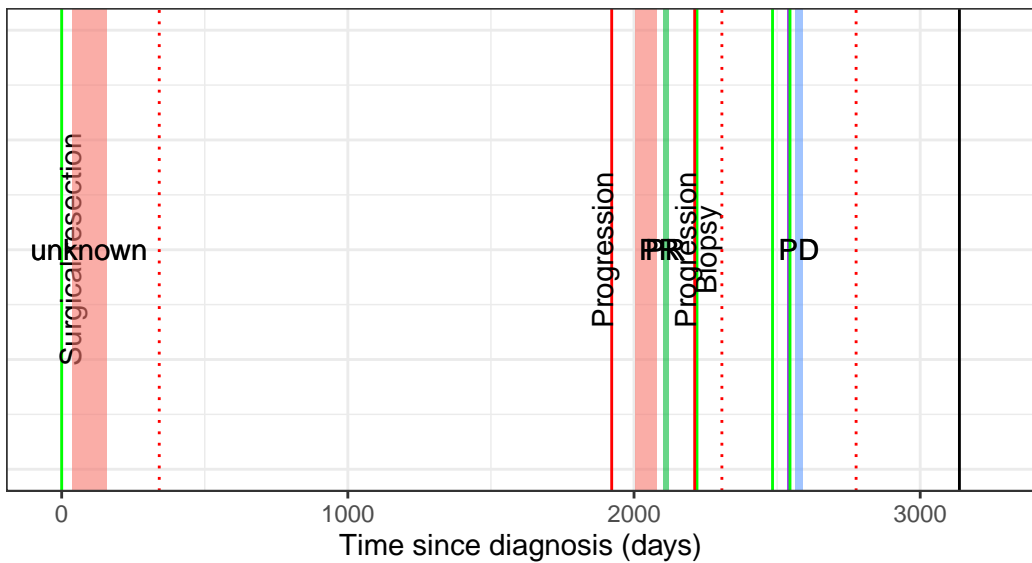

drug Carboplatin + Paclitaxel Cisplatin + Paclitaxel Rucaparib

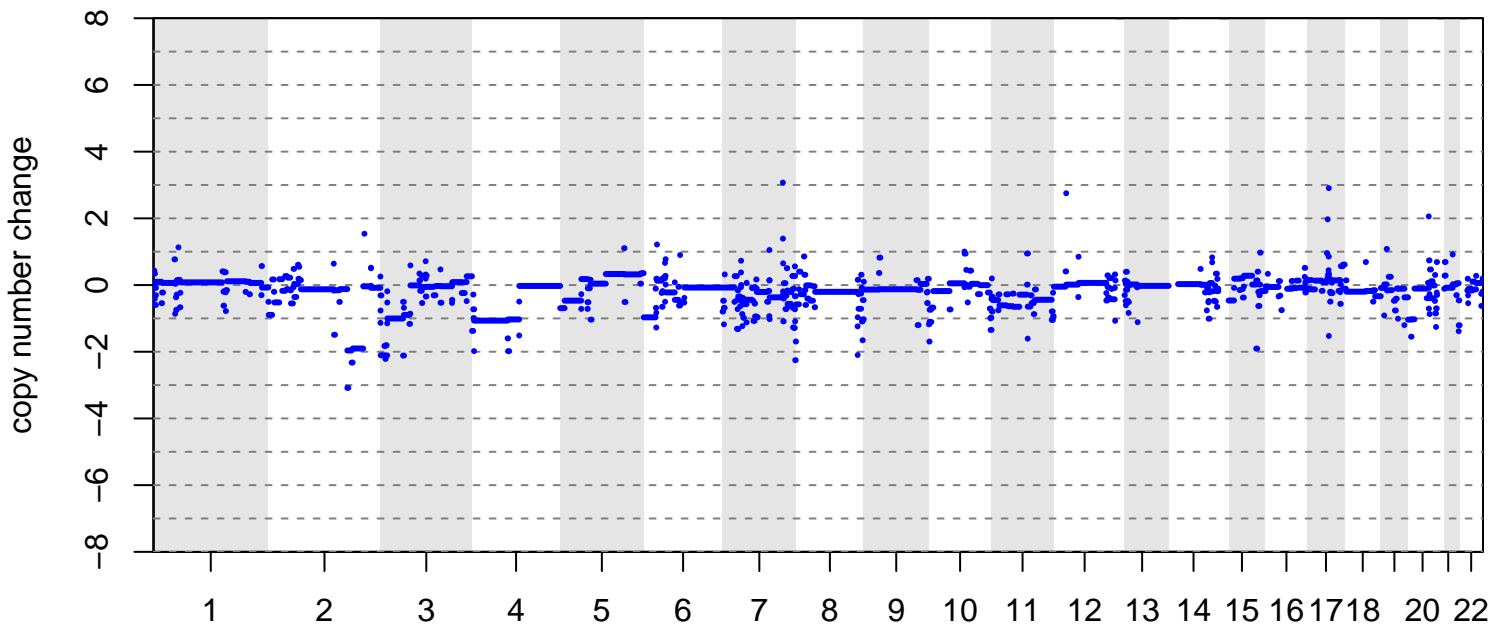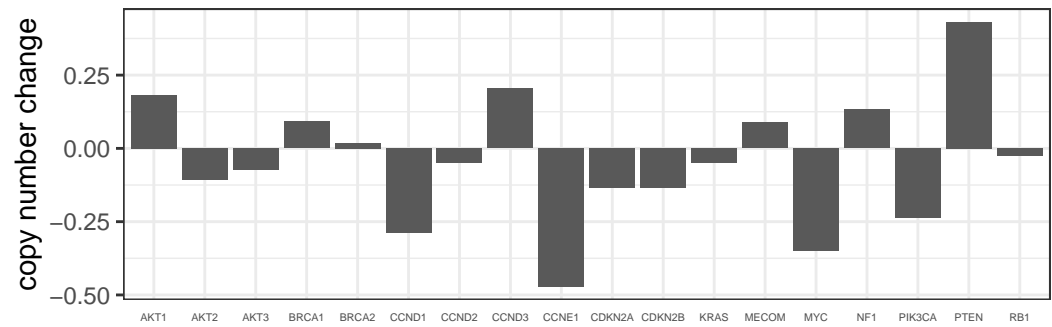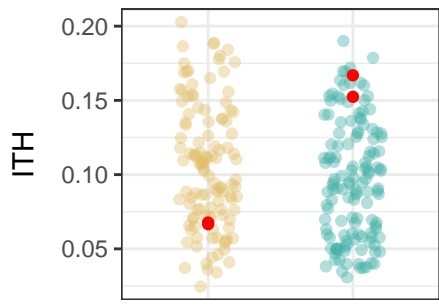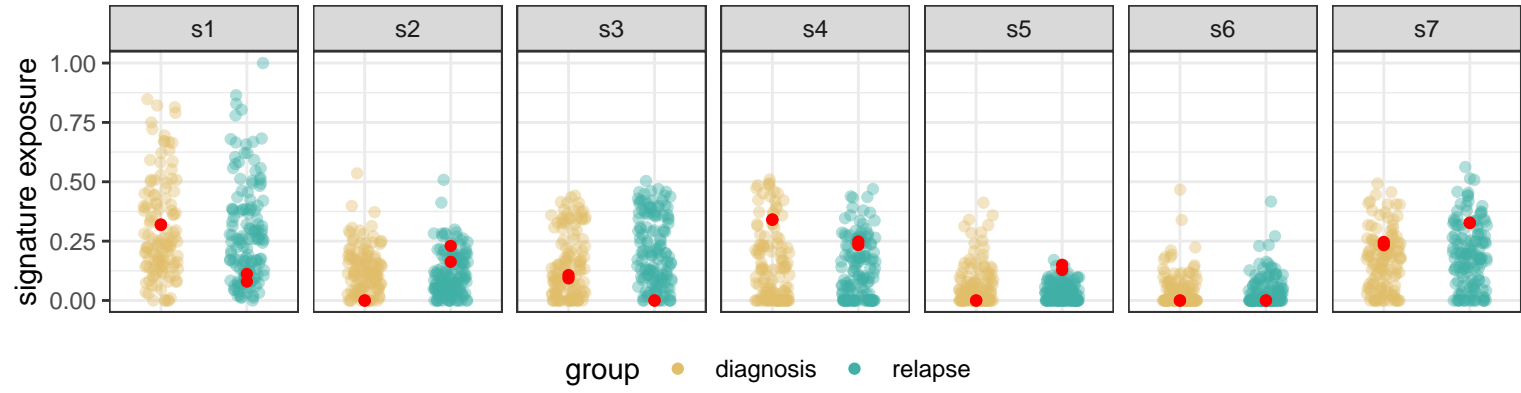

group diagnosis relapse

BRITROC-96

stage: 3B

platinum status: resistant

prior lines: 4

clinical timeline unavailable

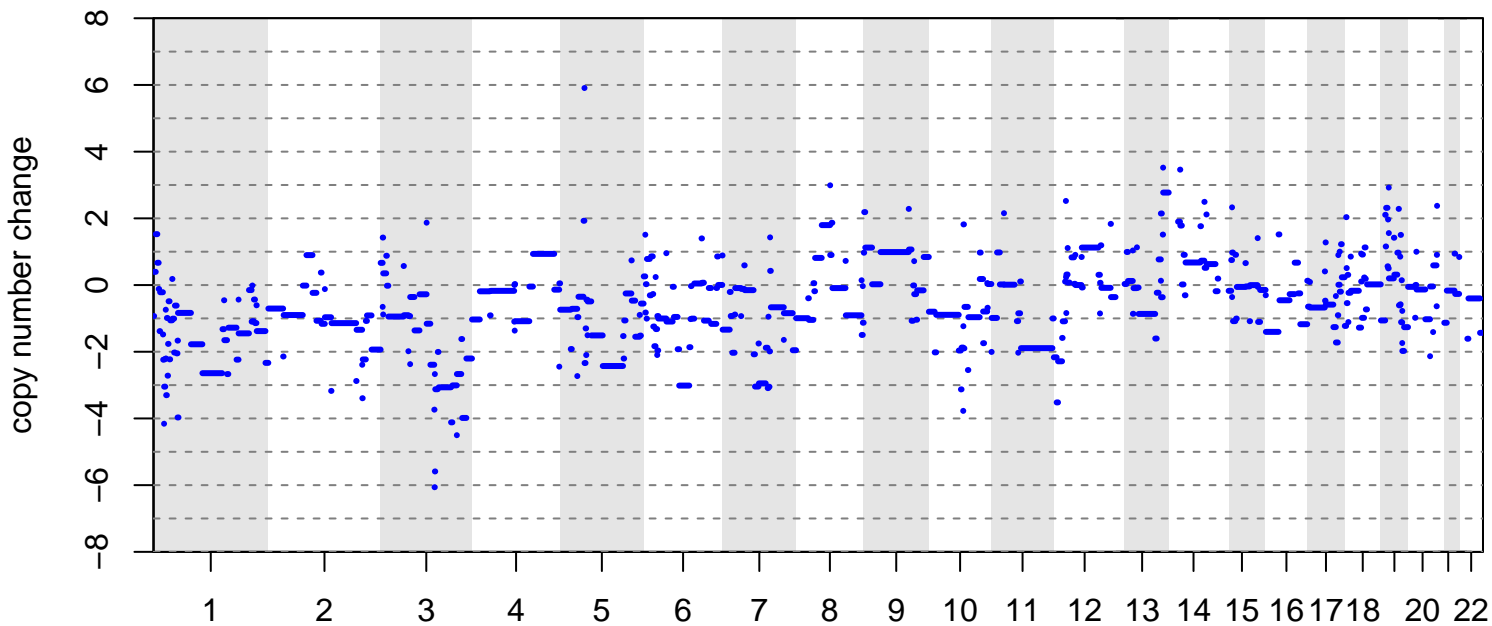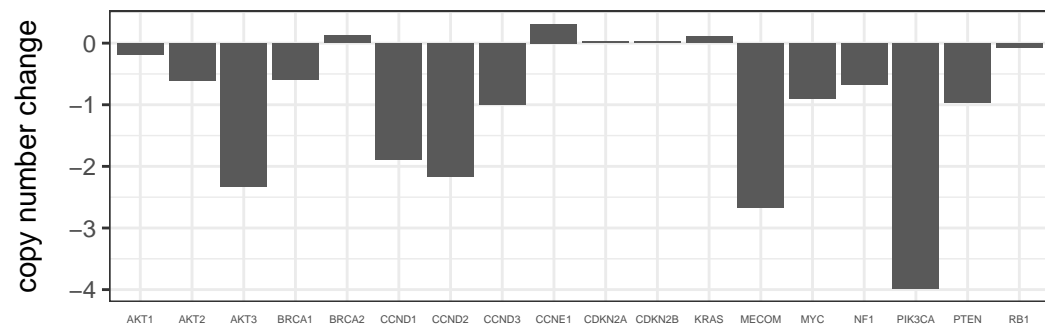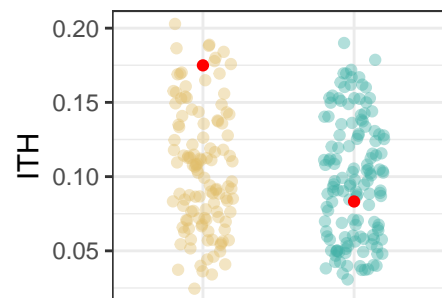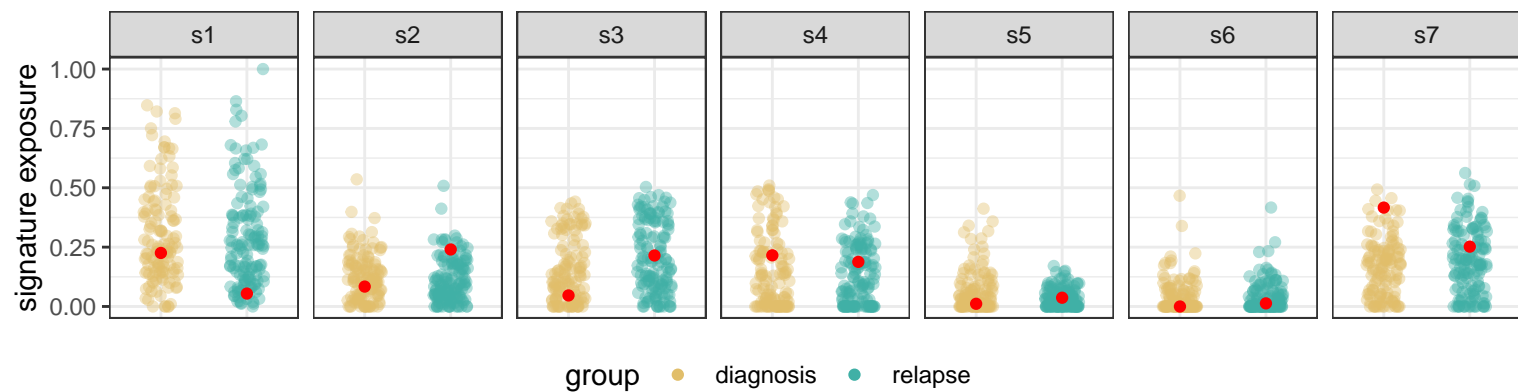

BRITROC-99

stage: 4NA  
 platinum status: sensitive  
 prior lines: 1

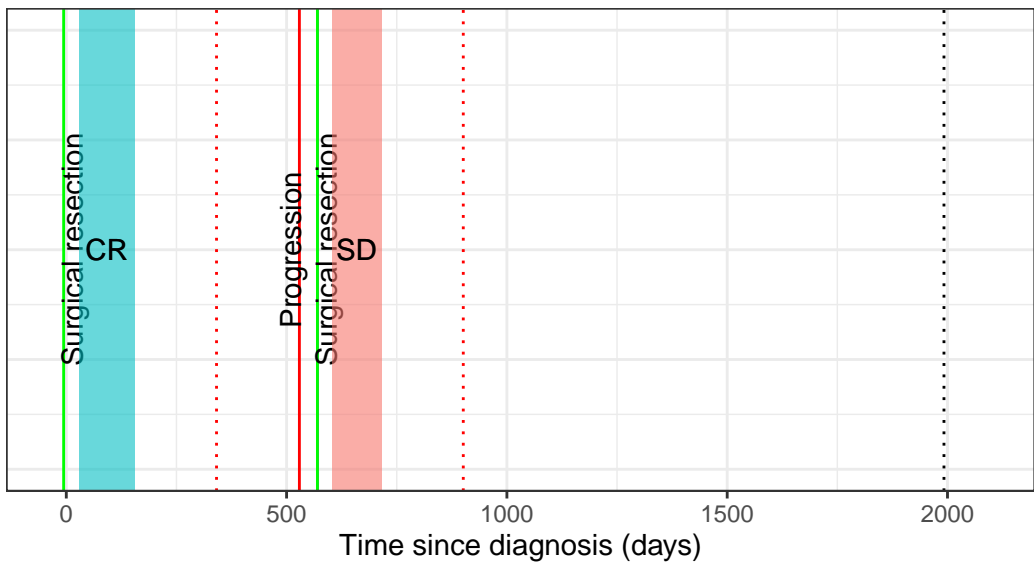

drug ■ Carboplatin + Paclitaxel ■ Carboplatin + Gemcitabine

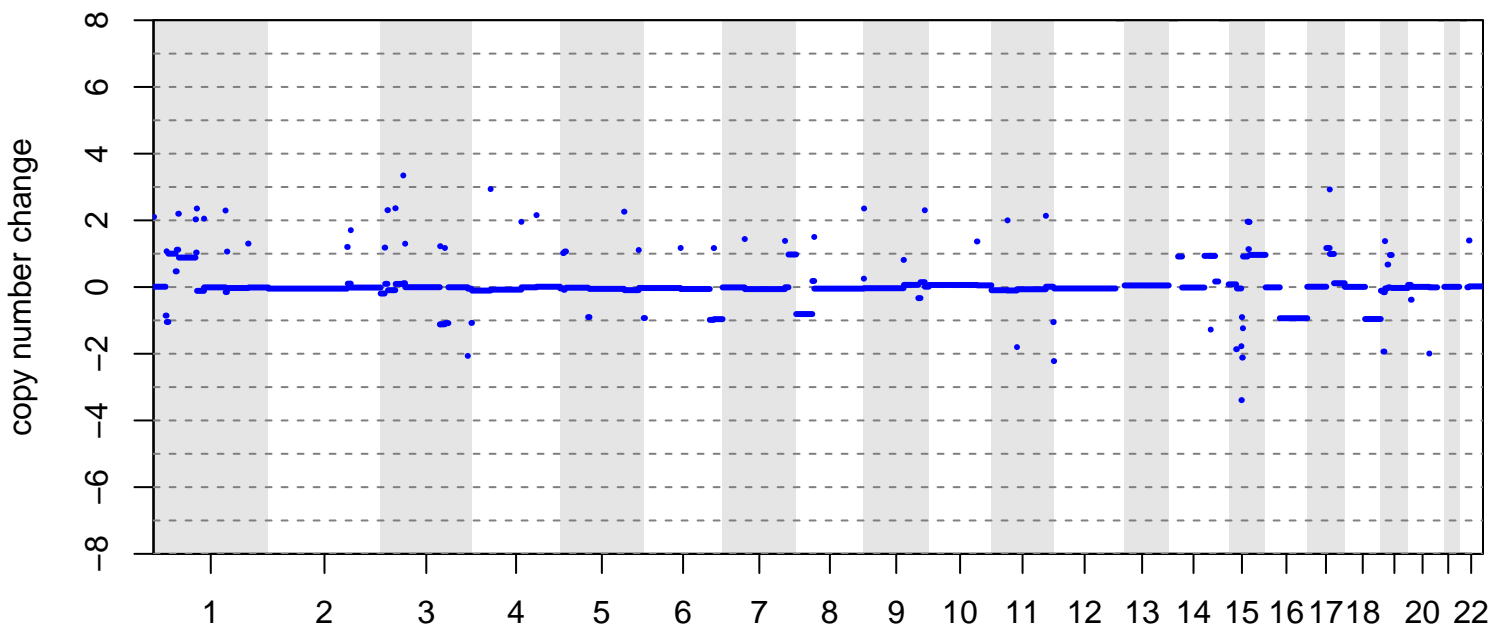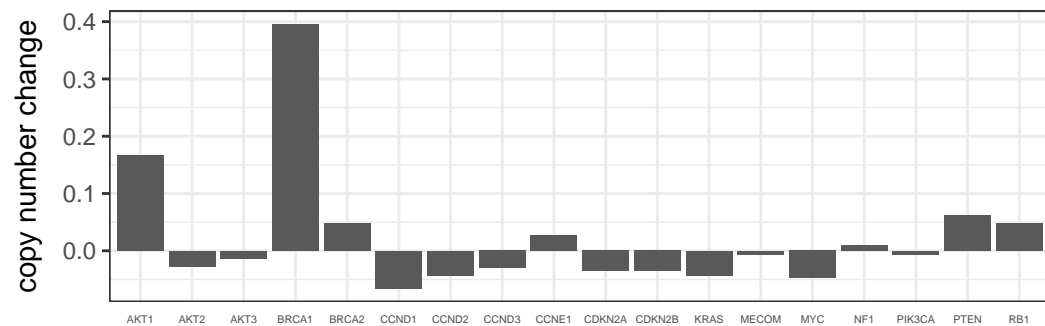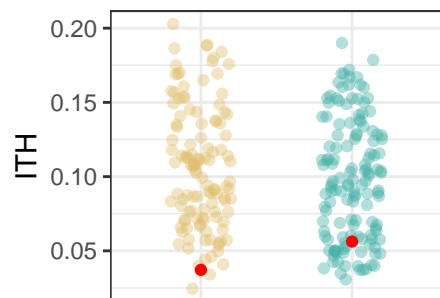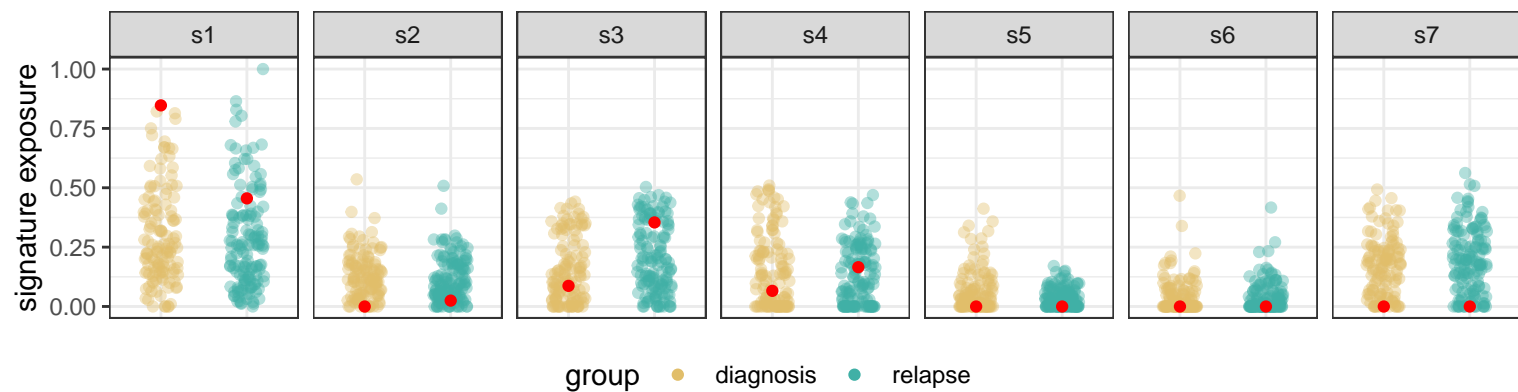

Supplement: Supplementary file [file media-3.pdf]
